# Supplementary material for: Transition-metal-catalyzed regioselective aroyl- and trifluoro-acetylthiolation of alkynes using thioesters
Source: Royal Society of Chemistry journal article supplement (doi:10.1039/b900492k), 2009-01-01

**Supplementary information for**  
**transition-metal-catalyzed regioselective aroyl- and trifluoroacetylthiolation of alkynes**  
**using thioesters**

Yasunori Minami, Hitoshi Kuniyasu,\* Kiyoshi Miyafuji and Nobuaki Kambe\*

*Department of Applied Chemistry, Graduate School of Engineering, Osaka University, Suita, Osaka 565-0871, Japan*

**General Comments:**  $^1\text{H}$  and  $^{13}\text{C}$  NMR spectra in  $\text{CDCl}_3$  and  $\text{DMF-}d_8$  solution were recorded with JEOL JNM-Alice 400 (400 MHz) spectrometer. The chemical shifts in the  $^1\text{H}$  NMR spectra were recorded relative to  $\text{Me}_4\text{Si}$  as an internal standard, and the chemical shifts in the  $^{13}\text{C}$  NMR spectra were recorded relative to  $\text{CHCl}_3$  ( $\delta$  77.0). The IR spectra was measured by a Perkin-Elmer Model 1600 spectrometer. Mass spectra (EI), High-resolution mass spectra (HRMS) and elemental analyses were performed in the Instrumental Analysis Center of the Faculty of Engineering, Osaka University. Melting points were measured by a MPA100 Optimelt Automated Melting Point System. Preparative TLC was carried out using Wakogel B-5F silica gel. All reactions were carried out under a  $\text{N}_2$  atmosphere. All solvents were distilled before use. Thioesters **2a-j**, **7b** were prepared by the reactions of the corresponding acid chlorides with thiols in the presence of pyridine in THF solution, and selenoester **2k** was prepared by the reaction of the benzoyl chloride with  $\text{PhSeMgBr}$  in THF solution. Thioesters **7a**, **c-f** were synthesized according to the literature (*J. Am. Chem. Soc.* **2000**, *122*, 11260.).

**The Spectrum Data or Registry Number (RN) of Thio- and Selenoesters (2 and 7):**

***p*-CH<sub>3</sub>C<sub>6</sub>H<sub>4</sub>C(O)SC<sub>6</sub>H<sub>4</sub>O-*p*-CH<sub>3</sub> (2a): RN: 53271-44-6.**

***p*-CH<sub>3</sub>C<sub>6</sub>H<sub>4</sub>C(O)SC<sub>6</sub>H<sub>5</sub> (2b): RN: 21122-34-2.**

***p*-CH<sub>3</sub>C<sub>6</sub>H<sub>4</sub>C(O)SC<sub>6</sub>H<sub>4</sub>-*p*-F (2c):** white solid; mp 98-100 °C; <sup>1</sup>H NMR (400 MHz, CDCl<sub>3</sub>) δ 2.38 (s, 3 H), 7.10 (dd, *J* = 8.6, 2.9 Hz, 2 H), 7.23 (d, *J* = 8.3 Hz, 2 H), 7.44 (dd, *J* = 8.6, 5.1 Hz, 2 H), 7.89 (d, *J* = 8.3 Hz, 2 H); <sup>13</sup>C NMR (100 MHz, CDCl<sub>3</sub>) δ 21.6, 116.3 (d, *J* = 22 Hz), 122.7 (d, *J* = 3.7 Hz), 128.4 (d, *J* = 189 Hz), 133.7, 137.0 (d, *J* = 8.7 Hz), 144.6, 162.2, 164.7, 189.4; IR (NaCl) 3066, 3044, 2926, 1695, 1667, 1604, 1590, 1574, 1491, 1434, 1409, 1390, 1318, 1293, 1228, 1218, 1206, 1179, 1157, 1124, 1116, 1096, 1013, 903, 850, 826, 811, 789, 718, 646, 624, 544, 499, 497, 430 cm<sup>-1</sup>; mass spectrum (EI) *m/z* 246 (M<sup>+</sup>, 1.1); HRMS calcd for C<sub>14</sub>H<sub>11</sub>FOS: 246.0515. Found: 246.0507.

***p*-CH<sub>3</sub>C<sub>6</sub>H<sub>4</sub>C(O)SC<sub>6</sub>H<sub>4</sub>-*p*-NO<sub>2</sub> (2d): RN: 77750-05-1.**

**C<sub>6</sub>H<sub>5</sub>C(O)SC<sub>6</sub>H<sub>5</sub> (2e): RN: 884-09-3.**

***p*-FC<sub>6</sub>H<sub>4</sub>C(O)SC<sub>6</sub>H<sub>4</sub>-*p*-CH<sub>3</sub> (2f): RN: 90172-74-0.**

**3-C<sub>6</sub>H<sub>4</sub>NC(O)SC<sub>6</sub>H<sub>4</sub>-*p*-CH<sub>3</sub> (2g): RN: 52064-00-3.**

**2-C<sub>5</sub>H<sub>3</sub>OC(O)SC<sub>6</sub>H<sub>4</sub>-*p*-CH<sub>3</sub> (2h): RN: 17357-39-0.**

***p*-CH<sub>3</sub>C<sub>6</sub>H<sub>4</sub>C(O)SCH<sub>2</sub>C<sub>6</sub>H<sub>5</sub> (2i): RN: 17577-21-8.**

***t*-C<sub>4</sub>H<sub>9</sub>C(O)SC<sub>6</sub>H<sub>4</sub>-*p*-OCH<sub>3</sub> (2j): RN: 132381-65-8.**

**C<sub>6</sub>H<sub>5</sub>C(O)SeC<sub>6</sub>H<sub>5</sub> (2k): RN: 38447-68-6.**

**F<sub>3</sub>CC(O)SC<sub>6</sub>H<sub>4</sub>-*p*-CH<sub>3</sub> (7a): RN: 75072-07-0.**

**H<sub>3</sub>CC(O)SC<sub>6</sub>H<sub>4</sub>-*p*-CH<sub>3</sub> (7b): registry number 10436-83-6.**

**Cl<sub>3</sub>CC(O)SC<sub>6</sub>H<sub>4</sub>-*p*-CH<sub>3</sub> (7c): registry number 56956-67-3.**

**F<sub>3</sub>CC(O)SC<sub>6</sub>H<sub>4</sub>-*p*-OCH<sub>3</sub> (7d):** pale yellow oil; <sup>1</sup>H NMR (400 MHz, CDCl<sub>3</sub>) δ 3.85 (s, 3 H), 7.00 (d, *J* = 6.8 Hz, 2 H), 7.36 (d, *J* = 6.8 Hz, 2 H); <sup>13</sup>C NMR (100 MHz, CDCl<sub>3</sub>) δ 55.4, 115.5, 115.9 (c, *J*<sub>C-F</sub> = 290 Hz), 132.3, 136.1, 161.7, 184.2 (c, *J*<sub>C-F</sub> = 39.4 Hz); IR (NaCl) 2945, 2842, 1890, 1794, 1716, 1594, 1575, 1496, 1464, 1442, 1296, 1277, 1257, 1206, 1163, 1031, 937, 828, 742, 604 cm<sup>-1</sup>; mass spectrum (EI) *m/z* 236 (M<sup>+</sup>,

59); HRMS calcd for C<sub>9</sub>H<sub>7</sub>F<sub>3</sub>O<sub>2</sub>S: 236.0119. Found: 236.0097.

**F<sub>3</sub>CC(O)SC<sub>6</sub>H<sub>5</sub> (7e): RN: 2378-04-3.**

**F<sub>3</sub>CC(O)SC<sub>6</sub>H<sub>4</sub>-*p*-Cl (7f): RN: 181820-16-6.**

**F<sub>3</sub>CC(O)SCH<sub>2</sub>C<sub>6</sub>H<sub>5</sub> (7g): RN: 714-05-6.**

**F<sub>3</sub>CC(O)S-*n*-C<sub>10</sub>H<sub>21</sub> (7h):** colorless oil; <sup>1</sup>H NMR (400 MHz, CDCl<sub>3</sub>) δ 0.88 (t, *J* = 6.1 Hz, 3 H), 1.26-1.39 (m, 14 H), 1.65 (tt, *J* = 7.6, 7.3 Hz, 2 H), 3.05 (t, *J* = 7.3 Hz, 2 H); <sup>13</sup>C NMR (100 MHz, CDCl<sub>3</sub>) δ 14.0, 22.7, 28.6, 28.7, 29.0, 29.3, 29.4, 29.5, 31.9, 115.6 (c, *J*<sub>C-F</sub> = 289 Hz), 184.5 (c, *J*<sub>C-F</sub> = 39.4 Hz); IR (NaCl) 2927, 2856, 2362, 1709, 1468, 1283, 1205, 1165, 956, 744 cm<sup>-1</sup>; mass spectrum (EI) *m/z* 270 (M<sup>+</sup>, 0.28); HRMS calcd for C<sub>12</sub>H<sub>21</sub>F<sub>3</sub>OS: 270.1265. Found: 270.1258.

**Reaction of *p*-CH<sub>3</sub>C<sub>6</sub>H<sub>4</sub>C(O)SC<sub>6</sub>H<sub>4</sub>-*p*-OCH<sub>3</sub> (2a) with 1-Octyne (1a) in the Presence of Pd(dba)<sub>2</sub>/dppe (Entry 11 of Table 1, Entry 1 of Table 2): General Procedure of Palladium-Catalyzed Aroylthiolation of**

**Alkynes Using Thioesters:** Into a two-necked 3 mL reaction glass were added Pd(dba)<sub>2</sub> (28.8 mg, 0.05 mmol), dppe (23.9 mg, 0.06 mmol), **1a** (132 mg, 1.2 mmol) **2a** (258 mg, 1.0 mmol) and benzene (0.5 mL) under a N<sub>2</sub> atmosphere. After the solution was refluxed for 20 h, the resultant mixture was filtered through Celite, the solvent was evaporated, and the resultant crude product was dried *in vacuo*. **Z-4a** and **E-4a** were obtained in 30% (112 mg) and 48% (175 mg) yields by preparative TLC using hexane and ethyl acetate (40/1) as an eluent.

**(E)-*p*-CH<sub>3</sub>C<sub>6</sub>H<sub>4</sub>C(O)C(H)=C(*n*-C<sub>6</sub>H<sub>13</sub>)SC<sub>6</sub>H<sub>4</sub>-*p*-OCH<sub>3</sub> (E-4a):** yellow oil; <sup>1</sup>H NMR (400 MHz, CDCl<sub>3</sub>) δ 0.89 (t, *J* = 7.1 Hz, 3 H), 1.30-1.34 (m, 4 H), 1.40-1.46 (m, 2 H), 1.68-1.75 (m, 2 H), 2.34 (s, 3 H), 2.89 (t, *J* = 7.8 Hz, 2 H), 3.87 (s, 3 H), 6.25 (s, 1 H), 6.98 (d, *J* = 8.9 Hz, 2 H), 7.14 (d, *J* = 8.1 Hz, 2 H), 7.47 (d, *J* = 8.9 Hz, 2 H), 7.55 (d, *J* = 8.1 Hz, 2 H); NOE experiment: Irradiation of the vinyl singlet at δ 6.25 resulted in a 17.0% enhancement of the signal at δ 7.55 (aryl doublet); <sup>13</sup>C NMR (100 MHz, CDCl<sub>3</sub>) δ 14.1, 21.4, 22.6, 29.3, 29.9, 31.6, 34.1, 55.4 114.5, 115.3, 120.6, 128.0, 129.0, 137.1, 137.2, 142.5, 160.9, 168.1, 187.1; IR (NaCl) 2955, 2927, 2856, 1645, 1606, 1592, 1568, 1556, 1493, 1462, 1440, 1361, 1290, 1250, 1210, 1181, 1051, 1032, 830, 818, 732 cm<sup>-1</sup>; mass spectrum (EI) *m/e* 368 (M<sup>+</sup>, 15); Anal. Calcd for C<sub>23</sub>H<sub>28</sub>O<sub>2</sub>S: C, 74.96;

H, 7.66. Found: C, 74.74; H, 7.47.

**(Z)-p-CH<sub>3</sub>C<sub>6</sub>H<sub>4</sub>C(O)C(H)=C(n-C<sub>6</sub>H<sub>13</sub>)SC<sub>6</sub>H<sub>4</sub>-p-OCH<sub>3</sub> (Z-4a):** yellow solid; mp 42.0-44.0 °C; <sup>1</sup>H NMR (400 MHz, CDCl<sub>3</sub>) δ 0.82 (t, *J* = 7.1 Hz, 3 H), 1.08-1.10 (m, 4 H), 1.14-1.25 (m, 2 H), 1.38-1.44 (m, 2 H), 2.23 (t, *J* = 7.6 Hz, 2 H), 2.40 (s, 3 H), 3.83 (s, 3 H), 6.90 (d, *J* = 8.3 Hz, 2 H), 7.01 (s, 1 H), 7.25 (d, *J* = 8.3 Hz, 2 H), 7.48 (d, *J* = 8.3 Hz, 2 H), 7.88 (d, *J* = 8.3 Hz, 2 H); NOE experiment: Irradiation of the vinyl singlet at δ 7.01 resulted in a 8.9 % enhancement of the signal at δ 2.23 (allyl triplet) and 17.5 % enhancement of the signal at δ 7.88 (aryl doublet); <sup>13</sup>C NMR (100 MHz, CDCl<sub>3</sub>) δ 13.9, 21.5, 22.4, 28.6, 29.9, 31.3, 37.0, 55.3, 114.5, 115.3, 122.1, 128.1, 129.1, 136.3, 137.2, 142.6, 160.6, 166.4, 188.2; IR (KBr) 2928, 2857, 1632, 1607, 1592, 1570, 1534, 1493, 1463, 1298, 1246, 1180, 1096, 1084, 911, 863, 831, 806, 733 cm<sup>-1</sup>; mass spectrum (EI) *m/e* 368 (M<sup>+</sup>, 25); HRMS calcd for C<sub>23</sub>H<sub>28</sub>O<sub>2</sub>S: 368.1810. Found: 368.1817.

Other aroylthiolation products **4b**, **4c**, **4e-i** and **4k-4q** were synthesized by similar procedures.

**(E)-p-CH<sub>3</sub>C<sub>6</sub>H<sub>4</sub>C(O)C(H)=C(n-C<sub>6</sub>H<sub>13</sub>)SC<sub>6</sub>H<sub>5</sub> (E-4b) (Entry 2 of Table 2):** yellow solid; 71.9-73.1 °C; <sup>1</sup>H NMR (400 MHz, CDCl<sub>3</sub>) δ 0.89 (t, *J* = 7.0 Hz, 3 H), 1.32-1.34 (m, 4 H), 1.40-1.46 (m, 2 H), 1.68-1.74 (m, 2 H), 2.34 (s, 3 H), 2.91 (t, *J* = 7.8 Hz, 2 H), 6.28 (s, 1 H), 7.13 (d, *J* = 8.4 Hz, 2 H), 7.45-7.47 (m, 3 H), 7.53 (d, *J* = 8.4 Hz, 2 H), 7.56-7.58 (m, 2 H); <sup>13</sup>C NMR (100 MHz, CDCl<sub>3</sub>) δ 14.1, 21.5, 22.6, 29.3, 29.8, 31.6, 34.2, 115.2, 128.0, 129.0, 129.7, 129.8, 130.2, 135.6, 137.0, 142.6, 166.9, 187.1; IR (KBr) 2944, 2916, 2855, 1646, 1604, 1578, 1468, 1436, 1352, 1255, 1230, 1211, 1180, 1055, 821, 756, 734, 709, 692 cm<sup>-1</sup>; mass spectrum (EI) *m/e* 338 (M<sup>+</sup>, 16); HRMS calcd for C<sub>22</sub>H<sub>26</sub>OS: 338.1704. Found: 338.1711.

**(Z)-p-CH<sub>3</sub>C<sub>6</sub>H<sub>4</sub>C(O)C(H)=C(n-C<sub>6</sub>H<sub>13</sub>)SC<sub>6</sub>H<sub>5</sub> (Z-4b) (Entry 2 of Table 2):** yellow oil; <sup>1</sup>H NMR (400 MHz, CDCl<sub>3</sub>) δ 0.81 (t, *J* = 7.2 Hz, 3 H), 1.05-1.20 (m, 6 H), 1.38-1.43 (m, 2 H), 2.25 (t, *J* = 7.8 Hz, 2 H), 2.41 (s, 3H), 7.03 (s, 1 H), 7.26 (d, *J* = 8.0 Hz, 2 H), 7.36-7.42 (m, 3 H), 7.57-7.59 (m, 2 H), 7.89 (d, *J* = 8.0 Hz, 2 H); <sup>13</sup>C NMR (100 MHz, CDCl<sub>3</sub>) δ 14.0, 21.6, 22.4, 28.6, 29.9, 31.2, 37.2, 115.8, 128.1, 129.0, 129.2, 129.3, 131.5, 135.8, 136.2, 142.7, 165.1, 188.3; IR (NaCl) 2955, 2927, 2857, 1634, 1607, 1569, 1538, 1475, 1439, 1236, 1208, 1181, 1084, 1018, 863, 806, 788, 752, 704, 693 cm<sup>-1</sup>; mass spectrum (EI) *m/e* 338 (M<sup>+</sup>,

17); HRMS calcd for C<sub>22</sub>H<sub>26</sub>OS: 338.1704. Found: 338.1700.

**(E)-p-CH<sub>3</sub>C<sub>6</sub>H<sub>4</sub>C(O)C(H)=C(n-C<sub>6</sub>H<sub>13</sub>)SC<sub>6</sub>H<sub>4</sub>-p-F (E-4c) (Entry 3 of Table 2):** yellow oil; <sup>1</sup>H NMR (400 MHz, CDCl<sub>3</sub>) δ 0.89 (t, *J* = 7.1 Hz, 3 H), 1.30-1.34 (m, 4 H), 1.42-1.45 (m, 2 H), 1.67-1.73 (m, 2 H), 2.35 (s, 3 H), 2.89 (t, *J* = 7.8 Hz, 2 H), 6.22 (s, 1 H), 7.15-7.20 (m, 4 H), 7.52-7.58 (m, 4 H); <sup>13</sup>C NMR (100 MHz, CDCl<sub>3</sub>) δ 14.1, 21.5, 22.6, 29.3, 29.8, 31.6, 34.1, 115.1, 117.1 (d, *J*<sub>C-F</sub> = 22.0 Hz), 125.5 (d, *J*<sub>C-F</sub> = 2.4 Hz), 128.0, 129.1, 136.9, 137.8 (d, *J*<sub>C-F</sub> = 8.3 Hz), 142.8, 163.7 (d, *J*<sub>C-F</sub> = 250 Hz), 166.8, 187.2; IR (NaCl) 2956, 2928, 2856, 1652, 1607, 1590, 1568, 1558, 1490, 1466, 1362, 1233, 1181, 1156, 1051, 1015, 835, 817, 731 cm<sup>-1</sup>; mass spectrum (EI) *m/e* 356 (M<sup>+</sup>, 8.1); HRMS calcd for C<sub>22</sub>H<sub>25</sub>FOS: 356.1610. Found: 356.1606.

**(Z)-p-CH<sub>3</sub>C<sub>6</sub>H<sub>4</sub>C(O)C(H)=C(n-C<sub>6</sub>H<sub>13</sub>)SC<sub>6</sub>H<sub>4</sub>-p-F (Z-4c) (Entry 3 of Table 2):** yellow solid; mp 57-60 °C; <sup>1</sup>H NMR (400 MHz, CDCl<sub>3</sub>) δ 0.83 (t, *J* = 7.2 Hz, 3 H), 1.09-1.10 (m, 4 H), 1.17-1.22 (m, 2 H), 1.38-1.44 (m, 2 H), 2.22 (t, *J* = 7.8 Hz, 2 H), 2.42 (s, 3 H), 7.04 (s, 1 H), 7.07-7.11 (m, 2 H), 7.27 (d, *J* = 7.6 Hz, 2 H), 7.54-7.58 (m, 2 H), 7.89 (d, *J* = 7.6 Hz, 2 H); <sup>13</sup>C NMR (100 MHz, CDCl<sub>3</sub>) δ 14.0, 21.6, 22.4, 28.6, 29.8, 31.3, 37.1, 115.9, 116.2 (d, *J*<sub>C-F</sub> = 22.0 Hz), 126.9 (d, *J*<sub>C-F</sub> = 3.7 Hz), 128.1, 129.2, 136.0, 137.7 (d, *J*<sub>C-F</sub> = 8.3 Hz), 142.8, 163.5 (d, *J*<sub>C-F</sub> = 249 Hz), 164.7, 188.4; IR (KBr) 2952, 2925, 2856, 1628, 1606, 1534, 1484, 1236, 1224, 1183, 1082, 842, 808 cm<sup>-1</sup>; mass spectrum (EI) *m/e* 356 (M<sup>+</sup>, 9.3); HRMS calcd for C<sub>22</sub>H<sub>25</sub>FOS: 356.1610. Found: 356.1617.

**(E)-C<sub>6</sub>H<sub>5</sub>C(O)C(H)=C(n-C<sub>6</sub>H<sub>13</sub>)SC<sub>6</sub>H<sub>5</sub> (E-4e) (Entry 5 of Table 2):** yellow oil; <sup>1</sup>H NMR (400 MHz, CDCl<sub>3</sub>) δ 0.90 (t, *J* = 7.0 Hz, 3 H), 1.31-1.35 (m, 4 H), 1.41-1.47 (m, 2 H), 1.69-1.77 (m, 2 H), 2.92 (t, *J* = 7.8 Hz, 2 H), 6.29 (s, 1 H), 7.31-7.35 (m, 2 H), 7.41-7.43 (m, 1 H), 7.45-7.49 (m, 3 H), 7.56-7.59 (m, 2 H), 7.61-7.63 (m, 2 H); <sup>13</sup>C NMR (100 MHz, CDCl<sub>3</sub>) δ 14.1, 22.6, 29.3, 29.9, 31.6, 34.3, 114.9, 127.9, 128.3, 129.8, 129.9, 130.1, 132.0, 135.7, 139.6, 167.8, 187.3; IR (NaCl) 3060, 2955, 2927, 2856, 1651, 1597, 1557, 1466, 1440, 1362, 1229, 1179, 1047, 1024, 778, 751, 692, 643 cm<sup>-1</sup>; mass spectrum (EI) *m/e* 324 (M<sup>+</sup>, 25); Anal. Calcd for C<sub>21</sub>H<sub>24</sub>OS: C, 77.73; H, 7.46. Found: C, 77.59; H, 7.29.

**(Z)-C<sub>6</sub>H<sub>5</sub>C(O)C(H)=C(*n*-C<sub>6</sub>H<sub>13</sub>)SC<sub>6</sub>H<sub>5</sub> (Z-4e) (Entry 5 of Table 2):** yellow oil; <sup>1</sup>H NMR (400 MHz, CDCl<sub>3</sub>) δ 0.81 (t, *J* = 7.2 Hz, 3 H), 1.06-1.20 (m, 6 H), 1.41-1.46 (m, 2 H), 2.26 (t, *J* = 7.8 Hz, 2 H), 7.05 (s, 1 H), 7.39-7.60 (m, 8 H), 7.99 (d, *J* = 8.1 Hz, 2 H); <sup>13</sup>C NMR (100 MHz, CDCl<sub>3</sub>) δ 13.9, 22.3, 28.6, 29.9, 31.2, 37.3, 115.7, 128.0, 128.5, 129.0, 129.3, 131.3, 132.0, 135.7, 138.7, 165.9, 188.6; IR (NaCl) 3058, 2955, 2929, 2857, 1634, 1598, 1578, 1548, 1538, 1532, 1476, 1446, 1440, 1355, 1303, 1233, 1178, 1105, 1070, 1025, 1001, 859, 828, 774, 752, 704, 676 cm<sup>-1</sup>; mass spectrum (EI) *m/e* 324 (M<sup>+</sup>, 17); HRMS calcd for C<sub>21</sub>H<sub>24</sub>OS: 324.1548. Found: 324.1540.

**(E)-*p*-FC<sub>6</sub>H<sub>4</sub>C(O)C(H)=C(*n*-C<sub>6</sub>H<sub>13</sub>)SC<sub>6</sub>H<sub>4</sub>-*p*-CH<sub>3</sub> (E-4f) (Entry 6 of Table 2):** yellow oil; <sup>1</sup>H NMR (400 MHz, CDCl<sub>3</sub>) δ 0.90 (t, *J* = 7.4 Hz, 3 H), 1.32-1.46 (m, 6 H), 1.68-1.75 (m, 2 H), 2.42 (s, 3 H), 2.89 (t, *J* = 7.8 Hz, 2 H), 6.23 (s, 1 H), 6.98-7.02 (m, 2 H), 7.28 (d, *J* = 7.8 Hz, 2 H), 7.44 (d, *J* = 7.8 Hz, 2 H), 7.63-7.66 (m, 2 H); <sup>13</sup>C NMR (100 MHz, CDCl<sub>3</sub>) δ 14.1, 21.4, 22.6, 29.3, 29.9, 31.6, 34.2, 114.2, 115.3 (d, *J*<sub>C-F</sub> = 21.5 Hz), 126.3, 130.3 (d, *J*<sub>C-F</sub> = 9.2 Hz), 130.6, 135.5, 135.9 (d, *J*<sub>C-F</sub> = 3.2 Hz), 140.3, 165.0 (d, *J*<sub>C-F</sub> = 252 Hz), 168.7, 185.8; IR (NaCl): 2956, 2927, 2857, 1651, 1598, 1557, 1505, 1493, 1456, 1433, 1408, 1363, 1229, 1155, 1050, 1018, 829, 812 cm<sup>-1</sup>; mass spectrum (EI) *m/e* 356 (M<sup>+</sup>, 10); Anal. Calcd for C<sub>22</sub>H<sub>25</sub>FOS: C, 74.12; H, 7.07. Found: C, 74.13; H, 7.12.

**(Z)-*p*-FC<sub>6</sub>H<sub>4</sub>C(O)C(H)=C(*n*-C<sub>6</sub>H<sub>13</sub>)SC<sub>6</sub>H<sub>4</sub>-*p*-CH<sub>3</sub> (Z-4f) (Entry 6 of Table 2):** yellow oil; <sup>1</sup>H NMR (400 MHz, CDCl<sub>3</sub>) δ 0.81 (t, *J* = 7.2 Hz, 3 H), 1.05-1.21 (m, 6 H), 1.38-1.46 (m, 2 H), 2.25 (t, *J* = 7.8 Hz, 2 H), 2.39 (s, 3 H), 6.99 (s, 1 H), 7.11-7.16 (m, 2 H), 7.20 (d, *J* = 8.2 Hz, 2 H), 7.45 (d, *J* = 8.2 Hz, 2 H), 7.99-8.03 (m, 2 H); <sup>13</sup>C NMR (100 MHz, CDCl<sub>3</sub>) δ 14.0, 21.3, 22.4, 28.6, 30.0, 31.2, 37.2, 115.0, 115.5 (d, *J*<sub>C-F</sub> = 21.5 Hz), 127.6, 129.8, 130.4 (d, *J*<sub>C-F</sub> = 8.7 Hz), 135.1 (d, *J*<sub>C-F</sub> = 2.7 Hz), 135.6, 139.7, 165.1 (d, *J*<sub>C-F</sub> = 252 Hz), 167.2, 187.0; IR (NaCl) 2956, 2928, 2858, 1634, 1600, 1538, 1532, 1505, 1494, 1463, 1230, 1155, 1084, 1018, 867, 852, 812, 733 cm<sup>-1</sup>; mass spectrum (EI) *m/e* 356 (M<sup>+</sup>, 12); Anal. Calcd for C<sub>22</sub>H<sub>25</sub>FOS: C, 74.12; H, 7.07. Found: C, 74.02; H, 7.23.

**(E)-3-C<sub>5</sub>H<sub>4</sub>NC(O)C(H)=C(*n*-C<sub>6</sub>H<sub>13</sub>)SC<sub>6</sub>H<sub>4</sub>-*p*-CH<sub>3</sub> (E-4g) (Entry 7 of Table 2):** yellow oil; <sup>1</sup>H NMR (400 MHz, CDCl<sub>3</sub>) δ 0.90 (t, *J* = 6.6 Hz, 3 H), 1.34-1.47 (m, 6 H), 1.73 (dt, 2 H), 2.42 (s, 3 H), 2.94 (t, *J* = 7.8 Hz, 2 H), 6.23 (s, 1 H), 7.28-7.33 (m, 3 H), 7.44 (d, *J* = 7.8 Hz, 2 H), 8.01 (d, *J* = 7.8 Hz, 1 H), 8.64 (d, *J* = 3.9 Hz, 1 H), 8.74 (s, 1 H); <sup>13</sup>C NMR (100 MHz, CDCl<sub>3</sub>) δ 14.0, 21.4, 22.6, 29.3, 29.9, 31.5, 34.6, 113.2, 123.4, 125.9, 129.8, 130.7, 135.4, 135.5, 140.6, 149.1, 152.2, 171.2, 185.1; IR (NaCl) 3033, 2955, 2927, 2856, 1651, 1584, 1556, 1493, 1456, 1416, 1366, 1237, 1106, 1060, 1040, 1018, 849, 811, 732, 702, 662 cm<sup>-1</sup>; mass spectrum (EI) *m/e* 339 (M<sup>+</sup>, 20); Anal. Calcd for C<sub>21</sub>H<sub>25</sub>NOS: C, 74.29; H, 7.42; N, 4.13. Found: C, 74.07; H, 7.41; N, 4.16.

**(Z)-3-C<sub>5</sub>H<sub>4</sub>NC(O)C(H)=C(*n*-C<sub>6</sub>H<sub>13</sub>)SC<sub>6</sub>H<sub>4</sub>-*p*-CH<sub>3</sub> (Z-4g) (Entry 7 of Table 2):** yellow oil; <sup>1</sup>H NMR (400 MHz, CDCl<sub>3</sub>) δ 0.81 (t, *J* = 8.9 Hz, 3 H), 1.05-1.21 (m, 6 H), 1.43 (dt, 2 H), 2.26 (t, *J* = 7.8 Hz, 2 H), 2.39 (s, 3 H), 7.01 (s, 1 H), 7.21 (d, *J* = 7.8 Hz, 2 H), 7.40-7.47 (m, 3 H), 8.28 (d, *J* = 8.1 Hz, 1 H), 8.74 (d, *J* = 3.2 Hz, 1 H), 9.18 (s, 1 H); <sup>13</sup>C NMR (100 MHz, CDCl<sub>3</sub>) δ 13.9, 21.2, 22.3, 28.5, 29.9, 31.1, 37.2, 114.6, 123.5, 127.1, 129.8, 134.0, 135.4, 135.5, 139.8, 149.2, 152.3, 169.2, 186.6; IR (NaCl) 3020, 2955, 2927, 2857, 1634, 1585, 1569, 1530, 1493, 1456, 1416, 1249, 1088, 1019, 862, 812, 756, 704, 666, 620 cm<sup>-1</sup>; mass spectrum (EI) *m/e* 339 (M<sup>+</sup>, 20), 123 (100); Anal. Calcd for C<sub>21</sub>H<sub>25</sub>NOS: C, 74.29; H, 7.42; N, 4.13. Found: C, 74.01; H, 7.14; N, 4.13.

**(E)-2-C<sub>4</sub>H<sub>3</sub>OC(O)C(H)=C(*n*-C<sub>6</sub>H<sub>13</sub>)SC<sub>6</sub>H<sub>4</sub>-*p*-CH<sub>3</sub> (E-4h) (Entry 8 of Table 2):** yellow oil; <sup>1</sup>H NMR (400 MHz, CDCl<sub>3</sub>) δ 0.89 (t, *J* = 7.0 Hz, 2 H), 1.30-1.34 (m, 4 H), 1.42-1.46 (m, 2 H), 1.66-1.72 (m, 2 H), 2.43 (s, 3 H), 2.93 (t, *J* = 7.7, 2 H), 6.18 (s, 1 H), 6.40-6.41 (m, 1 H), 6.77 (d, *J* = 3.7 Hz, 1 H), 7.28 (d, *J* = 7.7 Hz, 2 H), 7.42-7.44 (m, 3 H); <sup>13</sup>C NMR (100 MHz, CDCl<sub>3</sub>) δ 14.0, 21.3, 22.5, 29.2, 29.8, 31.5, 34.2, 111.9, 113.4, 115.6, 126.4, 130.5, 135.5, 140.3, 145.6, 154.3, 169.0, 175.6; IR (NaCl) 2955, 2927, 2856, 1643, 1572, 1492, 1467, 1432, 1394, 1353, 1262, 1165, 1156, 1088, 1056, 1017, 913, 884, 811, 756, 732, 694 cm<sup>-1</sup>; mass spectrum (EI) *m/e* 328 (M<sup>+</sup>, 30); Anal. Calcd for C<sub>20</sub>H<sub>24</sub>O<sub>2</sub>S: C, 73.13; H, 7.36. Found: C, 72.89; H, 7.08.

**(Z)-2-C<sub>4</sub>H<sub>3</sub>OC(O)C(H)=C(*n*-C<sub>6</sub>H<sub>13</sub>)SC<sub>6</sub>H<sub>4</sub>-*p*-CH<sub>3</sub> (Z-4h) (Entry 8 of Table 2):** yellow oil; <sup>1</sup>H NMR (400

MHz, CDCl<sub>3</sub>)  $\delta$  0.81 (t,  $J$  = 7.2 Hz, 3 H), 1.06-1.08 (m, 4 H), 1.15-1.19 (m, 2 H), 1.39-1.43 (m, 2 H), 2.22 (t,  $J$  = 7.8, 2 H), 2.38 (s, 3 H), 6.52-6.56 (m, 1 H), 6.92 (s, 1 H), 7.18-7.20 (m, 3 H), 7.44 (d,  $J$  = 8.1 Hz, 2 H), 7.55-7.56 (m, 1 H); NOE experiment: Irradiation of the vinyl singlet at  $\delta$  6.92 resulted in a 6.9 % enhancement of the signal at  $\delta$  2.22; <sup>13</sup>C NMR (100 MHz, CDCl<sub>3</sub>)  $\delta$  14.0, 21.3, 22.3, 28.5, 29.8, 31.2, 37.1, 112.3, 114.9, 115.6, 127.5, 129.8, 135.7, 139.6, 145.2, 154.1, 166.6, 177.3; IR (NaCl) 2955, 2928, 2858, 1633, 1574, 1538, 1493, 1470, 1258, 1157, 1101, 1010, 884, 813, 756 cm<sup>-1</sup>; mass spectrum (EI) m/e 328 (M<sup>+</sup>, 29); Anal. Calcd for C<sub>20</sub>H<sub>24</sub>O<sub>2</sub>S: C, 73.13; H, 7.36. Found: C, 72.90; H, 6.97.

The structure of **4i** was tentatively assigned by <sup>1</sup>H NMR spectrum.

**(E)-p-CH<sub>3</sub>C<sub>6</sub>H<sub>4</sub>C(O)C(H)=C(n-C<sub>6</sub>H<sub>13</sub>)SCH<sub>2</sub>C<sub>6</sub>H<sub>5</sub> (E-4i) (Entry 9 of Table 2):** <sup>1</sup>H NMR (400 MHz, CDCl<sub>3</sub>)  $\delta$  6.24 (s, 1 H, vinyl proton).

**(Z)-p-CH<sub>3</sub>C<sub>6</sub>H<sub>4</sub>C(O)C(H)=C(n-C<sub>6</sub>H<sub>13</sub>)SCH<sub>2</sub>C<sub>6</sub>H<sub>5</sub> (Z-4i) (Entry 9 of Table 2):** <sup>1</sup>H NMR (400 MHz, CDCl<sub>3</sub>)  $\delta$  7.01 (s, 1 H, vinyl proton).

**(E)-p-CH<sub>3</sub>C<sub>6</sub>H<sub>4</sub>C(O)C(H)=C((CH<sub>2</sub>)<sub>4</sub>Cl)SC<sub>6</sub>H<sub>4</sub>-p-OCH<sub>3</sub> (E-4k) (Entry 11 of Table 2):** yellow oil; <sup>1</sup>H NMR (400 MHz, CDCl<sub>3</sub>)  $\delta$  1.85-1.95 (m, 4 H), 2.35 (s, 3 H), 2.92 (t,  $J$  = 7.3 Hz, 2 H), 3.59 (t,  $J$  = 6.5 Hz, 2 H), 3.85 (s, 3 H), 6.29 (s, 1 H), 6.99 (d,  $J$  = 8.6 Hz, 2 H), 7.15 (d,  $J$  = 8.2 Hz, 2 H), 7.48 (d,  $J$  = 8.6 Hz, 2 H), 7.54 (d,  $J$  = 8.2 Hz, 2 H); <sup>13</sup>C NMR (100 MHz, CDCl<sub>3</sub>)  $\delta$  21.5, 27.1, 32.3, 33.0, 44.8, 55.4, 114.9, 115.3, 120.3, 128.0, 129.0, 136.9, 137.2, 142.7, 161.0, 166.9, 187.1; IR (NaCl) 2956, 2866, 2838, 1645, 1606, 1592, 1574, 1568, 1557, 1494, 1462, 1441, 1360, 1291, 1250, 1181, 1050, 1031, 830, 819, 734 cm<sup>-1</sup>; mass spectrum (EI) m/e 374 (M<sup>+</sup>, 24); Anal. Calcd for C<sub>21</sub>H<sub>23</sub>ClO<sub>2</sub>S: C, 67.27; H, 6.18. Found: C, 67.08; H, 5.96.

**(Z)-p-CH<sub>3</sub>C<sub>6</sub>H<sub>4</sub>C(O)C(H)=C((CH<sub>2</sub>)<sub>4</sub>Cl)SC<sub>6</sub>H<sub>4</sub>-p-OCH<sub>3</sub> (Z-4k) (Entry 11 of Table 2):** yellow oil; <sup>1</sup>H NMR (400 MHz, CDCl<sub>3</sub>)  $\delta$  1.58-1.61 (m, 4 H), 2.27 (t,  $J$  = 6.8 Hz, 2 H), 2.41 (s, 3 H), 3.38 (t,  $J$  = 5.7 Hz, 2 H), 3.84 (s, 3 H), 6.92 (d,  $J$  = 8.6 Hz, 2 H), 7.02 (s, 1 H), 7.26 (d,  $J$  = 8.1 Hz, 2 H), 7.49 (d,  $J$  = 8.6 Hz, 2 H), 7.89 (d,  $J$  = 8.1 Hz, 2 H); <sup>13</sup>C NMR (100 MHz, CDCl<sub>3</sub>)  $\delta$  21.6, 27.0, 31.7, 36.2, 44.4, 55.4, 114.7, 115.7,



121.9, 128.1, 129.2, 136.1, 137.2, 142.8, 160.7, 165.1, 188.2; IR (NaCl) 3002, 2956, 2866, 1632, 1607, 1591, 1570, 1538, 1493, 1461, 1441, 1288, 1246, 1208, 1180, 1174, 1104, 1074, 1030, 831, 806, 754, 734  $\text{cm}^{-1}$ ; mass spectrum (EI)  $m/e$  374 ( $M^+$ , 23); Anal. Calcd for  $\text{C}_{21}\text{H}_{23}\text{ClO}_2\text{S}$ : C, 67.27; H, 6.18. Found: C, 67.26; H, 6.06.

**(E)-*p*-CH<sub>3</sub>C<sub>6</sub>H<sub>4</sub>C(O)C(H)=C((CH<sub>2</sub>)<sub>3</sub>CN)SC<sub>6</sub>H<sub>4</sub>-*p*-OCH<sub>3</sub> (E-4l) (Entry 12 of Table 2):** yellow solid; mp 87.4-88.6 °C; <sup>1</sup>H NMR (400 MHz, CDCl<sub>3</sub>)  $\delta$  2.08-2.15 (m, 2 H), 2.35 (s, 3 H), 2.52 (t,  $J = 7.4$  Hz, 2 H), 2.98 (t,  $J = 7.6$  Hz, 2 H), 3.85 (s, 3 H), 6.34 (s), 7.01 (d,  $J = 8.8$  Hz, 2 H), 7.16 (d,  $J = 8.0$  Hz, 2 H), 7.48 (d,  $J = 8.8$  Hz, 2 H), 7.53 (d,  $J = 8.0$  Hz, 2 H); <sup>13</sup>C NMR (100 MHz, CDCl<sub>3</sub>)  $\delta$  16.8, 21.5, 25.5, 32.7, 55.4, 115.5, 115.7, 119.5, 119.7, 128.0, 129.1, 136.6, 137.1, 143.0, 161.2, 164.8, 187.1; IR (KBr) 1646, 1606, 1590, 1568, 1495, 1457, 1434, 1358, 1300, 1287, 1249, 1184, 1058, 1018, 835, 816, 797, 737, 705  $\text{cm}^{-1}$ ; mass spectrum (EI)  $m/e$  351 ( $M^+$ , 29); Anal. Calcd for  $\text{C}_{21}\text{H}_{21}\text{NO}_2\text{S}$ : C, 71.76; H, 6.02; N, 3.99. Found: C, 71.72; H, 6.09; N, 4.00.

**(E)-*p*-CH<sub>3</sub>C<sub>6</sub>H<sub>4</sub>C(O)C(H)=C((CH<sub>2</sub>)<sub>3</sub>CO<sub>2</sub>CH<sub>3</sub>)SC<sub>6</sub>H<sub>4</sub>-*p*-OCH<sub>3</sub> (E-4m) (Entry 13 of Table 2):** yellow oil; <sup>1</sup>H NMR (400 MHz, CDCl<sub>3</sub>)  $\delta$  2.07 (dt, 2 H), 2.33 (s, 3 H), 2.48 (t,  $J = 7.7$  Hz, 3 H), 2.94 (t,  $J = 7.7$  Hz, 2 H), 3.67 (s, 3 H), 3.84 (s, 3 H), 6.29 (s, 1 H), 6.99 (d,  $J = 8.8$  Hz, 2 H), 7.13 (d,  $J = 8.2$  Hz, 2 H), 7.47 (d,  $J = 8.8$  Hz, 2 H), 7.53 (d,  $J = 8.2$  Hz, 2 H); <sup>13</sup>C NMR (100 MHz, CDCl<sub>3</sub>)  $\delta$  21.4, 24.8, 32.9, 33.4, 51.4, 55.3, 115.1, 115.3, 120.2, 127.9, 129.0, 136.8, 137.1, 142.6, 161.0, 166.3, 173.6, 186.9; IR (NaCl) 2950, 1737, 1646, 1606, 1592, 1568, 1494, 1455, 1437, 1364, 1291, 1250, 1181, 1049, 1030, 831, 819, 733  $\text{cm}^{-1}$ ; mass spectrum (EI)  $m/e$  384 ( $M^+$ , 17); Anal. Calcd for  $\text{C}_{22}\text{H}_{24}\text{O}_4\text{S}$ : C, 68.72; H, 6.29. Found: C, 68.68; H, 6.14.

**(Z)-*p*-CH<sub>3</sub>C<sub>6</sub>H<sub>4</sub>C(O)C(H)=C((CH<sub>2</sub>)<sub>3</sub>CO<sub>2</sub>CH<sub>3</sub>)SC<sub>6</sub>H<sub>4</sub>-*p*-OCH<sub>3</sub> (Z-4m) (Entry 13 of Table 2):** orange solid; mp 85.0-87.9 °C; <sup>1</sup>H NMR (400 MHz, CDCl<sub>3</sub>)  $\delta$  1.75 (dt, 2 H), 2.16 (t,  $J = 7.3$  Hz, 2 H), 2.30 (t,  $J = 7.3$  Hz, 2 H), 2.41 (s, 3 H), 3.61 (s, 3 H), 3.84 (s, 3 H), 6.92 (d,  $J = 7.6$  Hz, 2 H), 7.02 (s, 1 H), 7.26 (d,  $J = 8.2$  Hz, 2 H), 7.48 (d,  $J = 7.6$  Hz, 2 H), 7.89 (d,  $J = 8.2$  Hz, 2 H); <sup>13</sup>C NMR (100 MHz, CDCl<sub>3</sub>)  $\delta$  21.6, 24.8,

32.9, 36.0, 51.5, 55.4, 114.7, 116.0, 121.9, 128.1, 129.2, 136.1, 137.1, 142.8, 160.7, 164.4, 173.3, 188.2; IR (KBr) 1732, 1627, 1606, 1588, 1568, 1531, 1494, 1484, 1448, 1285, 1240, 1180, 1153, 1072, 1017, 845, 834, 809  $\text{cm}^{-1}$ ; mass spectrum (EI)  $m/e$  384 ( $M^+$ , 21); HRMS calcd for  $\text{C}_{22}\text{H}_{24}\text{O}_4\text{S}$ : 384.1395. Found: 384.1393.

**(E)-*p*-CH<sub>3</sub>C<sub>6</sub>H<sub>4</sub>C(O)C(H)=C(CH<sub>2</sub>(*c*-C<sub>5</sub>H<sub>9</sub>))SC<sub>6</sub>H<sub>4</sub>-*p*-OCH<sub>3</sub> (E-4n) (Entry 14 of Table 2):** yellow oil; <sup>1</sup>H NMR (400 MHz, CDCl<sub>3</sub>)  $\delta$  1.29-1.34 (m, 2 H), 1.52-1.56 (m, 2 H), 1.62-1.68 (m, 2 H), 1.83-1.87 (m, 2 H), 2.29-2.35 (m, 1 H), 2.33 (s, 3 H), 3.00 (d,  $J = 7.3$  Hz, 2 H), 3.85 (s, 3 H), 6.24 (s, 1 H), 6.98 (d,  $J = 8.8$  Hz, 2 H), 7.13 (d,  $J = 8.1$  Hz, 2 H), 7.47 (d,  $J = 8.8$  Hz, 2 H), 7.53 (d,  $J = 8.1$  Hz, 2 H); <sup>13</sup>C NMR (100 MHz, CDCl<sub>3</sub>)  $\delta$  21.4, 24.8, 32.4, 39.0, 40.5, 55.4, 115.1, 115.3, 120.8, 128.0, 129.0, 137.1, 137.2, 142.5, 160.9, 167.3, 187.3; IR (NaCl) 2951, 2866, 1647, 1606, 1592, 1560, 1493, 1462, 1440, 1407, 1360, 1290, 1250, 1210, 1181, 1104, 1050, 1032, 830, 819, 733  $\text{cm}^{-1}$ ; mass spectrum (EI)  $m/e$  366 ( $M^+$ , 25); Anal. Calcd for  $\text{C}_{23}\text{H}_{26}\text{O}_2\text{S}$ : C, 75.37; H, 7.15. Found: C, 75.23; H, 7.28.

**(Z)-*p*-CH<sub>3</sub>C<sub>6</sub>H<sub>4</sub>C(O)C(H)=C(CH<sub>2</sub>(*c*-C<sub>5</sub>H<sub>9</sub>))SC<sub>6</sub>H<sub>4</sub>-*p*-OCH<sub>3</sub> (Z-4n) (Entry 14 of Table 2):** yellow oil; <sup>1</sup>H NMR (400 MHz, CDCl<sub>3</sub>)  $\delta$  0.97-1.03 (m, 2 H), 1.43-1.64 (m, 6 H), 1.93-1.97 (m, 1 H), 2.24 (d,  $J = 6.8$  Hz, 2 H), 2.41 (s, 3 H), 3.84 (s, 3 H), 6.90 (d,  $J = 8.5$  Hz, 2 H), 7.01 (s, 1 H), 7.26 (d,  $J = 8.1$  Hz, 2 H), 7.47 (d,  $J = 8.5$  Hz, 2 H), 7.88 (d,  $J = 8.1$  Hz, 2 H); <sup>13</sup>C NMR (100 MHz, CDCl<sub>3</sub>)  $\delta$  21.6, 24.8, 32.2, 39.6, 42.9, 55.3, 114.5, 115.9, 122.3, 128.1, 129.1, 136.4, 137.2, 142.6, 160.5, 165.3, 188.2; IR (NaCl) 2951, 2866, 1632, 1607, 1592, 1571, 1537, 1494, 1462, 1453, 1441, 1288, 1246, 1207, 1180, 1101, 1082, 1031, 1018, 862, 830, 809, 799, 788, 755, 734  $\text{cm}^{-1}$ ; mass spectrum (EI)  $m/e$  366 ( $M^+$ , 23); HRMS calcd for  $\text{C}_{23}\text{H}_{26}\text{O}_2\text{S}$ : 366.1654. Found: 366.1658.

**(E)-*p*-CH<sub>3</sub>C<sub>6</sub>H<sub>4</sub>C(O)C(H)=C((CH<sub>2</sub>)<sub>2</sub>CH(CH<sub>3</sub>)<sub>2</sub>)SC<sub>6</sub>H<sub>4</sub>-*p*-OCH<sub>3</sub> (E-4o) (Entry 15 of Table 2):** yellow oil; <sup>1</sup>H NMR (400 MHz, CDCl<sub>3</sub>)  $\delta$  0.96 (d,  $J = 6.3$  Hz, 6 H), 1.58-1.73 (m, 3 H), 2.35 (s, 3 H), 2.90 (t,  $J = 6.8$  Hz, 2 H), 3.86 (s, 3 H), 6.25 (s, 1 H), 6.99 (d,  $J = 8.8$  Hz, 2 H), 7.14 (d,  $J = 7.9$  Hz, 2 H), 7.48 (d,  $J = 8.8$  Hz,

2 H), 7.55 (d,  $J = 7.9$  Hz, 2 H);  $^{13}\text{C}$  NMR (100 MHz,  $\text{CDCl}_3$ )  $\delta$  21.5, 22.4, 28.4, 32.2, 38.8, 55.4, 114.5, 115.3, 120.6, 128.0, 129.0, 137.1, 137.2, 142.5, 161.0, 168.4, 187.1; IR (NaCl) 3005, 2956, 2868, 1646, 1607, 1592, 1560, 1493, 1464, 1442, 1366, 1290, 1250, 1208, 1181, 1052, 1031, 1018, 830, 818, 759, 734  $\text{cm}^{-1}$ ; mass spectrum (EI)  $m/e$  354 ( $\text{M}^+$ , 24); HRMS calcd for  $\text{C}_{22}\text{H}_{26}\text{O}_2\text{S}$ : 354.1654. Found: 354.1651.

**(Z)- $p\text{-CH}_3\text{C}_6\text{H}_4\text{C}(\text{O})\text{C}(\text{H})=\text{C}((\text{CH}_2)_2\text{CH}(\text{CH}_3)_2)\text{SC}_6\text{H}_4\text{-}p\text{-OCH}_3$  (Z-4o) (Entry 15 of Table 2):** yellow solid; mp 94.0-95.0  $^\circ\text{C}$ ;  $^1\text{H}$  NMR (400 MHz,  $\text{CDCl}_3$ )  $\delta$  0.68 (d,  $J = 6.4$  Hz, 6 H), 1.31-1.34 (m, 3 H), 2.25 (t,  $J = 7.7$  Hz, 2 H), 2.41 (s, 3 H), 3.83 (s, 3 H), 6.91 (d,  $J = 8.8$  Hz, 2 H), 7.02 (s, 1 H), 7.25 (d,  $J = 7.9$  Hz, 2 H), 7.49 (d,  $J = 8.8$  Hz, 2 H), 7.89 (d,  $J = 7.9$  Hz, 2 H);  $^{13}\text{C}$  NMR (100 MHz,  $\text{CDCl}_3$ )  $\delta$  21.6, 22.1, 27.8, 35.2, 39.3, 55.4, 114.5, 115.3, 122.1, 128.1, 129.1, 136.3, 137.3, 142.6, 160.6, 166.8, 188.3; IR (KBr) 2957, 2868, 1632, 1606, 1590, 1570, 1534, 1492, 1464, 1442, 1296, 1239, 1181, 1171, 1098, 1086, 1027, 1016, 867, 830, 799, 789  $\text{cm}^{-1}$ ; mass spectrum (EI)  $m/e$  354 ( $\text{M}^+$ , 26); Anal. Calcd for  $\text{C}_{22}\text{H}_{26}\text{O}_2\text{S}$ : C, 74.54; H, 7.39. Found: C, 74.38; H, 7.19.

**$p\text{-CH}_3\text{C}_6\text{H}_4\text{C}(\text{O})\text{C}(\text{H})=\text{C}(\text{C}_6\text{H}_5)\text{SC}_6\text{H}_4\text{-}p\text{-OCH}_3$  (4p, a mixture of stereoisomer) (Entry 16 of Table 2):** yellow solid;  $^1\text{H}$  NMR (400 MHz,  $\text{CDCl}_3$ ) *Z* isomer;  $\delta$  2.41 (s, 3 H), 3.68 (s, 3 H), 6.57 (d,  $J = 8.8$  Hz, 2 H), 7.09-7.16 (m, 9 H), 7.25 (s, 1 H), 7.93 (d,  $J = 8.0$  Hz, 2 H); *E* isomer; 2.33 (s, 3 H), 3.86 (s, 3 H), 6.28 (s, 1 H), 6.99 (d,  $J = 8.5$  Hz, 2 H), other peaks overlap with those of *Z* isomer;  $^{13}\text{C}$  NMR (100 MHz,  $\text{CDCl}_3$ ) *Z* isomer;  $\delta$  21.6, 55.2, 113.9, 119.1, 123.4, 127.7, 128.2, 128.3, 128.9, 129.3, 136.0, 136.1, 138.9, 143.1, 159.5, 163.1, 188.3.; *E* isomer;  $\delta$  21.5, 55.4, 115.4, 117.4, 121.1, 128.1, 128.4, 128.5, 128.8, 129.0, 135.9, 137.1, 137.2, 142.9, 161.0, 161.1, 188.4; IR (KBr): 2929, 1626, 1605, 1591, 1570, 1560, 1526, 1492, 1460, 1443, 1406, 1333, 1302, 1291, 1245, 1174, 1106, 1030, 1017, 955, 830, 815, 770, 737, 703, 676  $\text{cm}^{-1}$ ; mass spectrum (EI)  $m/e$  360 ( $\text{M}^+$ , 38); (EI)  $m/e$  360 ( $\text{M}^+$ , 38); Anal. Calcd for  $\text{C}_{23}\text{H}_{20}\text{O}_2\text{S}$ : C, 76.64; H, 5.59. Found: C, 76.48; H, 5.48.

The structure of **Z-4q** was tentatively determined by  $^1\text{H}$  NMR spectrum (*vide infra*).

**(Z)-C<sub>6</sub>H<sub>5</sub>C(O)C(H)=C(*n*-C<sub>6</sub>H<sub>13</sub>)SeC<sub>6</sub>H<sub>5</sub> (Z-4q) (Entry 17 of Table 2):** <sup>1</sup>H NMR (400 MHz, CDCl<sub>3</sub>) δ 6.93 (s, 1 H, vinyl proton).

**Reaction of *p*-CH<sub>3</sub>C<sub>6</sub>H<sub>4</sub>C(O)SC<sub>6</sub>H<sub>4</sub>-*p*-OCH<sub>3</sub> (2a) with 1-Octyne (1a) in the Presence of Pt(PPh<sub>3</sub>)<sub>4</sub> (Entry 18 of Table 1):** Into a two-necked 3 mL reaction glass were added Pt(PPh<sub>3</sub>)<sub>4</sub> (62.5 mg, 0.05 mmol), **2a** (254 mg, 0.983 mmol), **1a** (135 mg, 1.23 mmol) and toluene (0.5 mL) under a N<sub>2</sub> atmosphere. After the solution was refluxed for 13 h, the resultant mixture was filtered through Celite, the solvent was evaporated, and the resultant crude product was dried *in vacuo*. **Z-3a** and **E-4a** were obtained in 75% (255 mg) and 8% (30 mg) yield by preparative TLC using hexane and ethyl acetate (40/1) as an eluent.

**(Z)-*p*-CH<sub>3</sub>C<sub>6</sub>H<sub>4</sub>C(H)=C(*n*-C<sub>6</sub>H<sub>13</sub>)SC<sub>6</sub>H<sub>4</sub>-*p*-OCH<sub>3</sub> (Z-3a):** pale yellow oil; <sup>1</sup>H NMR (400 MHz, CDCl<sub>3</sub>) δ 0.85 (t, *J* = 7.0 Hz, 3 H), 1.19-1.27 (m, 6 H), 1.49-1.53 (m, 2 H), 2.16 (t, *J* = 7.4 Hz, 2 H), 2.34 (s, 3 H), 3.78 (s, 3 H), 6.61 (s, 1 H), 6.82 (d, *J* = 8.8 Hz, 2 H), 7.14 (d, *J* = 8.0 Hz, 2 H), 7.32 (d, *J* = 8.8 Hz, 2 H), 7.45 (d, *J* = 8.0 Hz, 2 H); <sup>13</sup>C NMR (100 MHz, CDCl<sub>3</sub>) δ 14.1, 21.2, 22.5, 28.5, 28.8, 31.6, 37.6, 55.3, 114.4, 124.2, 128.6, 129.1, 129.2, 134.1, 134.2, 136.6, 136.9, 159.2; IR (NaCl) 2954, 2928, 2856, 1592, 1571, 1509, 1493, 1463, 1440, 1286, 1246, 1180, 1172, 1034, 827, 806 cm<sup>-1</sup>; mass spectrum (EI) *m/e* 340 (M<sup>+</sup>, 100). HRMS calcd for C<sub>22</sub>H<sub>28</sub>OS: 340.1861. Found: 340.1871.

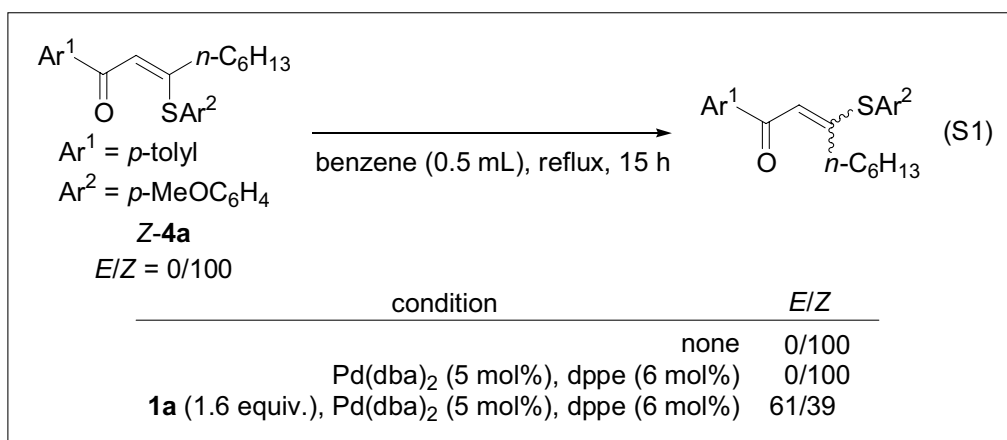

**Z-to-E Isomerization of Z-4a (eq S1) (Ref 16):** Into a two-necked reaction glass were added Pd(dba)<sub>2</sub> (1.5 mg, 0.0026 mmol), dppe (1.2 mg, 0.0030 mmol), **Z-4a** (17 mg, 0.044 mmol), **1a** (8.9 mg, 0.081 mmol) and

benzene (0.5 mL) under a N<sub>2</sub> atmosphere. After the solution was refluxed for 15 h, the reaction mixture was filtered through Celite, and the filtrate was evaporated and dried *in vacuo*. The products were analyzed by <sup>1</sup>H NMR spectroscopy.

*Z*-to-*E* Isomerization of *Z*-**4a** occurred in the presence of catalytic amount of Pd(dba)<sub>2</sub> and dppe and 1.6 equiv amount of **1a**. These results indicated that **1a** is the crucial factor for the generation of active dppe ligated Palladium (0) complex.

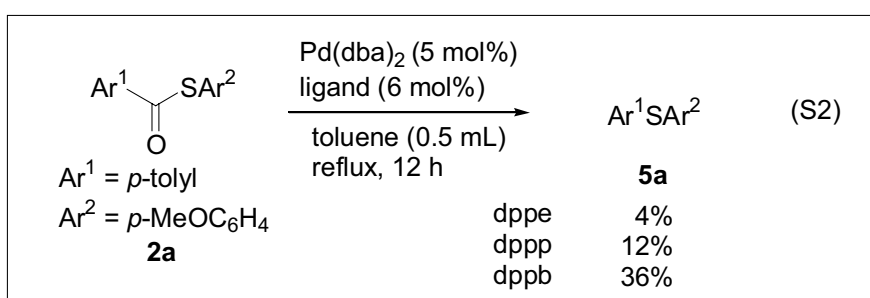

**Treatment of 2a in the Presence of Pd/dppe (eq S2) (Ref 18):** Into a two-necked reaction glass were added Pd(dba)<sub>2</sub> (28.3 mg, 0.05 mmol), dppe (24.5 mg, 0.06 mmol), **2a** (262 mg, 1.01 mmol) and toluene (0.5 mL) under a N<sub>2</sub> atmosphere. After the solution was refluxed for 12 h, the reaction mixture was filtered through Celite, the solvent was evaporated and the resultant crude product was dried *in vacuo*. The products were analyzed by <sup>1</sup>H NMR spectroscopy.

Decarbonylation of **2a** using dppp and dppb ligands was similarly examined.

***p*-CH<sub>3</sub>C<sub>6</sub>H<sub>4</sub>SC<sub>6</sub>H<sub>4</sub>*p*-OCH<sub>3</sub> (5a): RN: 6013-47-4.**

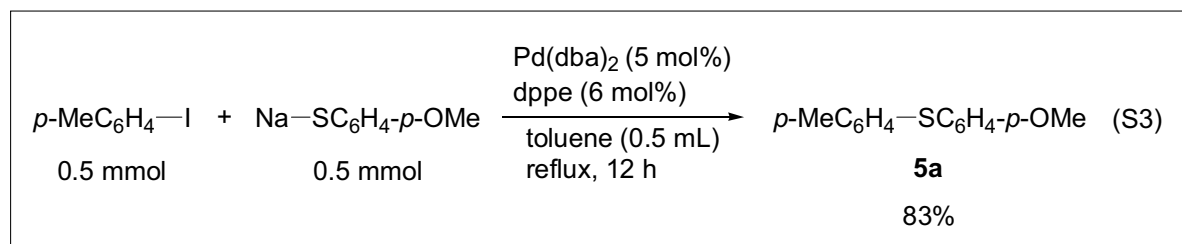

**Reaction of IC<sub>6</sub>H<sub>4</sub>*p*-OCH<sub>3</sub> with NaSC<sub>6</sub>H<sub>4</sub>*p*-OCH<sub>3</sub> in the Presence of Pd/dppe (eq S3) (Ref 18):** Into a two-necked reaction glass were added Pd(dba)<sub>2</sub> (14.4 mg, 0.025 mmol), dppe (12.0 mg, 0.030 mmol), *p*-

MeC<sub>6</sub>H<sub>4</sub>I (109 mg, 0.500 mmol), NaSC<sub>6</sub>H<sub>4</sub>OMe-*p* (82 mg, 0.506 mmol) and toluene (0.5 mL) under a N<sub>2</sub> atmosphere. After the solution was refluxed for 12 h, the reaction mixture was filtered through Celite, the solvent was evaporated and the resultant crude product was dried *in vacuo*. The products were analyzed by <sup>1</sup>H NMR spectroscopy.

**Reaction of F<sub>3</sub>CC(O)SC<sub>6</sub>H<sub>4</sub>-*p*-CH<sub>3</sub> (7a) with 1-Octyne (1a) in the Presence of Pt(PPh<sub>3</sub>)<sub>4</sub> (Entry 3 of Table 3, Entry 1 of Table 4): General Procedure of Platinum-Catalyzed Trifluoroacetylthiolation of Alkynes Using Thioesters:** Into a two-necked 3 mL reaction glass were added Pt(PPh<sub>3</sub>)<sub>4</sub> (31.1 mg, 0.025 mmol), 7a (108 mg, 0.492 mmol), 1a (82.0 mg, 0.74 mmol) and xylene (0.5 mL) under a N<sub>2</sub> atmosphere. After the solution was refluxed for 10 h, the reaction mixture was filtered through Celite, the solvent was evaporated and the resultant crude product was dried *in vacuo*. *Z*-8a and *E*-8a were obtained in 14% (23.2 mg) and 64% (106 mg) yields by preparative TLC using hexane as an eluent.

**(*E*)-F<sub>3</sub>CC(O)C(H)=C(*n*-C<sub>6</sub>H<sub>13</sub>)SC<sub>6</sub>H<sub>4</sub>-*p*-CH<sub>3</sub> (*E*-8a):** pale yellow oil; <sup>1</sup>H NMR (400 MHz, CDCl<sub>3</sub>) δ 0.91 (t, *J* = 7.1 Hz, 3 H), 1.32-1.48 (m, 6 H), 1.66 (tt, 2 H), 2.42 (s, 3 H), 2.89 (t, *J* = 7.6 Hz, 2 H), 5.74 (s, 1 H), 7.29 (d, *J* = 8.1 Hz, 2 H), 7.37 (d, *J* = 8.1 Hz, 2 H); NOE experiment: Irradiation of the singlet of vinylic proton at δ 5.75 resulted in 2.7% enhancement of the signal at δ 7.37 (aryl doublet) and the triplet of allylic proton at δ 2.89 resulted in 0.58% enhancement of the signal at δ 7.37 (aryl doublet); <sup>13</sup>C NMR (100 MHz, CDCl<sub>3</sub>) δ 14.6, 22.0, 23.1, 29.8, 30.2, 32.0, 36.0, 108.5, 113.9 (q, *J*<sub>C-F</sub> = 291 Hz), 125.2, 131.5, 135.6, 141.8, 176.2 (q, *J*<sub>C-F</sub> = 33.5 Hz), 180.9; IR (NaCl) 2957, 2929, 2838, 1700, 1597, 1560, 1493, 1458, 1436, 1291, 1202, 1143, 1077, 1018, 842, 811, 725, 686 cm<sup>-1</sup>; mass spectrum (EI) *m/z* 330 (M<sup>+</sup>, 42); HRMS calcd for C<sub>17</sub>H<sub>21</sub>F<sub>3</sub>OS 330.1265, found 330.1270 Anal. Calcd for C<sub>17</sub>H<sub>21</sub>F<sub>3</sub>OS: C, 61.80; H, 6.41. Found: C, 62.09; H, 6.69.

**(*Z*)-F<sub>3</sub>CC(O)C(H)=C(*n*-C<sub>6</sub>H<sub>13</sub>)SC<sub>6</sub>H<sub>4</sub>-*p*-CH<sub>3</sub> (*Z*-8a):** yellow oil; <sup>1</sup>H NMR (400 MHz, CDCl<sub>3</sub>) δ 0.81 (t, *J* = 6.8 Hz, 3 H), 1.05-1.12 (m, 6 H), 1.35-1.40 (m, 2 H), 2.25 (t, *J* = 7.8 Hz, 2 H), 2.40 (s, 1 H), 6.51 (s, 1 H), 7.23 (d, *J* = 7.8 Hz, 2 H), 7.41 (d, *J* = 7.8 Hz, 2 H); NOE experiment: Irradiation of the triplet of allylic

proton at  $\delta$  2.25 resulted in 3.8% enhancement of the signal at  $\delta$  7.41 (aryl doublet) and 8.4% enhancement of the signal at  $\delta$  6.51 (vinylic singlet);  $^{13}\text{C}$  NMR (100 MHz,  $\text{CDCl}_3$ )  $\delta$  13.9, 21.3, 22.3, 28.5, 29.9, 31.1, 37.5, 110.2, 116.4 (q,  $J_{\text{C-F}} = 290$  Hz), 125.7, 130.2, 135.4, 140.6, 177.3 (q,  $J_{\text{C-F}} = 34.4$  Hz), 178.0; IR (NaCl) 2931, 2860, 2359, 1681, 1674, 1598, 1563, 1548, 1538, 1532, 1520, 1506, 1494, 1463, 1456, 1362, 1300, 1199, 1146, 1105, 1018, 864, 813, 729, 686  $\text{cm}^{-1}$ ; mass spectrum (EI)  $m/z$  330 ( $\text{M}^+$ , 41); Anal. Calcd for  $\text{C}_{17}\text{H}_{21}\text{F}_3\text{OS}$ : C, 61.80; H, 6.41. Found: C, 62.02; H, 6.66.

Other trifluoroacetylthiolation products **8d-l** were synthesized by similar procedures.

**(E)-F<sub>3</sub>CC(O)C(H)=C(*n*-C<sub>6</sub>H<sub>13</sub>)SC<sub>6</sub>H<sub>4</sub>-*p*-OCH<sub>3</sub> (E-8d) (Entry 2 of Table 4):** pale yellow oil;  $^1\text{H}$  NMR (400 MHz,  $\text{CDCl}_3$ )  $\delta$  0.91 (t,  $J = 6.6$  Hz, 3 H), 1.33-1.46 (m, 6 H), 1.64 (tt, 2 H), 2.88 (t,  $J = 7.6$  Hz, 2 H), 5.73 (s, 1 H), 7.00 (d,  $J = 8.8$  Hz, 2 H), 7.40 (d,  $J = 8.8$  Hz, 2 H);  $^{13}\text{C}$  NMR (100 MHz,  $\text{CDCl}_3$ )  $\delta$  14.1, 22.5, 29.3, 29.6, 31.4, 35.3, 55.4, 107.8, 115.6, 116.3 (q,  $J_{\text{C-F}} = 291$  Hz), 118.7, 136.7, 161.5, 175.4 (q,  $J_{\text{C-F}} = 33.5$  Hz), 180.9; IR (NaCl) 2958, 2930, 2858, 1697, 1593, 1560, 1553, 1496, 1465, 1441, 1292, 1254, 1202, 1174, 1143, 1106, 1077, 1031, 860, 831, 800, 726, 686  $\text{cm}^{-1}$ ; mass spectrum (EI)  $m/z$  346 ( $\text{M}^+$ , 58); Anal. Calcd for  $\text{C}_{17}\text{H}_{21}\text{F}_3\text{O}_2\text{S}$ : C, 58.94; H, 6.11. Found: C, 58.88; H, 6.09.

**(Z)-F<sub>3</sub>CC(O)C(H)=C(*n*-C<sub>6</sub>H<sub>13</sub>)SC<sub>6</sub>H<sub>4</sub>-*p*-OCH<sub>3</sub> (Z-8d) (Entry 2 of Table 4):** yellow oil;  $^1\text{H}$  NMR (400 MHz,  $\text{CDCl}_3$ )  $\delta$  0.82 (t,  $J = 7.1$  Hz, 3 H), 1.08-1.19 (m, 6 H), 1.39 (b, 2 H), 2.24 (t,  $J = 7.8$  Hz, 2 H), 3.85 (s, 3 H), 6.51 (s, 1 H), 6.95 (d,  $J = 8.6$  Hz, 2 H), 7.44 (d,  $J = 78.6$  Hz, 2 H);  $^{13}\text{C}$  NMR (100 MHz,  $\text{CDCl}_3$ )  $\delta$  13.9, 22.3, 28.5, 29.9, 31.1, 37.5, 55.4, 110.1, 114.9, 116.4 (q,  $J_{\text{C-F}} = 289$  Hz), 119.8, 137.0, 161.2, 177.2 (q,  $J_{\text{C-F}} = 33.9$  Hz), 178.7; IR (NaCl) 2958, 2931, 2859, 1682, 1593, 1572, 1538, 1495, 1464, 1442, 1408, 1364, 1308, 1291, 1199, 1174, 1144, 1105, 1031, 864, 832, 729  $\text{cm}^{-1}$ ; mass spectrum (EI)  $m/z$  346 ( $\text{M}^+$ , 69); Anal. Calcd for  $\text{C}_{17}\text{H}_{21}\text{F}_3\text{O}_2\text{S}$ : C, 58.94; H, 6.11. Found: C, 59.05; H, 6.02.

**(E)-F<sub>3</sub>CC(O)C(H)=C(*n*-C<sub>6</sub>H<sub>13</sub>)SC<sub>6</sub>H<sub>5</sub> (E-8e) (Entry 3 of Table 4):** pale yellow oil;  $^1\text{H}$  NMR (400 MHz,  $\text{CDCl}_3$ )  $\delta$  0.91 (t,  $J = 6.6$  Hz, 3 H), 1.33-1.49 (m, 6 H), 1.66 (tt, 2 H), 2.90 (t,  $J = 7.8$  Hz, 2 H), 5.72 (s, 1 H),

7.50 (b, 5 H);  $^{13}\text{C}$  NMR (100 MHz,  $\text{CDCl}_3$ )  $\delta$  14.1, 22.5, 29.2, 29.6, 31.4, 35.4, 108.1, 116.2 (q,  $J_{\text{C-F}} = 291$  Hz), 128.1, 130.1, 130.8, 135.2, 175.5 (q,  $J_{\text{C-F}} = 33.4$  Hz), 179.7; IR (NaCl) 2958, 2930, 2859, 1699, 1560, 1477, 1442, 1291, 1203, 1143, 1077, 1024, 837, 750, 706, 685  $\text{cm}^{-1}$ ; mass spectrum (EI)  $m/z$  316 ( $\text{M}^+$ , 26); Anal. Calcd for  $\text{C}_{16}\text{H}_{19}\text{F}_3\text{O}_2\text{S}$ : C, 60.74; H, 6.05. Found: C, 60.53; H, 6.05.

**(Z)-F<sub>3</sub>CC(O)C(H)=C(*n*-C<sub>6</sub>H<sub>13</sub>)SC<sub>6</sub>H<sub>5</sub> (Z-8e) (Entry 3 of Table 4):** yellow oil;  $^1\text{H}$  NMR (400 MHz,  $\text{CDCl}_3$ )  $\delta$  0.80 (t,  $J = 6.7$  Hz, 3 H), 1.05-1.17 (m, 6 H), 1.39 (m, 2 H), 2.25 (t,  $J = 7.6$  Hz, 2 H), 6.53 (s, 1 H), 7.43-7.56 (m, 5 H);  $^{13}\text{C}$  NMR (100 MHz,  $\text{CDCl}_3$ )  $\delta$  13.9, 22.3, 28.6, 29.9, 31.1, 37.7, 110.5, 116.5 (q,  $J_{\text{C-F}} = 292$  Hz), 129.3, 129.5, 130.2, 135.6, 177.2, 177.4 (q,  $J_{\text{C-F}} = 34.4$  Hz); IR (NaCl) 2958, 2931, 2860, 1682, 1537, 1477, 1468, 1441, 1364, 1300, 1261, 1200, 1145, 1106, 1024, 862, 818, 752, 730, 706, 692  $\text{cm}^{-1}$ ; mass spectrum (EI)  $m/z$  316 ( $\text{M}^+$ , 30); HRMS calcd for  $\text{C}_{16}\text{H}_{19}\text{F}_3\text{OS}$ : 316.1109. Found: 316.1112.

**(E)-F<sub>3</sub>CC(O)C(H)=C(*n*-C<sub>6</sub>H<sub>13</sub>)SC<sub>6</sub>H<sub>4</sub>-*p*-Cl (E-8f) (Entry 4 of Table 4):** pale yellow oil;  $^1\text{H}$  NMR (400 MHz,  $\text{CDCl}_3$ )  $\delta$  0.91 (t,  $J = 6.6$  Hz, 3 H), 1.31-1.48 (m, 6 H), 1.68 (m, 2 H), 2.88 (t,  $J = 7.8$  Hz, 2 H), 5.73 (s, 1 H), 7.44 (d,  $J = 8.6$  Hz, 2 H), 7.48 (d,  $J = 8.6$  Hz, 2 H);  $^{13}\text{C}$  NMR (100 MHz,  $\text{CDCl}_3$ )  $\delta$  14.1, 22.6, 29.2, 29.6, 31.4, 35.3, 108.3, 116.2 (q,  $J_{\text{C-F}} = 291$  Hz), 126.6, 130.5, 136.5, 137.4, 175.6 (q,  $J_{\text{C-F}} = 33.5$  Hz), 178.8; IR (NaCl) 2958, 2930, 2859, 1698, 1682, 1574, 1568, 1556, 1477, 1454, 1436, 1392, 1292, 1204, 1146, 1096, 1076, 1014, 859, 839, 825, 749, 726, 684  $\text{cm}^{-1}$ ; mass spectrum (EI)  $m/z$  350 ( $\text{M}^+$ , 41); Anal. Calcd for  $\text{C}_{16}\text{H}_{18}\text{ClF}_3\text{OS}$ : C, 54.78; H, 5.17. Found: C, 54.68; H, 5.13.

**(Z)-F<sub>3</sub>CC(O)C(H)=C(*n*-C<sub>6</sub>H<sub>13</sub>)SC<sub>6</sub>H<sub>4</sub>-*p*-Cl (Z-8f) (Entry 4 of Table 4):** pale yellow oil;  $^1\text{H}$  NMR (400 MHz,  $\text{CDCl}_3$ )  $\delta$  0.83 (t,  $J = 7.3$  Hz, 3 H), 1.07-1.43 (m, 8 H), 2.24 (t,  $J = 7.6$  Hz, 2 H), 6.54 (s, 1 H), 7.42 (d,  $J = 8.3$  Hz, 2 H), 7.49 (d,  $J = 8.3$  Hz, 2 H);  $^{13}\text{C}$  NMR (100 MHz,  $\text{CDCl}_3$ )  $\delta$  13.9, 22.3, 28.5, 29.7, 31.1, 37.6, 110.8, 116.3 (q,  $J_{\text{C-F}} = 289$  Hz), 127.7, 129.7, 136.8, 136.8, 176.1, 177.5 (q,  $J_{\text{C-F}} = 34.4$  Hz); IR (NaCl) 2958, 2931, 2859, 1682, 1574, 1538, 1476, 1389, 1364, 1296, 1201, 1176, 1146, 1107, 1093, 1014, 865, 824, 748, 728, 684  $\text{cm}^{-1}$ ; mass spectrum (EI)  $m/z$  350 ( $\text{M}^+$ , 39); HRMS calcd for  $\text{C}_{16}\text{H}_{18}\text{ClF}_3\text{OS}$ : 350.0719. Found: 350.0714.



**(E)-F<sub>3</sub>CC(O)C(H)=C(*n*-C<sub>6</sub>H<sub>13</sub>)SCH<sub>2</sub>C<sub>6</sub>H<sub>5</sub> (E-8g) (Entry 5 of Table 4):** pale yellow oil; <sup>1</sup>H NMR (400 MHz, CDCl<sub>3</sub>) δ 0.88 (t, *J* = 6.8 Hz, 3 H), 1.29-1.41 (m, 6 H), 1.57 (tt, 2 H), 2.83 (t, *J* = 7.8 Hz, 2 H), 4.09 (s, 2 H), 6.17 (s, 1 H), 7.30-7.37 (m, 5 H); <sup>13</sup>C NMR (100 MHz, CDCl<sub>3</sub>) δ 14.1, 22.5, 29.2, 29.7, 31.4, 36.2, 37.3, 106.9, 116.5 (q, *J*<sub>C-F</sub> = 291 Hz), 128.1, 128.9, 129.0, 133.6, 174.9 (q, *J*<sub>C-F</sub> = 32.3 Hz), 178.1; IR (NaCl) 2957, 2930, 2858, 1698, 1552, 1496, 1455, 1435, 1295, 1203, 1142, 1079, 822, 711, 696 cm<sup>-1</sup>; mass spectrum (EI) *m/z* 330 (M<sup>+</sup>, 2.2); Anal. Calcd for C<sub>17</sub>H<sub>21</sub>F<sub>3</sub>OS: C, 61.80; H, 6.41. Found: C, 61.67; H, 6.42.

**(E)-F<sub>3</sub>CC(O)C(H)=C(*n*-C<sub>6</sub>H<sub>13</sub>)S-*n*-C<sub>10</sub>H<sub>21</sub> (E-8h) (Entry 6 of Table 4):** pale yellow oil; <sup>1</sup>H NMR (400 MHz, CDCl<sub>3</sub>) δ 0.88 (b, 6 H), 1.27-1.42 (m, 20 H), 1.57 (tt, 2 H), 1.70 (tt, 2 H), 2.82-2.85 (m, 4 H), 6.01 (s, 1 H); <sup>13</sup>C NMR (100 MHz, CDCl<sub>3</sub>) δ 14.0, 14.1, 22.5, 22.7, 27.0, 28.9, 29.0, 29.2, 29.3, 29.4, 29.5, 29.8, 31.4, 31.9, 32.2, 36.6, 106.2, 116.6 (q, *J*<sub>C-F</sub> = 292 Hz), 174.7 (q, *J*<sub>C-F</sub> = 33.0 Hz), 179.3; IR (NaCl) 2957, 2927, 2856, 1698, 1556, 1467, 1434, 1293, 1201, 1143, 1079, 860, 824, 724, 693 cm<sup>-1</sup>; mass spectrum (EI) *m/z* 380 (M<sup>+</sup>, 8.5); Anal. Calcd for C<sub>20</sub>H<sub>35</sub>F<sub>3</sub>OS: C, 63.12; H, 9.27. Found: C, 63.18; H, 9.23.

**(E)-F<sub>3</sub>CC(O)C(H)=C((CH<sub>2</sub>)<sub>4</sub>Cl)SC<sub>6</sub>H<sub>5</sub> (E-8i) (Entry 7 of Table 4):** yellow oil; <sup>1</sup>H NMR (400 MHz, CDCl<sub>3</sub>) δ 1.79-1.86 (tt, 2 H), 1.90-1.97 (tt, 2 H), 2.93 (t, *J* = 7.8 Hz, 2 H), 3.59 (t, *J* = 6.4 Hz, 2 H), 5.76 (s, 1 H), 7.5-7.54 (m, 5 H); <sup>13</sup>C NMR (100 MHz, CDCl<sub>3</sub>) δ 26.9, 32.1, 34.4, 44.4, 108.5, 116.1 (q, *J*<sub>C-F</sub> = 291 Hz), 127.8, 130.2, 130.9, 135.2, 175.6 (q, *J*<sub>C-F</sub> = 33.9 Hz), 178.5; IR (NaCl) 3063, 2957, 2868, 1698, 1556, 1477, 1442, 1292, 1203, 1143, 1077, 1024, 838, 750, 706, 686, cm<sup>-1</sup>; mass spectrum (EI) *m/z* 322 (M<sup>+</sup>, 45); Anal. Calcd for C<sub>14</sub>H<sub>14</sub>ClF<sub>3</sub>OS: C, 52.10; H, 4.37. Found: C, 52.37; H, 4.41.

**(Z)-F<sub>3</sub>CC(O)C(H)=C((CH<sub>2</sub>)<sub>4</sub>Cl)SC<sub>6</sub>H<sub>5</sub> (Z-8i) (Entry 7 of Table 4):** yellow oil; <sup>1</sup>H NMR (400 MHz, CDCl<sub>3</sub>) δ 1.53-1.57 (m, 4 H), 2.29 (t, *J* = 7.2 Hz, 2 H), 3.34 (t, *J* = 6.0 Hz, 2 H), 6.54 (s, 1 H), 7.45-7.57 (m, 5 H); <sup>13</sup>C NMR (100 MHz, CDCl<sub>3</sub>) δ 27.0, 31.5, 36.8, 44.0, 110.7, 116.3 (q, *J*<sub>C-F</sub> = 289 Hz), 129.0, 129.6, 130.4, 135.5, 175.8, 177.4 (q, *J*<sub>C-F</sub> = 33.8 Hz); IR (NaCl) 3025, 2957, 2869, 1682, 1577, 1534, 1493, 1458,

1446, 1364, 1302, 1200, 1146, 1110, 1092, 1018, 863, 813, 729, 687, 654  $\text{cm}^{-1}$ ; mass spectrum (EI)  $m/z$  322 ( $M^+$ , 54); HRMS calcd for  $\text{C}_{17}\text{H}_{21}\text{F}_3\text{OS}$ : 322.0406. Found: 322.0399.

**(E)-F<sub>3</sub>CC(O)C(H)=C((CH<sub>2</sub>)<sub>3</sub>CN)SC<sub>6</sub>H<sub>5</sub> (E-8j) (Entry 8 of Table 4):** pale yellow solid; mp 64-66 °C; <sup>1</sup>H NMR (400 MHz, CDCl<sub>3</sub>)  $\delta$  2.05 (m, 2 H), 2.53 (t,  $J = 6.8$  Hz, 2 H), 3.01 (t,  $J = 6.8$  Hz, 2 H), 5.80 (s, 1 H), 7.53 (b, 5 H); <sup>13</sup>C NMR (100 MHz, CDCl<sub>3</sub>)  $\delta$  17.0, 25.2, 34.0, 109.3, 116.1 (q,  $J_{\text{C-F}} = 294$  Hz), 118.9, 127.5, 130.4, 131.2, 135.2, 176.0 (q,  $J_{\text{C-F}} = 34.4$  Hz), 176.2; IR (NaCl) 3064, 2954, 2244, 1687, 1548, 1478, 1453, 1439, 1294, 1274, 1188, 1145, 1078, 1025, 999, 868, 854, 840, 766, 749, 708, 685, 574, 452  $\text{cm}^{-1}$ ; mass spectrum (EI)  $m/z$  299 ( $M^+$ , 47); Anal. Calcd for  $\text{C}_{14}\text{H}_{12}\text{F}_3\text{NOS}$ : C, 56.18; H, 4.04; N, 4.68. Found: C, 56.18; H, 3.98; N, 4.73.

**(Z)-F<sub>3</sub>CC(O)C(H)=C((CH<sub>2</sub>)<sub>3</sub>CN)SC<sub>6</sub>H<sub>5</sub> (Z-8j) (Entry 8 of Table 4):** yellow oil; <sup>1</sup>H NMR (400 MHz, CDCl<sub>3</sub>)  $\delta$  1.73 (tt,  $J = 7.0, 7.8$  Hz, 2 H), 2.16 (t,  $J = 7.0$  Hz, 2 H), 2.45 (t,  $J = 7.8$  Hz, 2 H), 6.56 (s, 1 H), 7.45-7.57 (m, 5 H); <sup>13</sup>C NMR (100 MHz, CDCl<sub>3</sub>)  $\delta$  16.7, 25.5, 36.4, 111.7, 116.5 (q,  $J_{\text{C-F}} = 289$  Hz), 118.5, 128.9, 130.1, 131.0, 135.7, 173.4, 177.8 (q,  $J_{\text{C-F}} = 34.8$  Hz); IR (NaCl) 3062, 2947, 2248, 1602, 1578, 1478, 1456, 1442, 1368, 1304, 1202, 1143, 1111, 1024, 1002, 865, 818, 754, 730, 706, 694  $\text{cm}^{-1}$ ; mass spectrum (EI)  $m/z$  299 ( $M^+$ , 33); HRMS calcd for  $\text{C}_{14}\text{H}_{12}\text{F}_3\text{NOS}$ : 299.0592. Found: 299.0590.

**(E)-F<sub>3</sub>CC(O)C(H)=C((CH<sub>2</sub>)<sub>3</sub>CO<sub>2</sub>CH<sub>3</sub>)SC<sub>6</sub>H<sub>5</sub> (E-8k) (Entry 9 of Table 4):** pale yellow oil; <sup>1</sup>H NMR (400 MHz, CDCl<sub>3</sub>)  $\delta$  2.01 (tt, 2 H), 2.48 (t,  $J = 7.6$  Hz, 2 H), 2.96 (t,  $J = 7.8$  Hz, 2 H), 3.70 (s, 3 H), 5.75 (s, 1 H), 7.50-7.54 (b, 5 H); <sup>13</sup>C NMR (100 MHz, CDCl<sub>3</sub>)  $\delta$  24.6, 33.3, 34.2, 51.7, 108.7, 116.1 (q,  $J_{\text{C-F}} = 291$  Hz), 127.8, 130.2, 130.9, 135.2, 173.3, 175.6 (q,  $J_{\text{C-F}} = 33.5$  Hz), 178.0; IR (NaCl) 3063, 2953, 1738, 1732, 1698, 1565, 1556, 1477, 1441, 1368, 1293, 1255, 1204, 1142, 1076, 1024, 1000, 838, 752, 706, 689  $\text{cm}^{-1}$ ; mass spectrum (EI)  $m/z$  332 ( $M^+$ , 13); Anal. Calcd for  $\text{C}_{15}\text{H}_{15}\text{F}_3\text{O}_3\text{S}$ : C, 54.21; H, 4.55. Found: C, 54.21; H, 4.49.

**(Z)-F<sub>3</sub>CC(O)C(H)=C((CH<sub>2</sub>)<sub>3</sub>CO<sub>2</sub>CH<sub>3</sub>)SC<sub>6</sub>H<sub>5</sub> (Z-8k) (Entry 9 of Table 4):** yellow oil; <sup>1</sup>H NMR (400 MHz, CDCl<sub>3</sub>)  $\delta$  1.72 (tt, 2 H), 2.11 (t,  $J = 7.2$  Hz, 2 H), 2.32 (t,  $J = 7.8$  Hz, 2 H), 3.60 (s, 3 H), 6.55 (s, 1 H), 7.42-

7.56 (m, 5 H);  $^{13}\text{C}$  NMR (100 MHz,  $\text{CDCl}_3$ )  $\delta$  24.7, 32.6, 36.5, 51.5, 110.8, 116.3 (q,  $J_{\text{C-F}} = 289$  Hz), 128.9, 129.5, 130.3, 135.4, 172.7, 175.3, 177.3 (q,  $J_{\text{C-F}} = 34.4$  Hz); IR (NaCl) 3062, 2953, 1738, 1682, 1538, 1478, 1440, 1366, 1300, 1254, 1201, 1146, 1111, 1091, 1024, 1001, 887, 856, 838, 820, 754, 730, 706, 693  $\text{cm}^{-1}$ ; mass spectrum (EI)  $m/z$  332 ( $\text{M}^+$ , 16); Anal. Calcd for  $\text{C}_{15}\text{H}_{15}\text{F}_3\text{O}_3\text{S}$ : C, 54.21; H, 4.55. Found: C, 54.01; H, 4.55.

**(E)-F<sub>3</sub>CC(O)C(H)=C(CH<sub>2</sub>(*c*-C<sub>5</sub>H<sub>9</sub>))SC<sub>6</sub>H<sub>5</sub> (E-8I) (Entry 10 of Table 4):** pale yellow oil;  $^1\text{H}$  NMR (400 MHz,  $\text{CDCl}_3$ )  $\delta$  1.31 (m 2 H), 1.55-1.69 (m, 4 H), 1.87 (m, 2 H), 2.21 (m, 1 H), 3.00 (d,  $J = 7.3$  Hz, 2 H), 5.71 (s, 1 H), 7.51 (b, 5 H);  $^{13}\text{C}$  NMR (100 MHz,  $\text{CDCl}_3$ )  $\delta$  24.8, 32.5, 40.5, 40.5, 108.5, 116.3 (q,  $J_{\text{C-F}} = 294$  Hz), 128.4, 130.2, 130.8, 135.2, 175.7 (q,  $J_{\text{C-F}} = 33.6$  Hz), 179.2; IR (NaCl) 3063, 2953, 2869, 1808, 1556, 1476, 1441, 1296, 1201, 1142, 1077, 1024, 846, 837, 749, 707, 690  $\text{cm}^{-1}$ ; mass spectrum (EI)  $m/z$  314 ( $\text{M}^+$ , 22); Anal. Calcd for  $\text{C}_{16}\text{H}_{17}\text{F}_3\text{OS}$ : C, 61.13; H, 5.45. Found: C, 60.94; H, 5.38.

**(Z)-F<sub>3</sub>CC(O)C(H)=C(CH<sub>2</sub>(*c*-C<sub>5</sub>H<sub>9</sub>))SC<sub>6</sub>H<sub>5</sub> (Z-8I) (Entry 10 of Table 4):** yellow oil;  $^1\text{H}$  NMR (400 MHz,  $\text{CDCl}_3$ )  $\delta$  0.94 (m, 2 H), 1.47-1.57 (m, 6 H), 1.87 (m, 1 H), 2.27 (d,  $J = 7.1$  Hz, 2 H), 6.54 (s, 1 H), 7.43-7.55 (m, 5 H);  $^{13}\text{C}$  NMR (100 MHz,  $\text{CDCl}_3$ )  $\delta$  24.6, 32.1, 39.8, 43.4, 110.9, 116.4 (q,  $J_{\text{C-F}} = 300$  Hz), 129.4, 130.1, 135.2, 135.6, 176.2, 177.2 (q,  $J_{\text{C-F}} = 33.9$  Hz); IR (NaCl) 3062, 2953, 2869, 1682, 1538, 1477, 1441, 1367, 1345, 1296, 1200, 1144, 1110, 1070, 1024, 1002, 863, 819, 752, 730, 706, 693  $\text{cm}^{-1}$ ; mass spectrum (EI)  $m/z$  314 ( $\text{M}^+$ , 26); Anal. Calcd for  $\text{C}_{16}\text{H}_{17}\text{F}_3\text{OS}$ : C, 61.13; H, 5.45. Found: C, 61.28; H, 5.54.

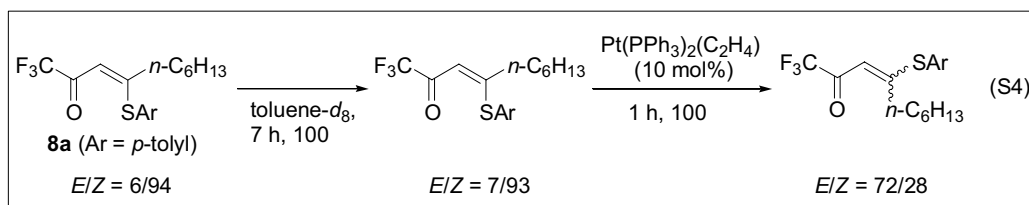

**Z-to-E Isomerization of 8a in Toluene-*d*<sub>8</sub> (eq S4) (Ref 20):** Into a dry Pyrex NMR tube were added **8a** ( $E/Z = 6/94$ ) (0.0506 mmol), 1,4-dioxane (0.0585 mmol as an internal standard) and 0.5 mL of toluene-*d*<sub>8</sub> under  $\text{N}_2$  atmosphere. Then the sample was heated at 100  $^\circ\text{C}$  for 7 h; however, isomerization was hardly

confirmed by  $^1\text{H}$  NMR spectroscopy ( $E/Z = 7/93$ ). Additional heating after the addition of  $\text{Pt}(\text{PPh}_3)_2(\text{C}_2\text{H}_4)$  (0.006 mmol) resulted in the formation of *E*-**8a** ( $E/Z = 72/28$ ).

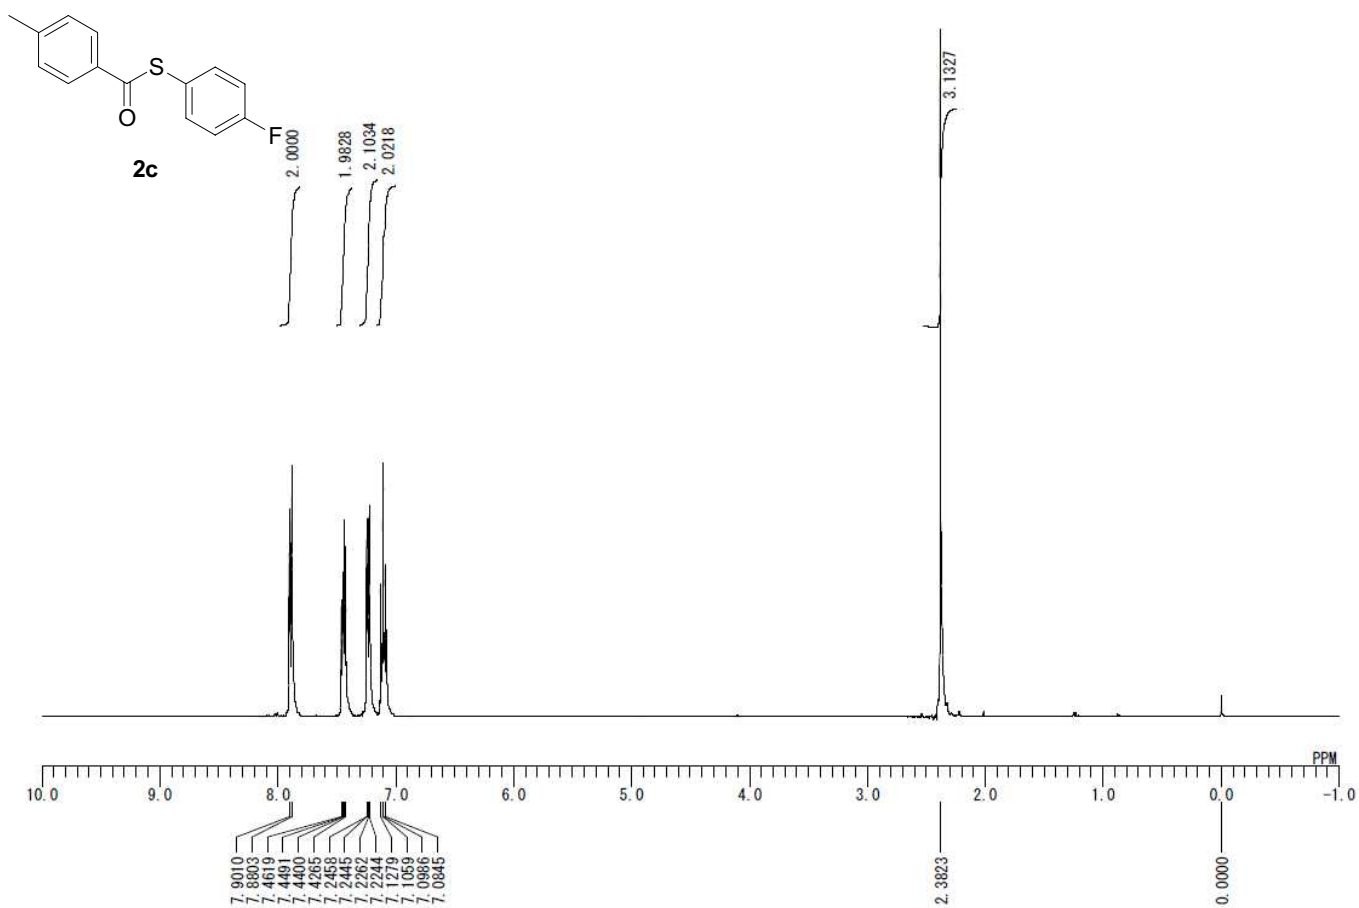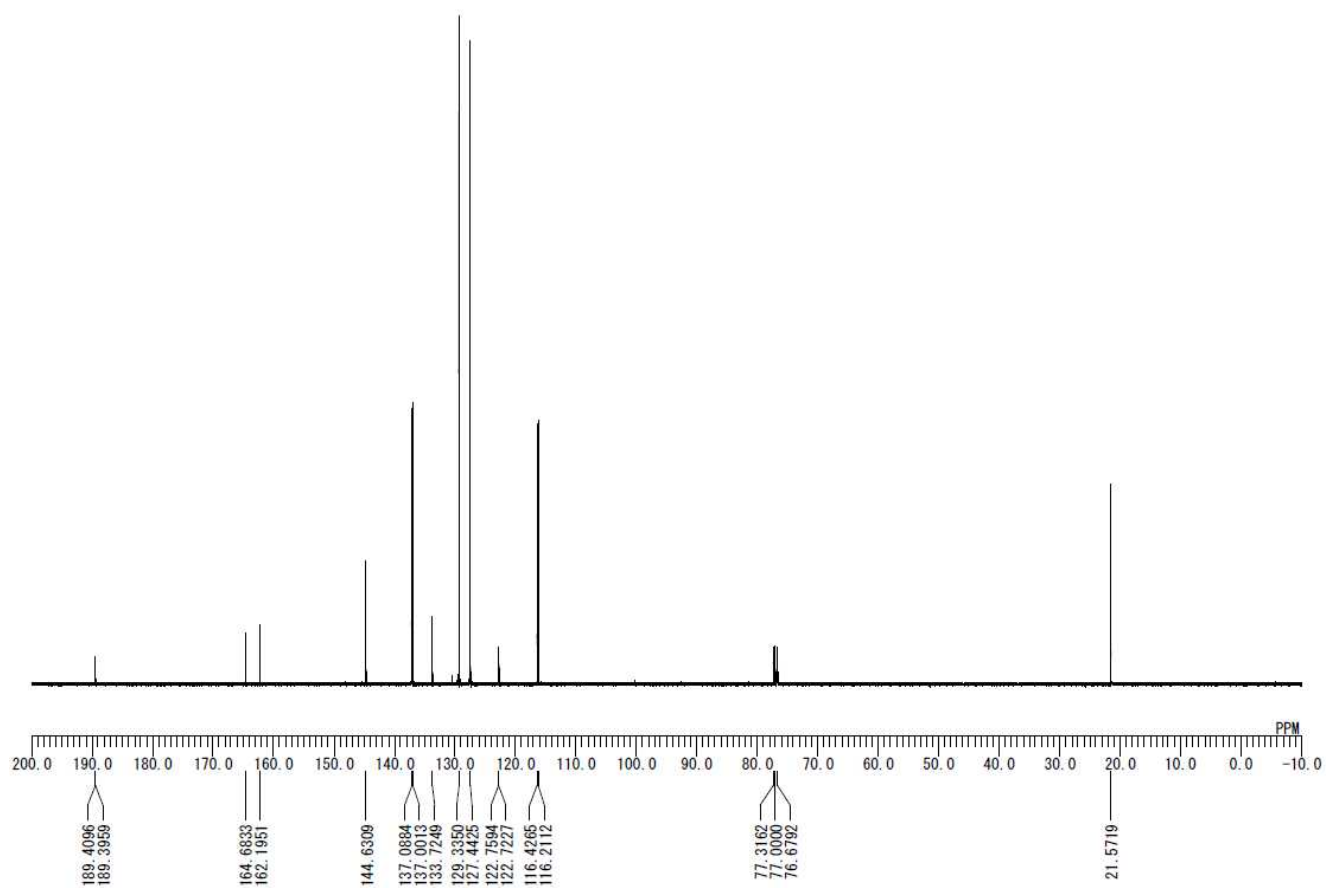

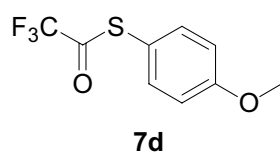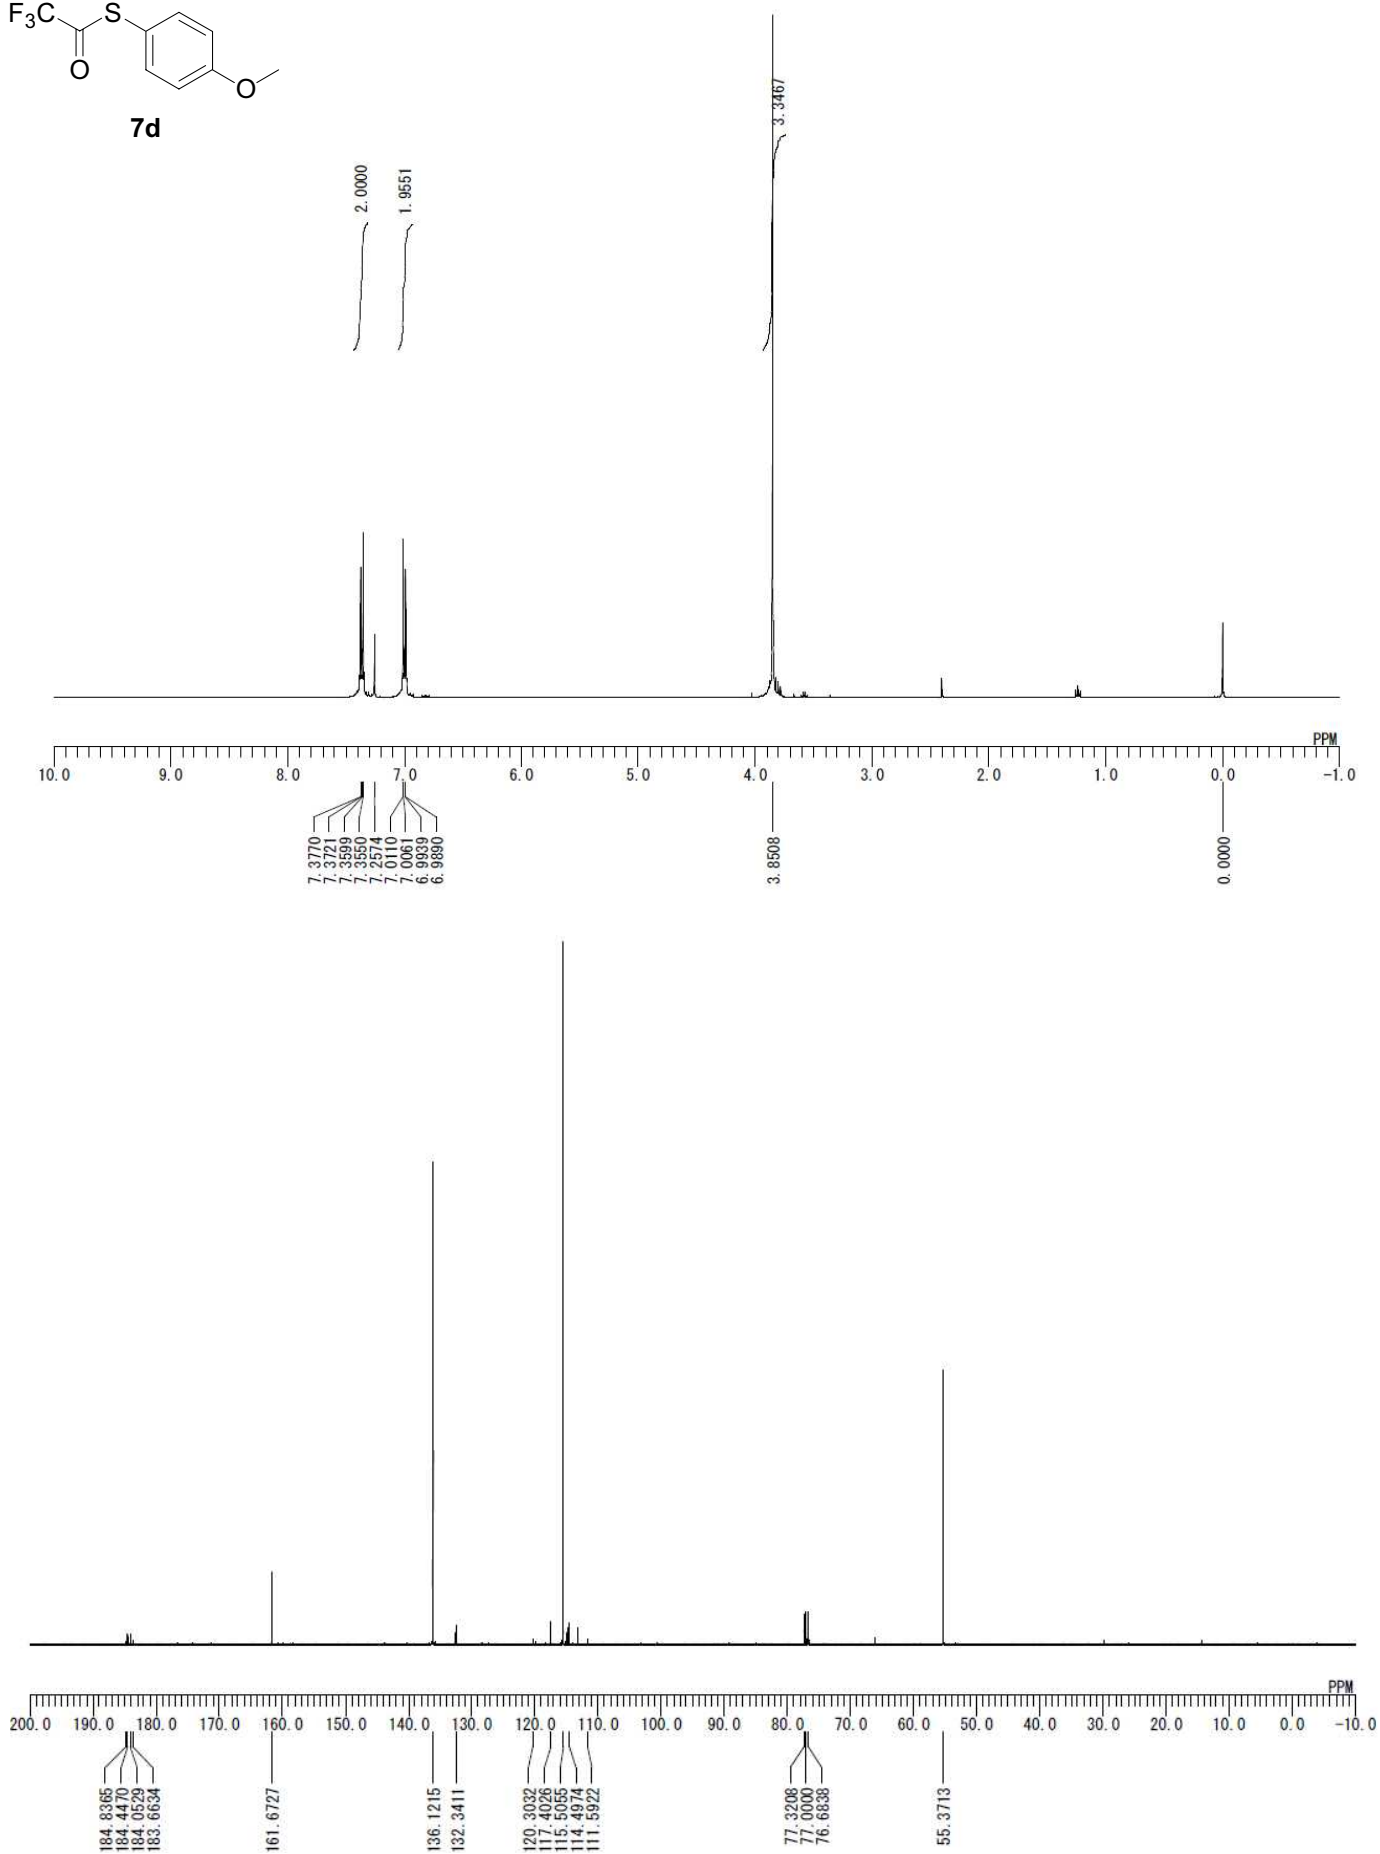

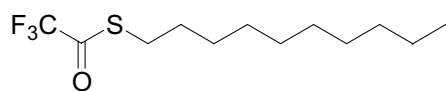

7h

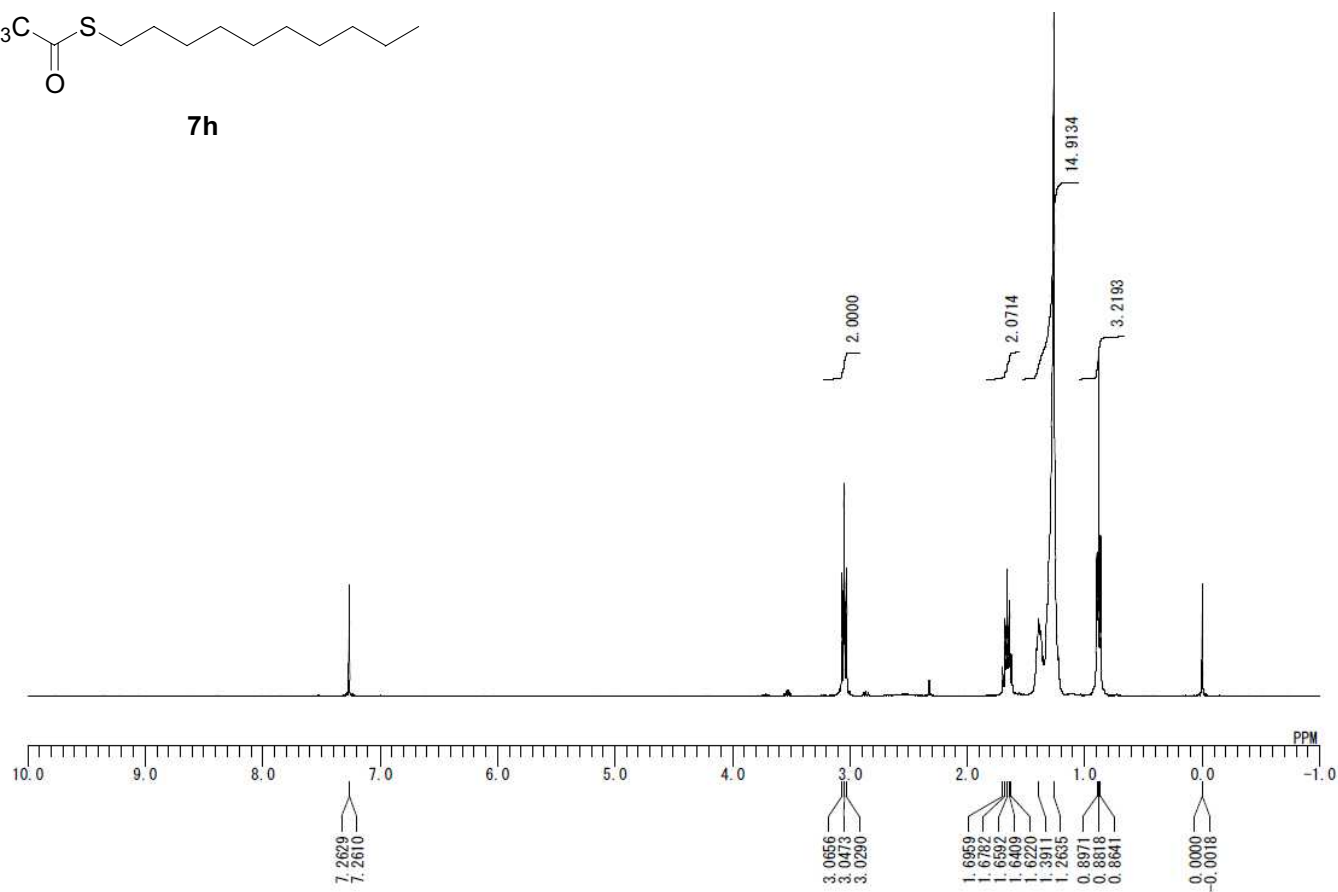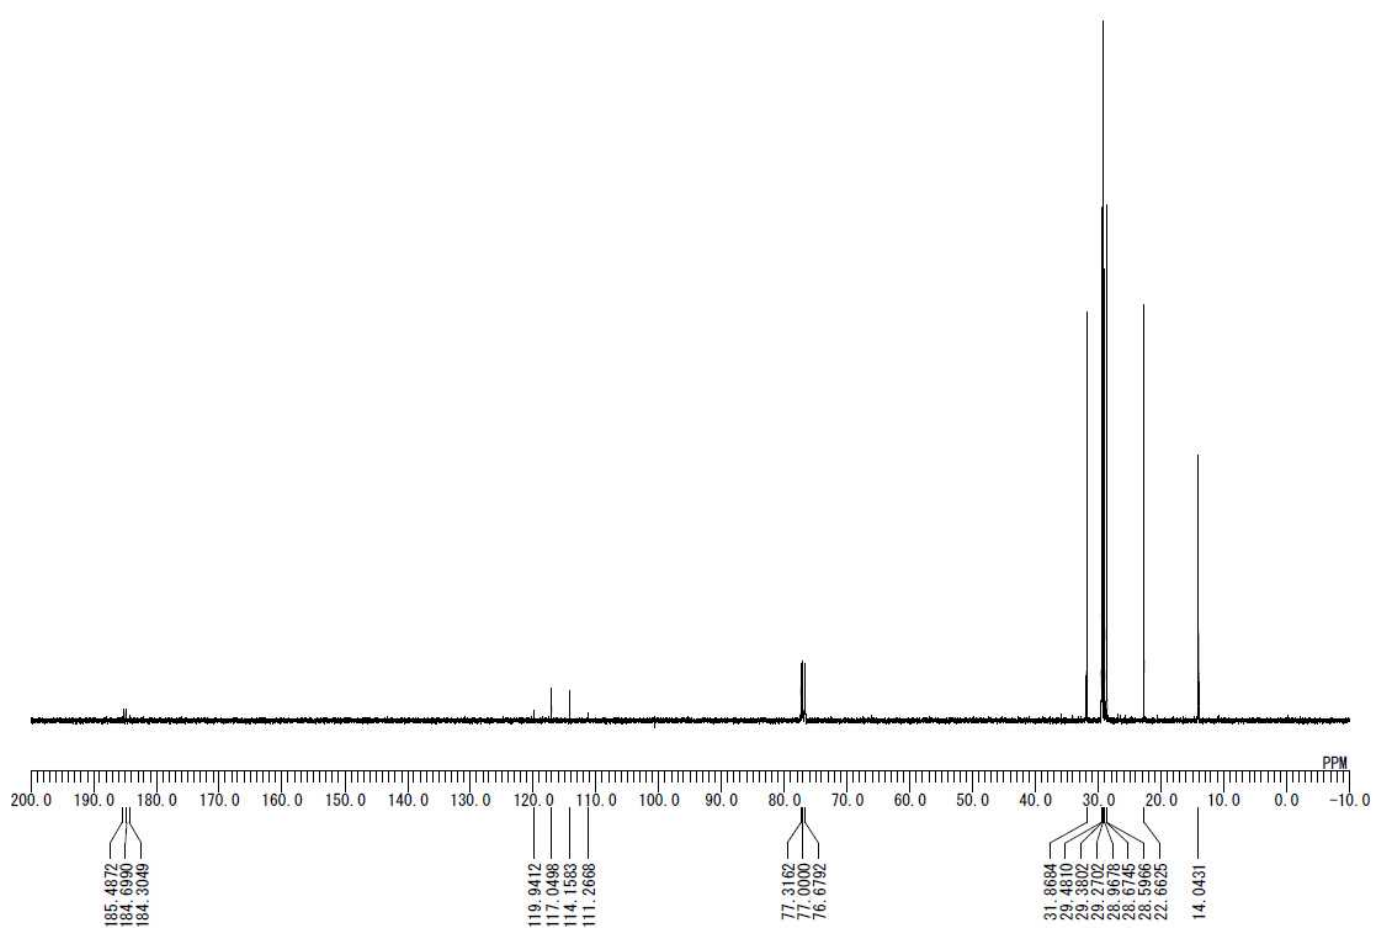





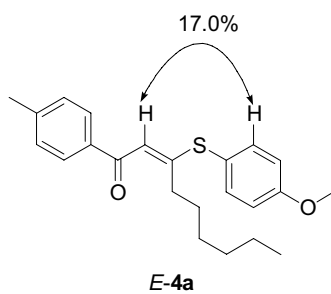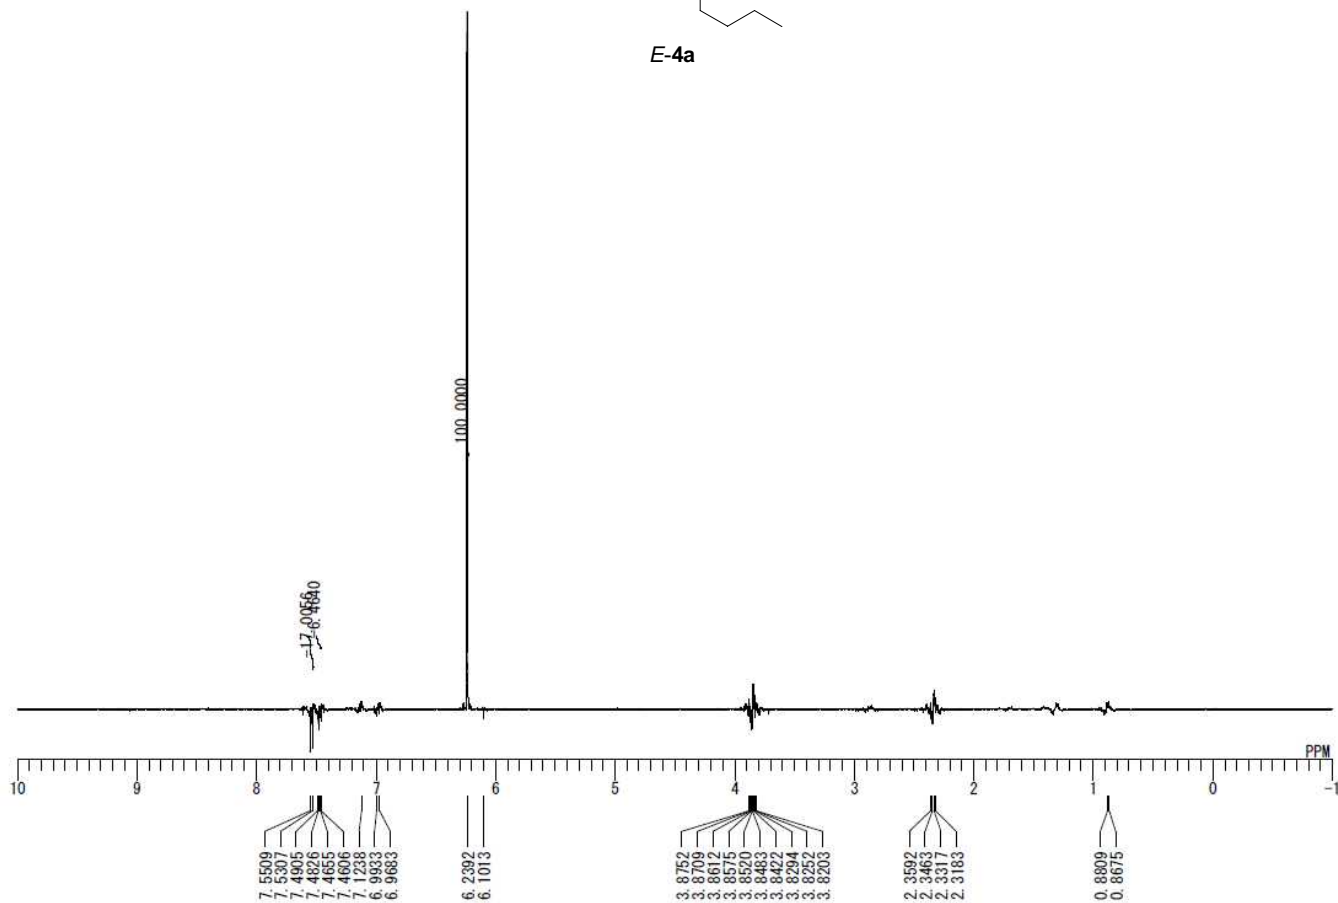

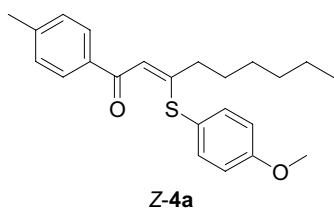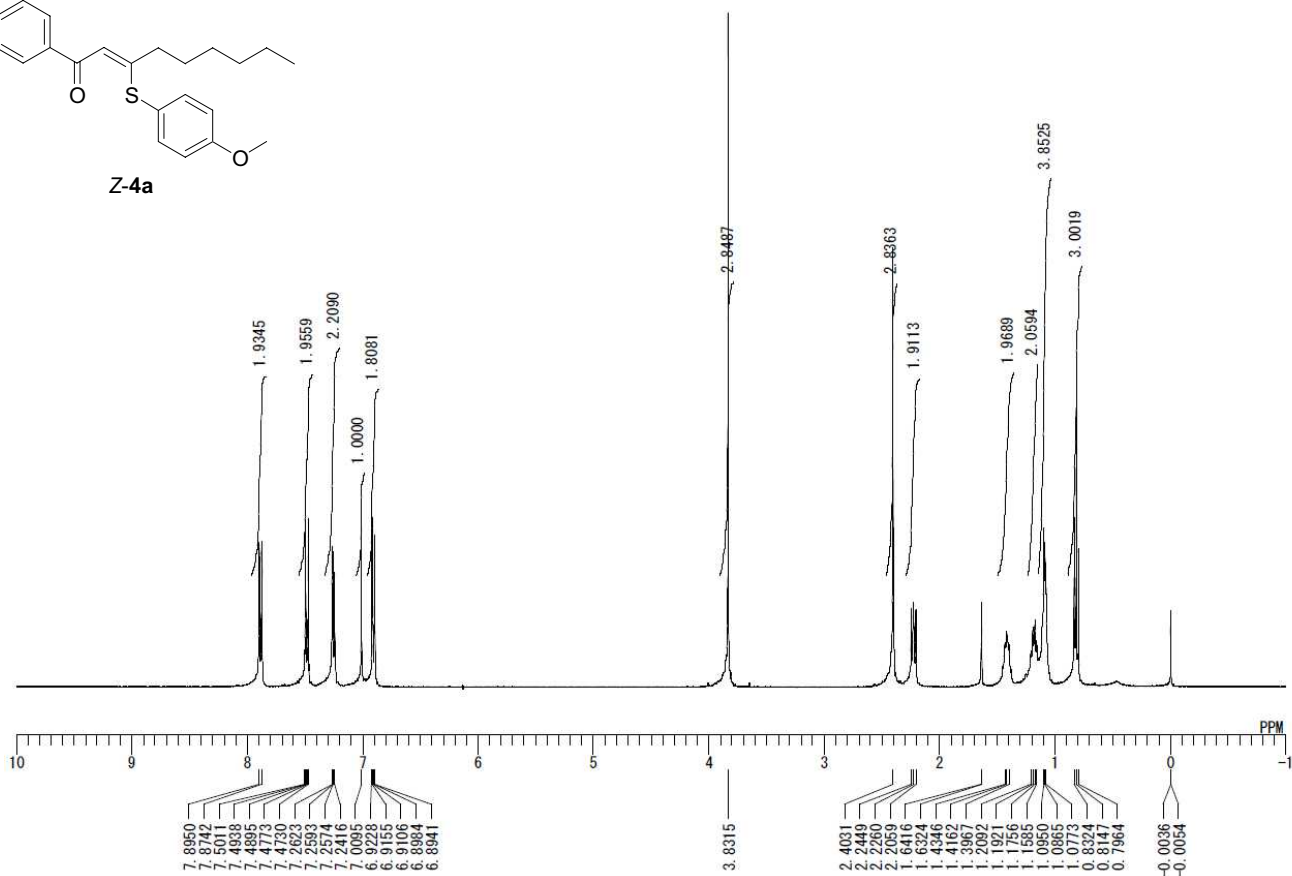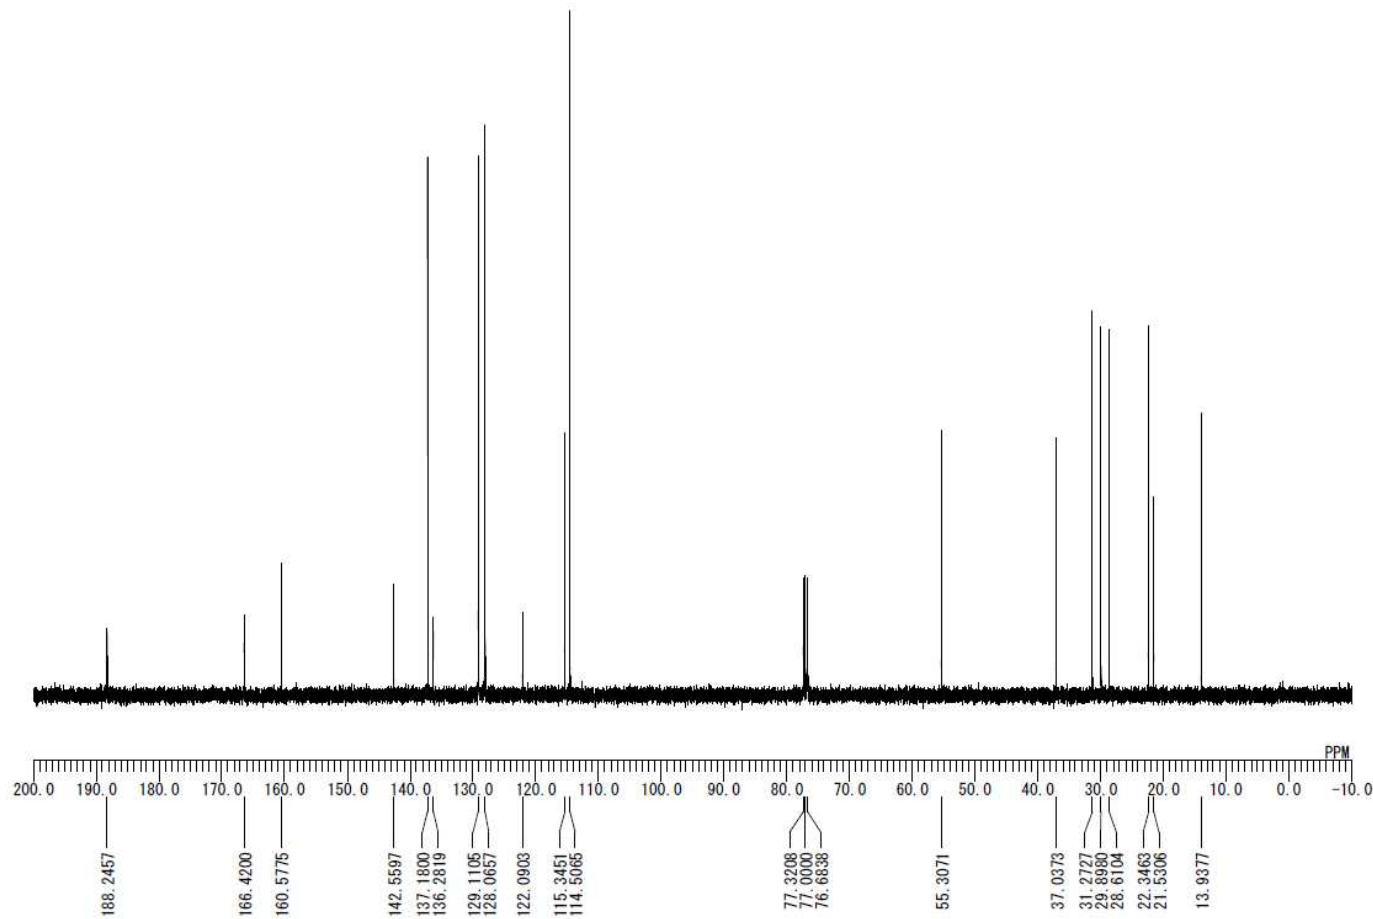

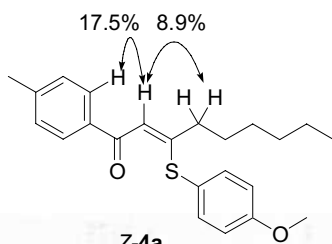

Z-4a

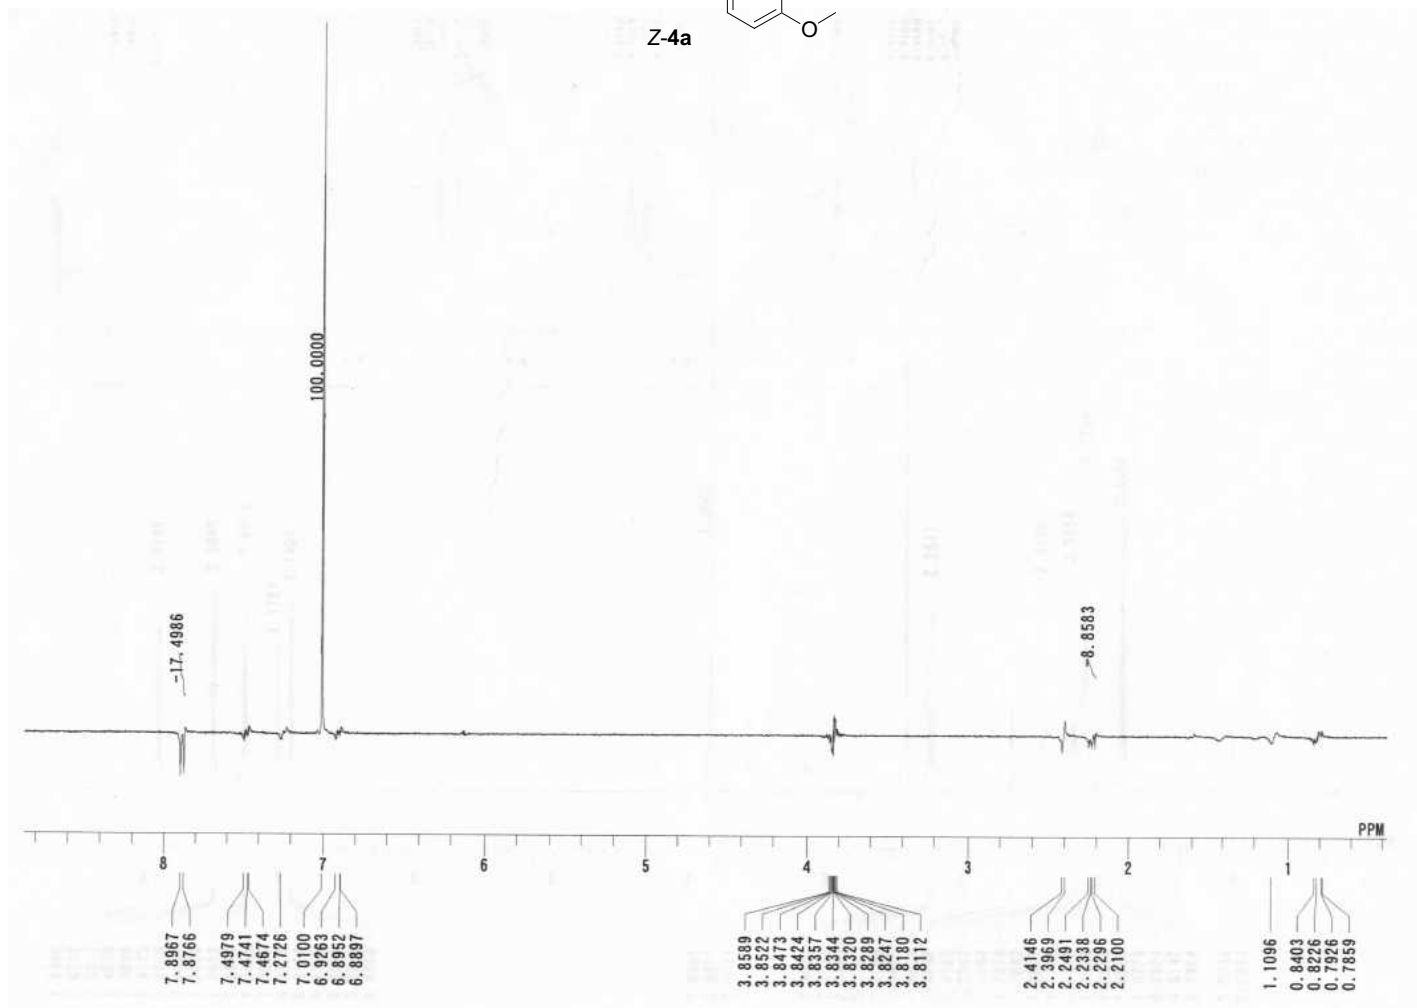

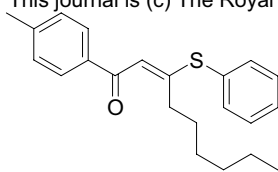

**E-4b**

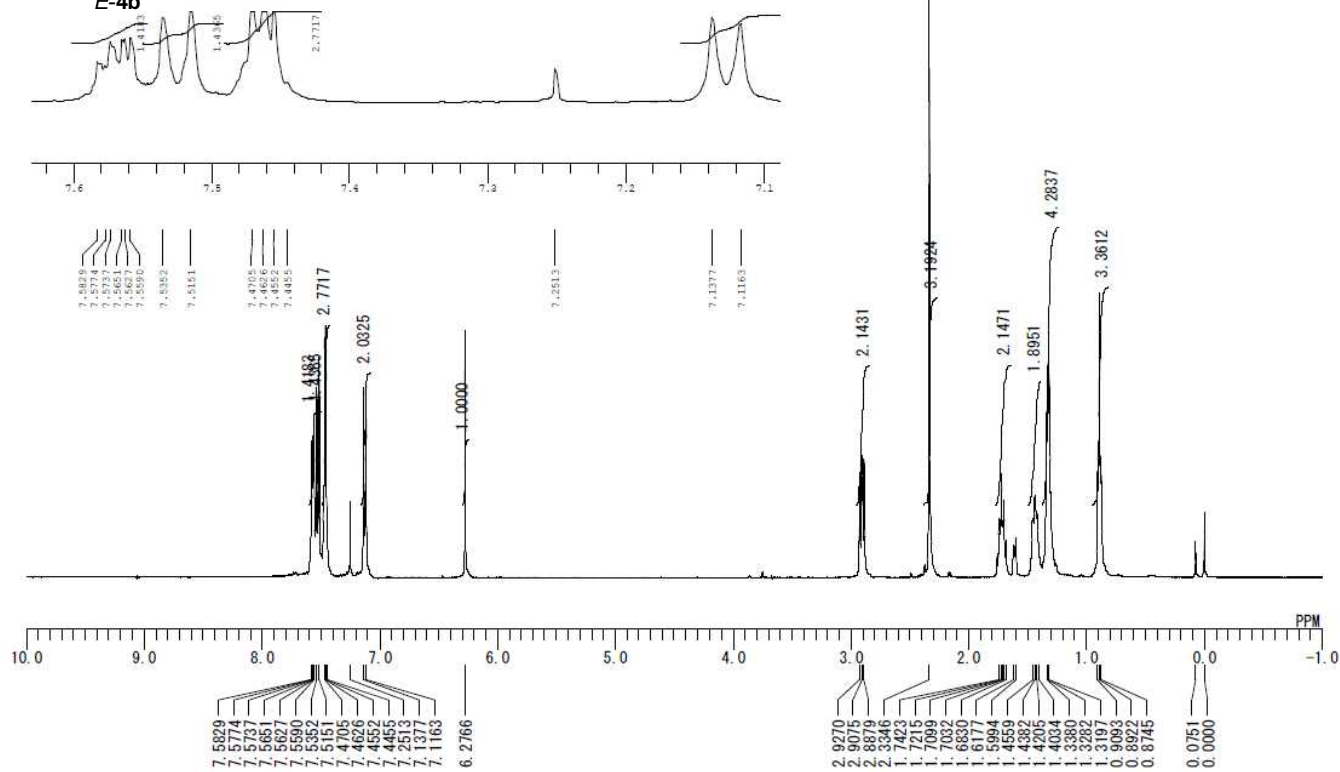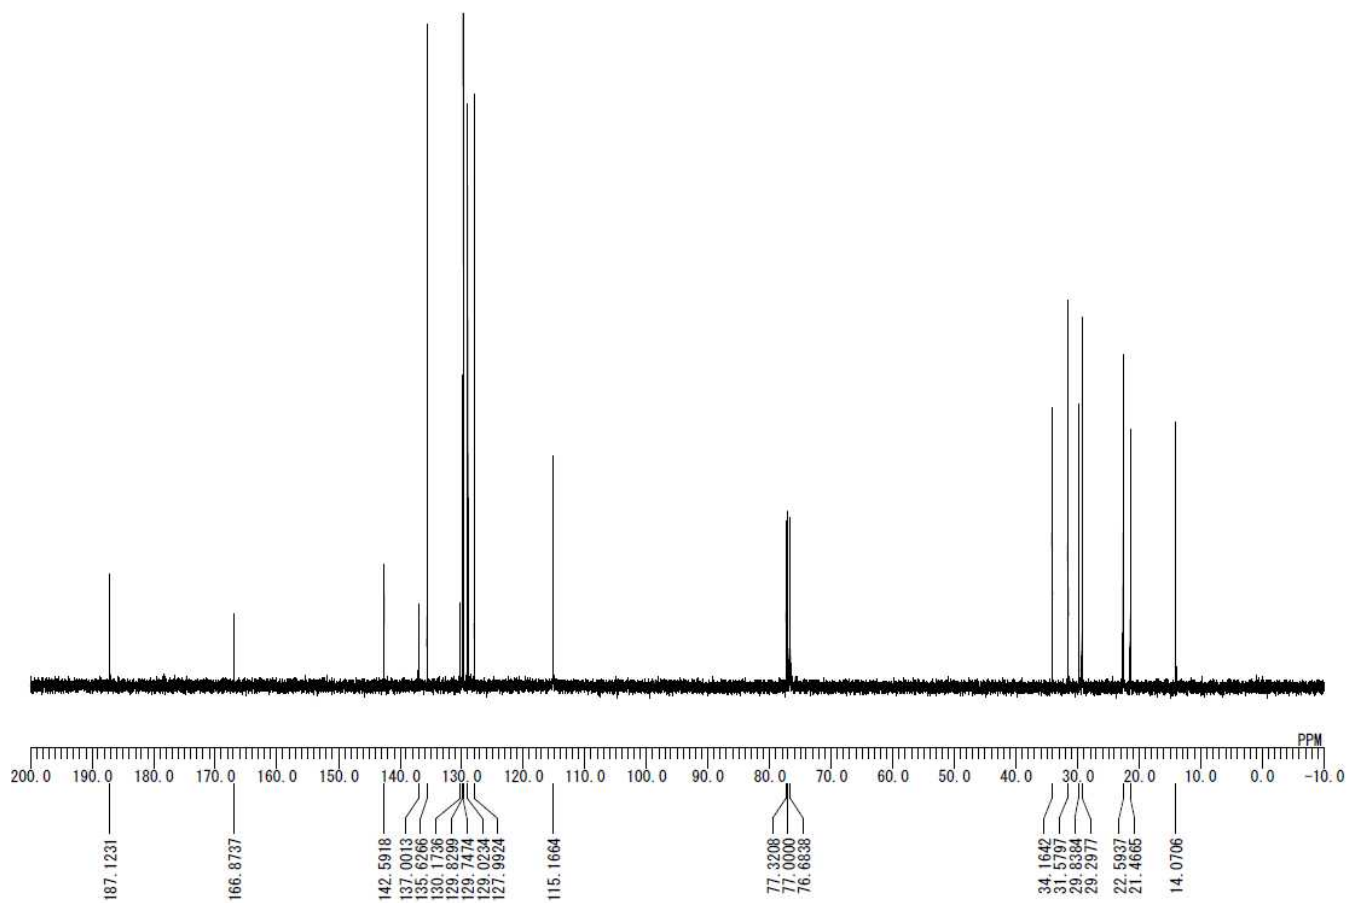

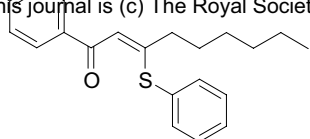

Z-4b

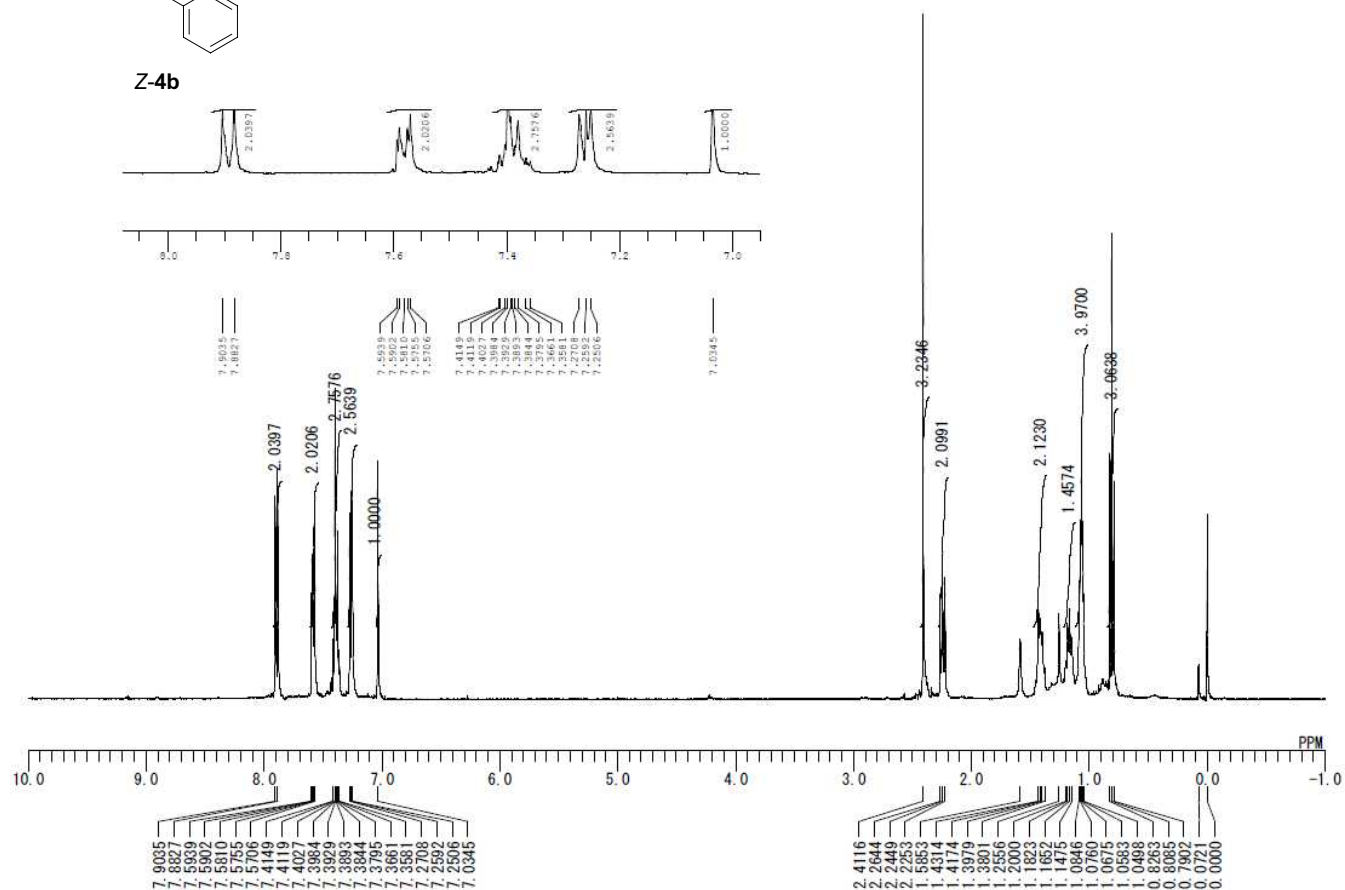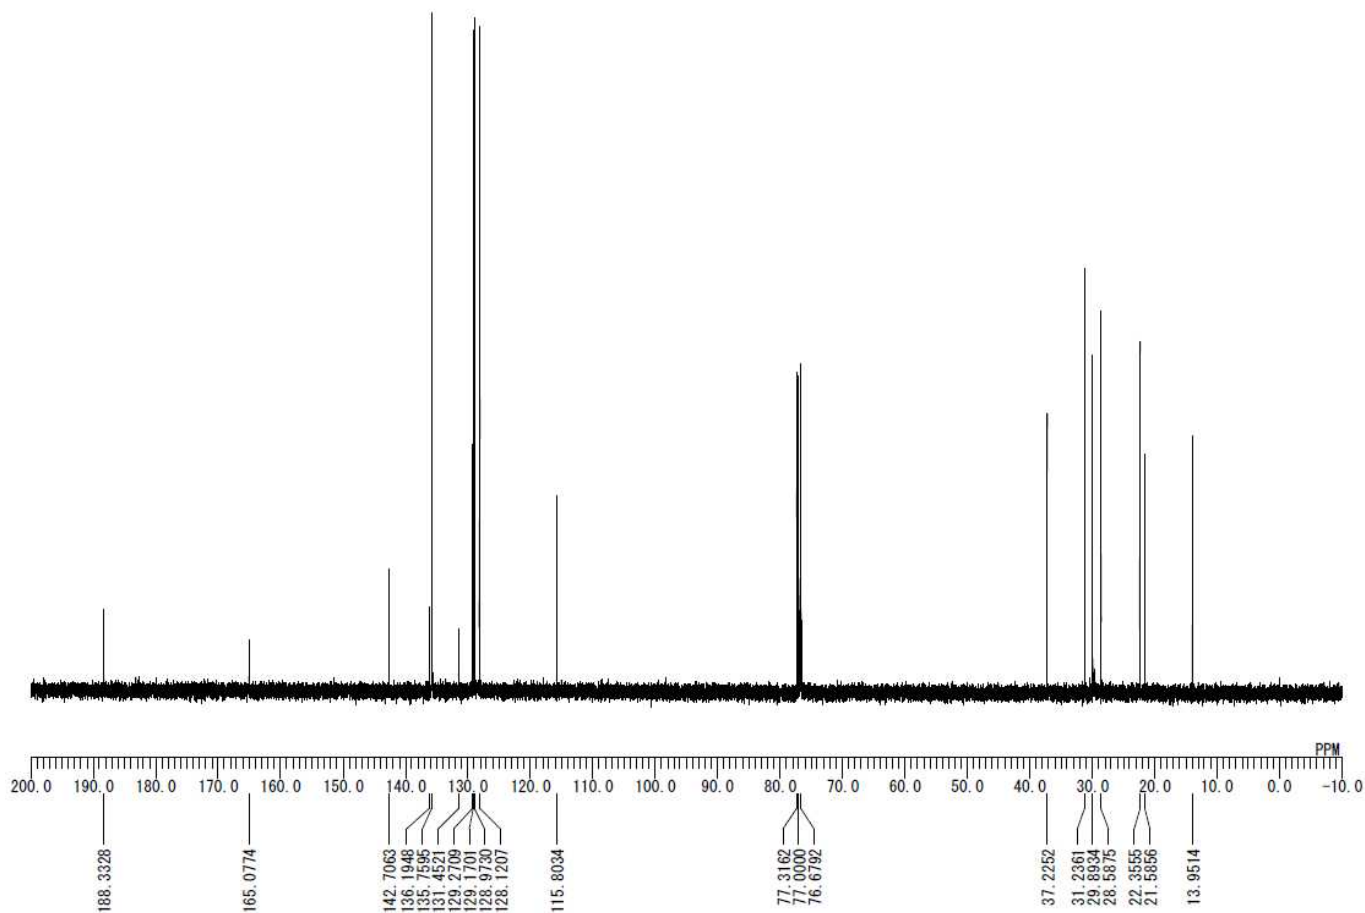

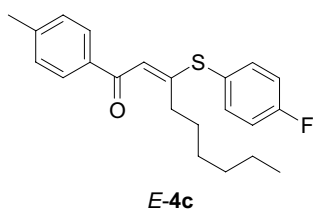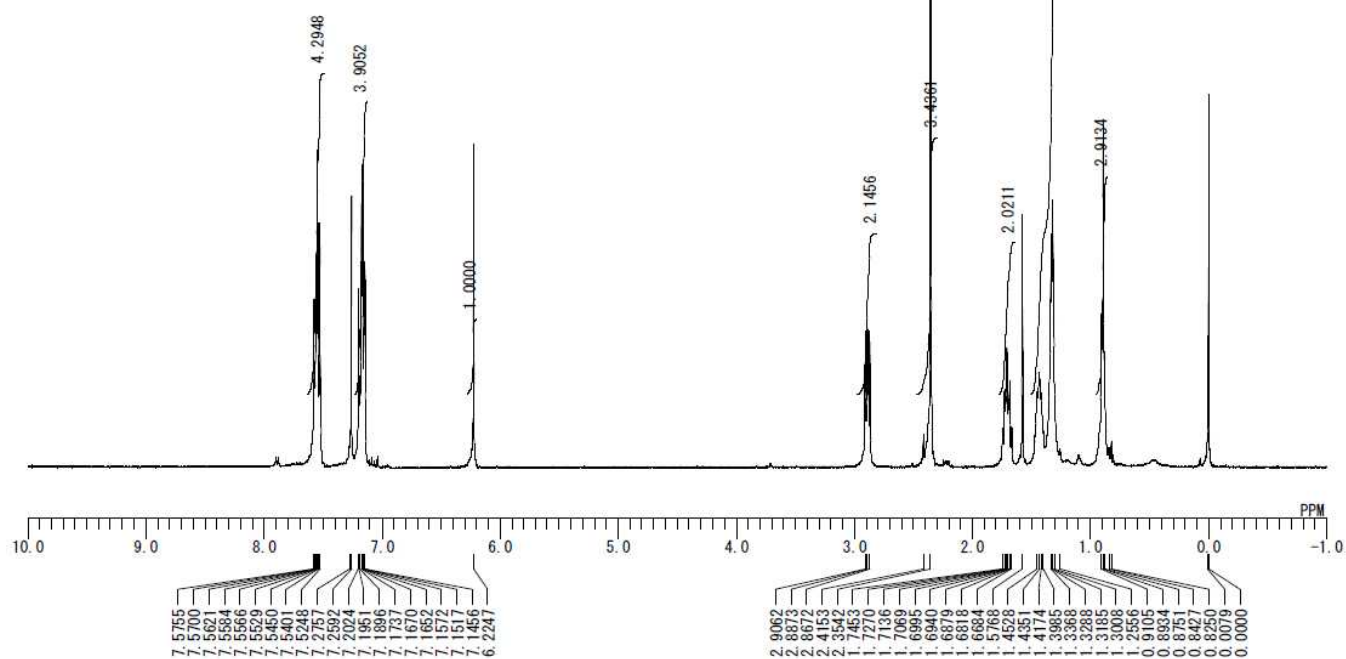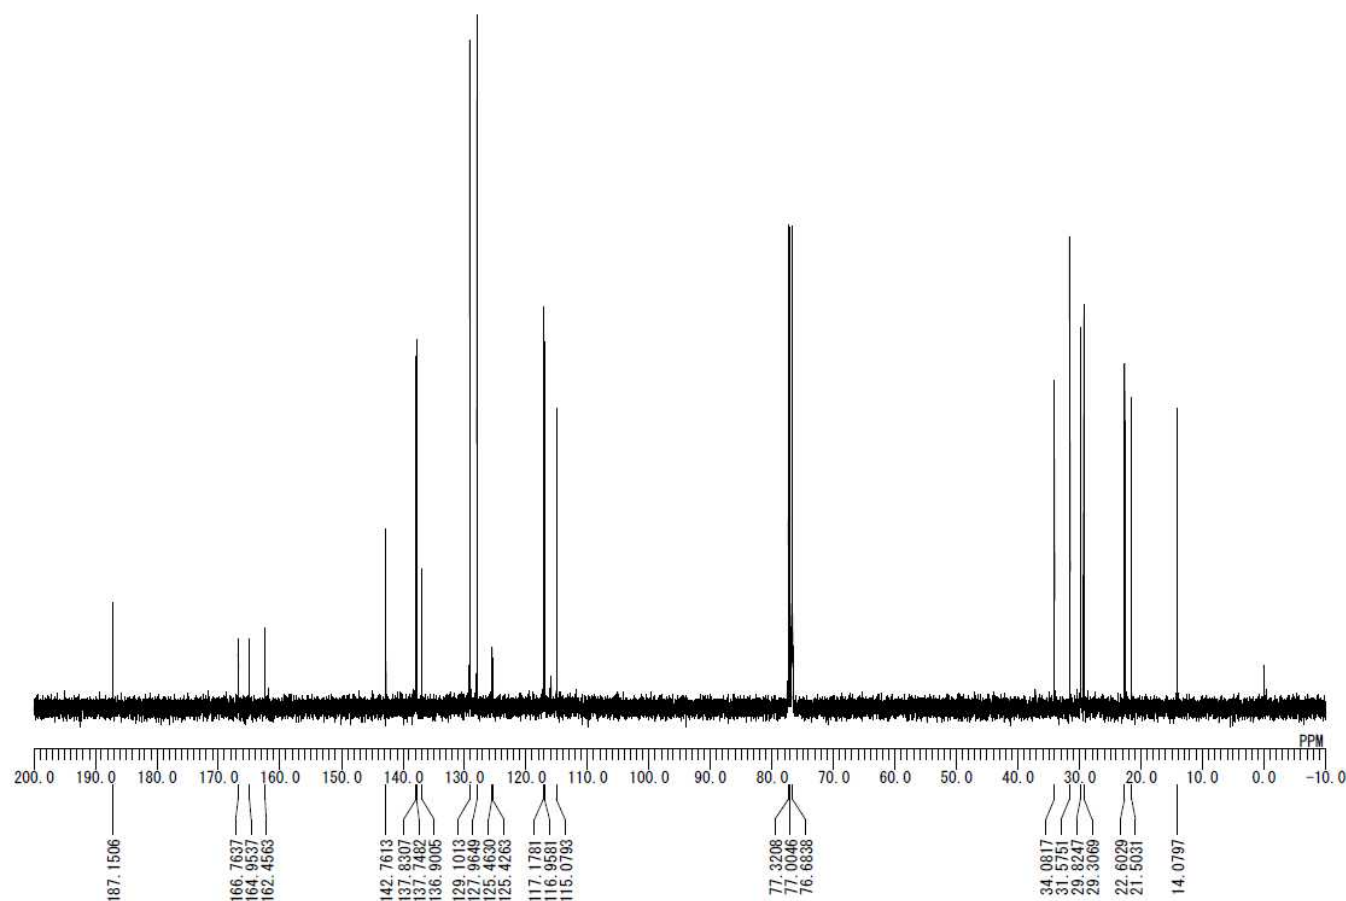

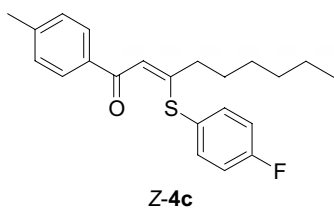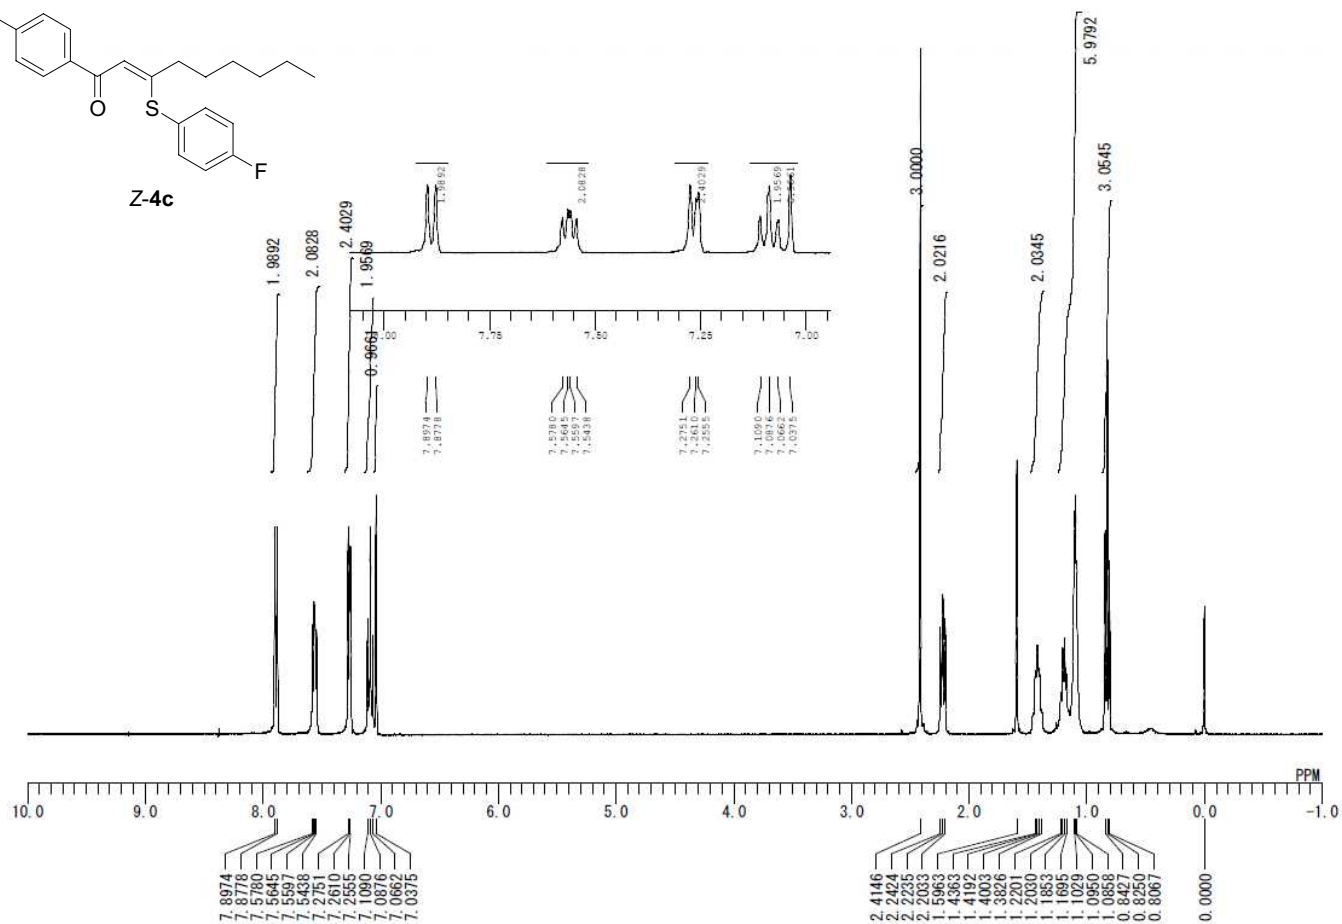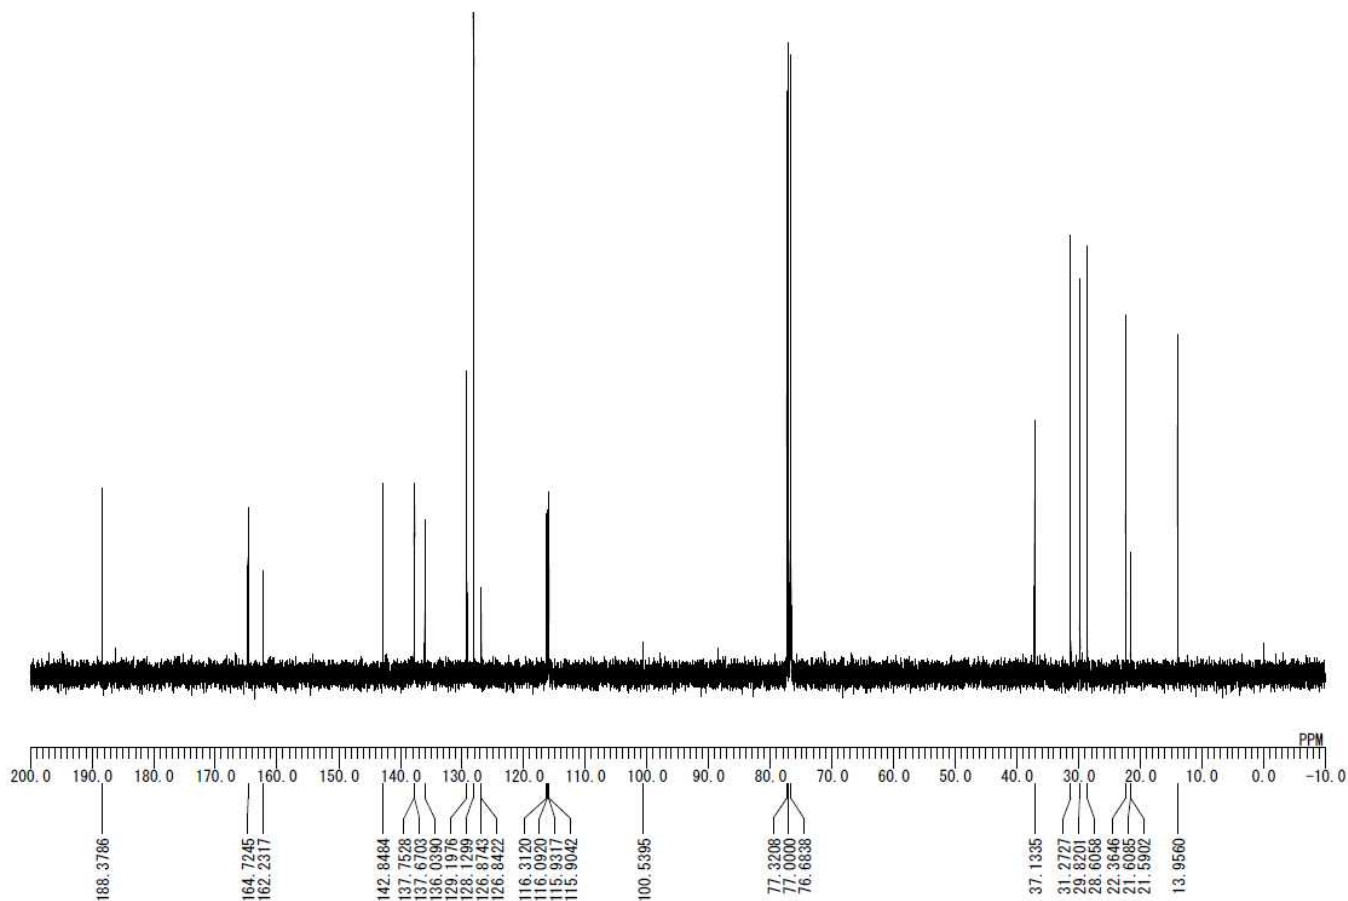

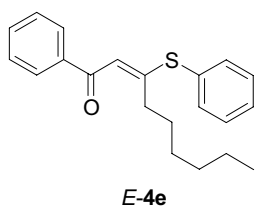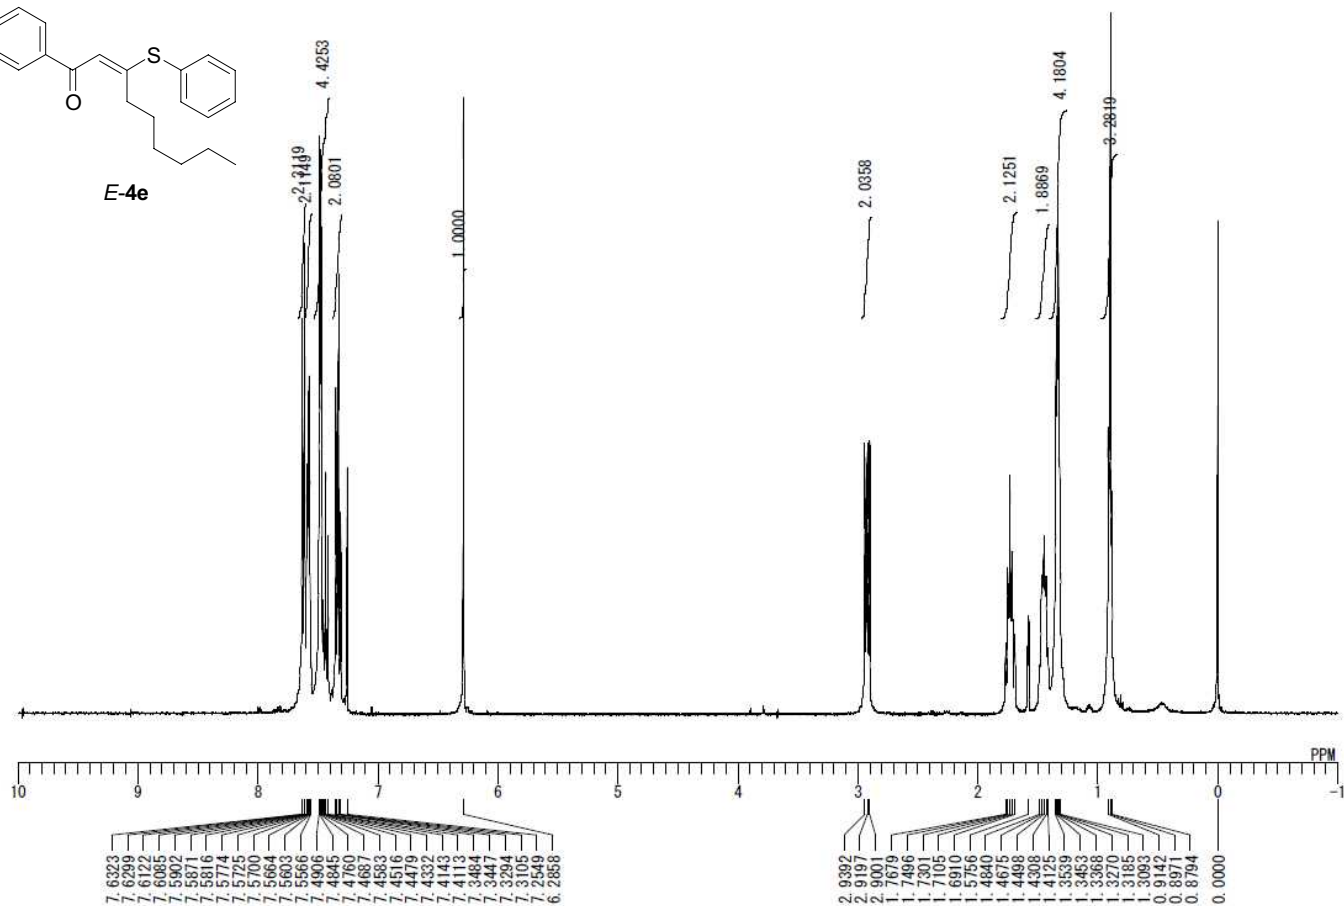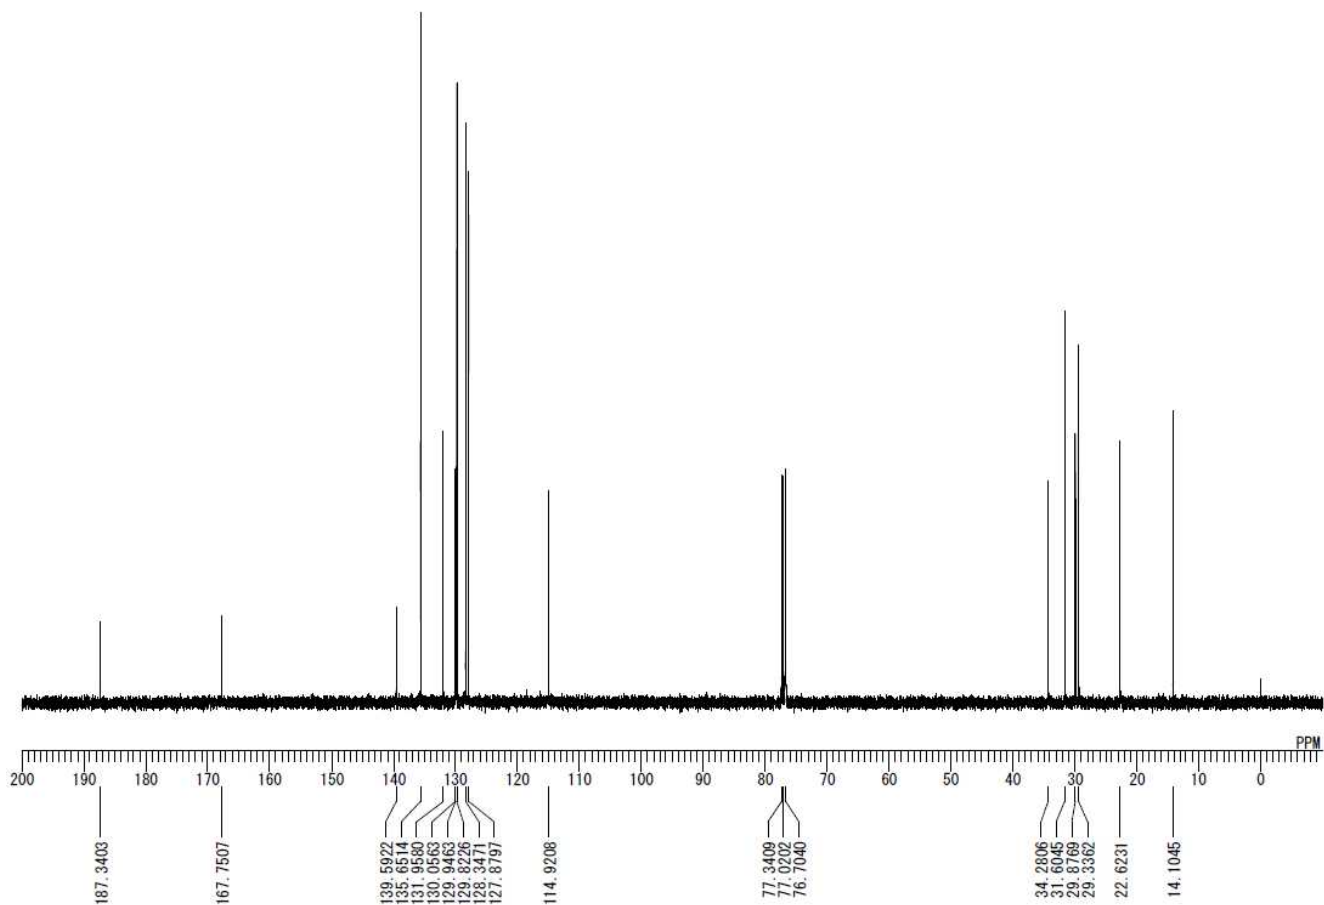



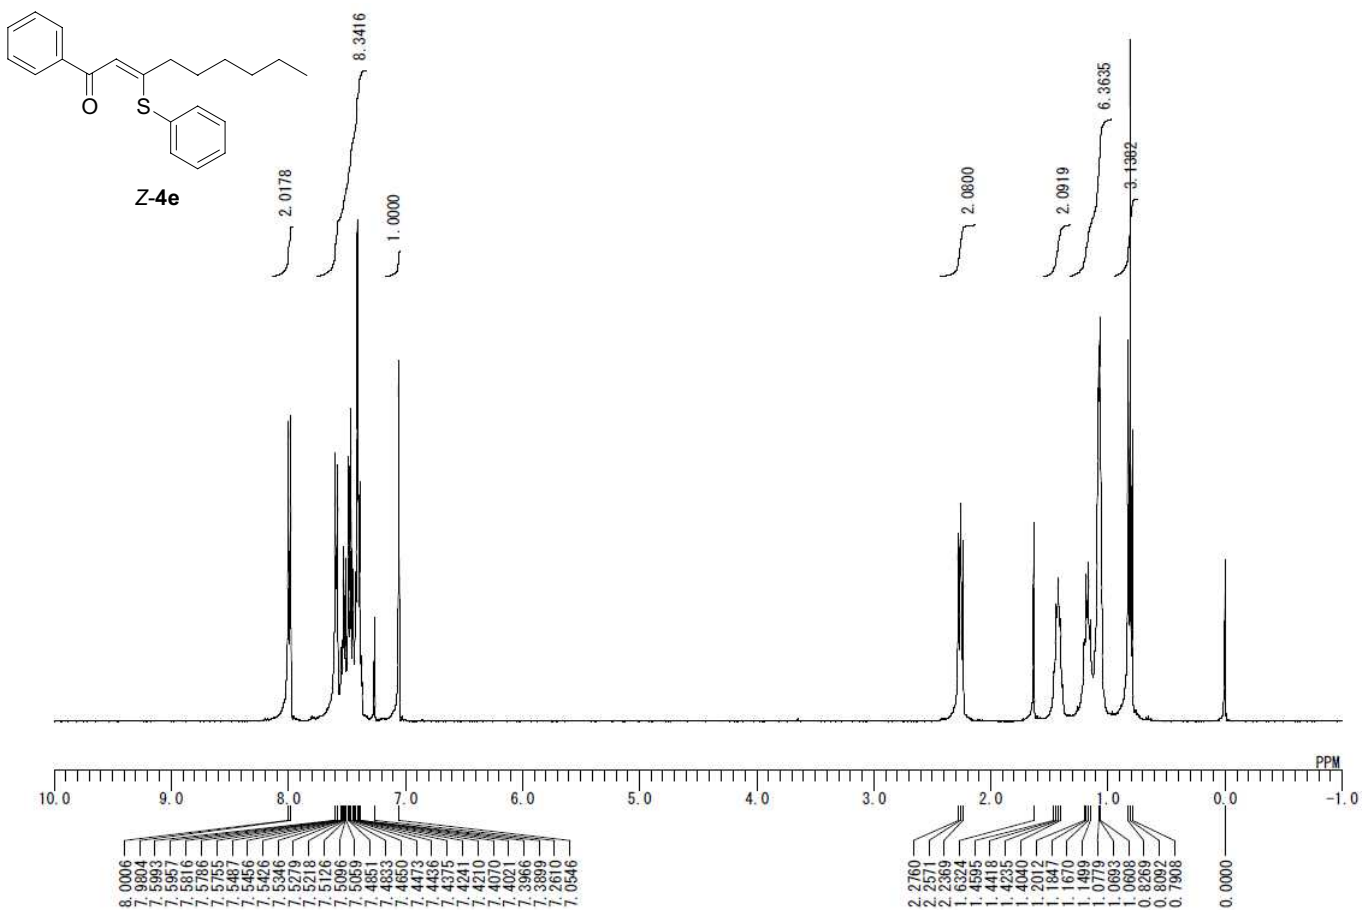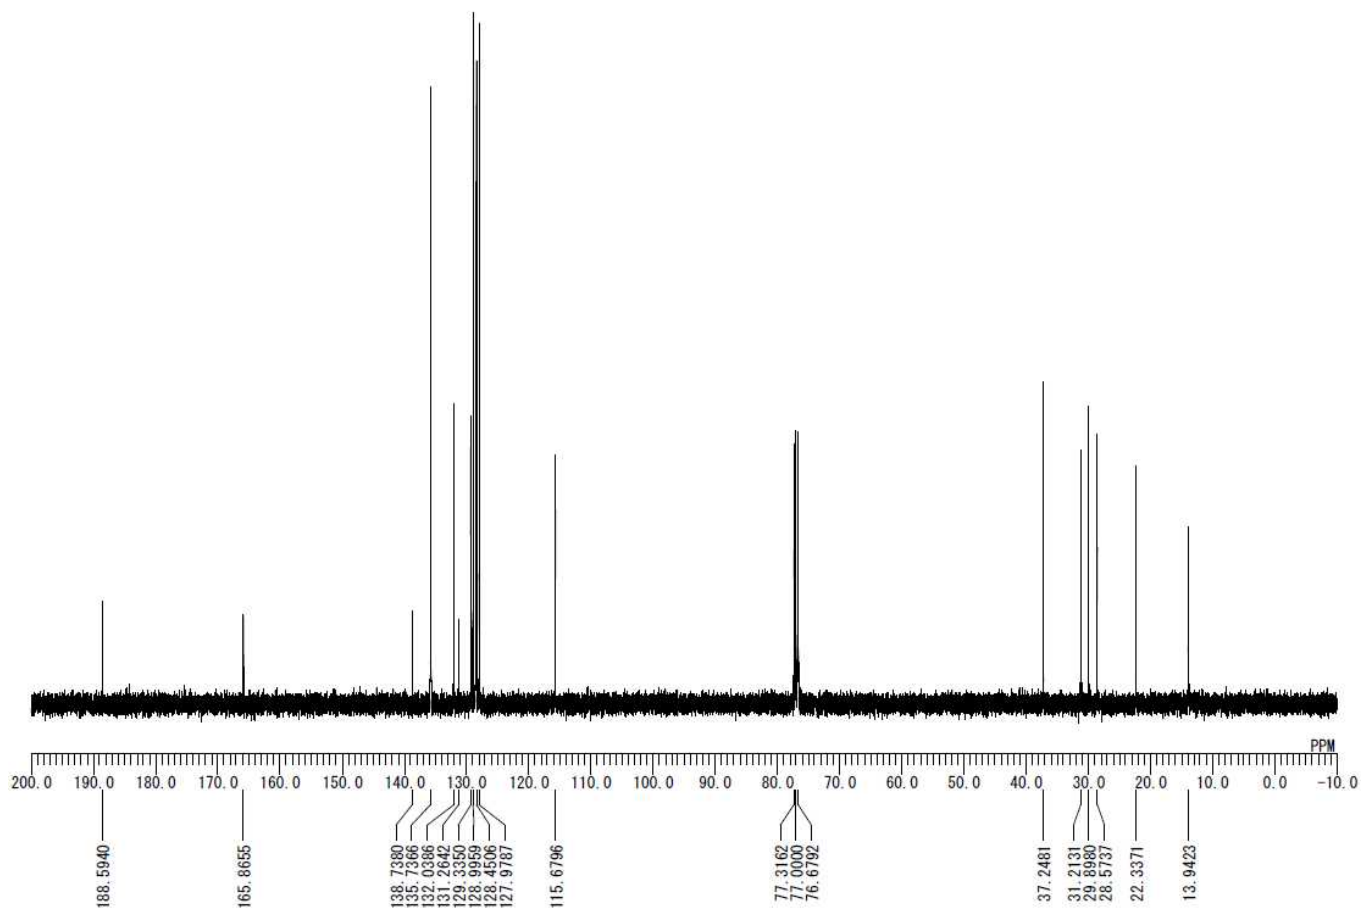

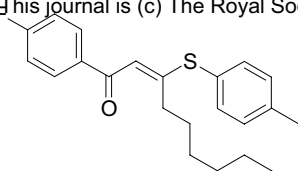

E-4f

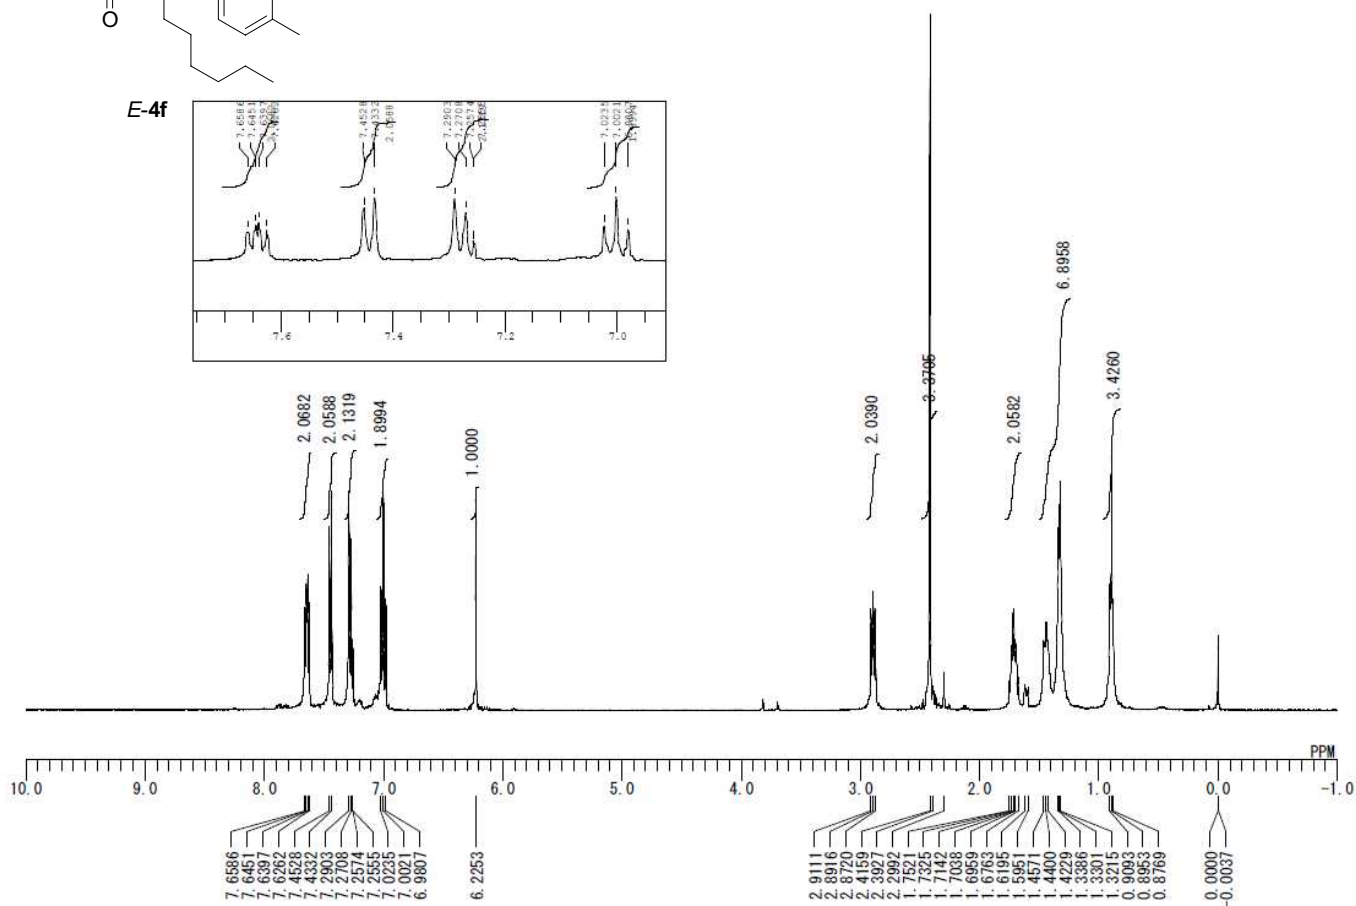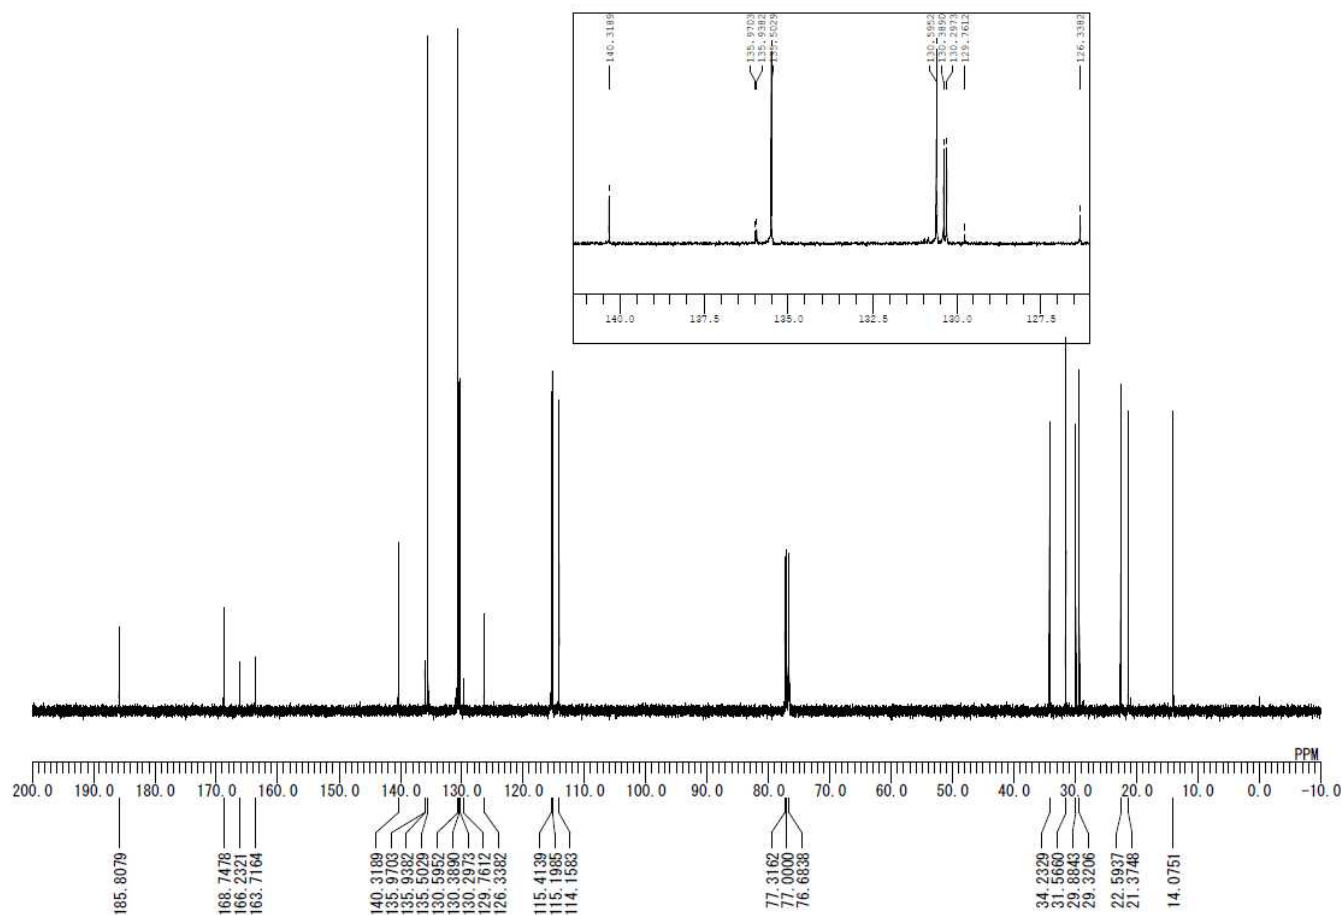

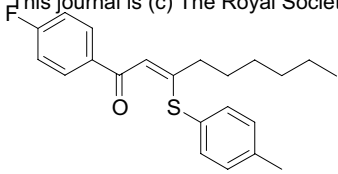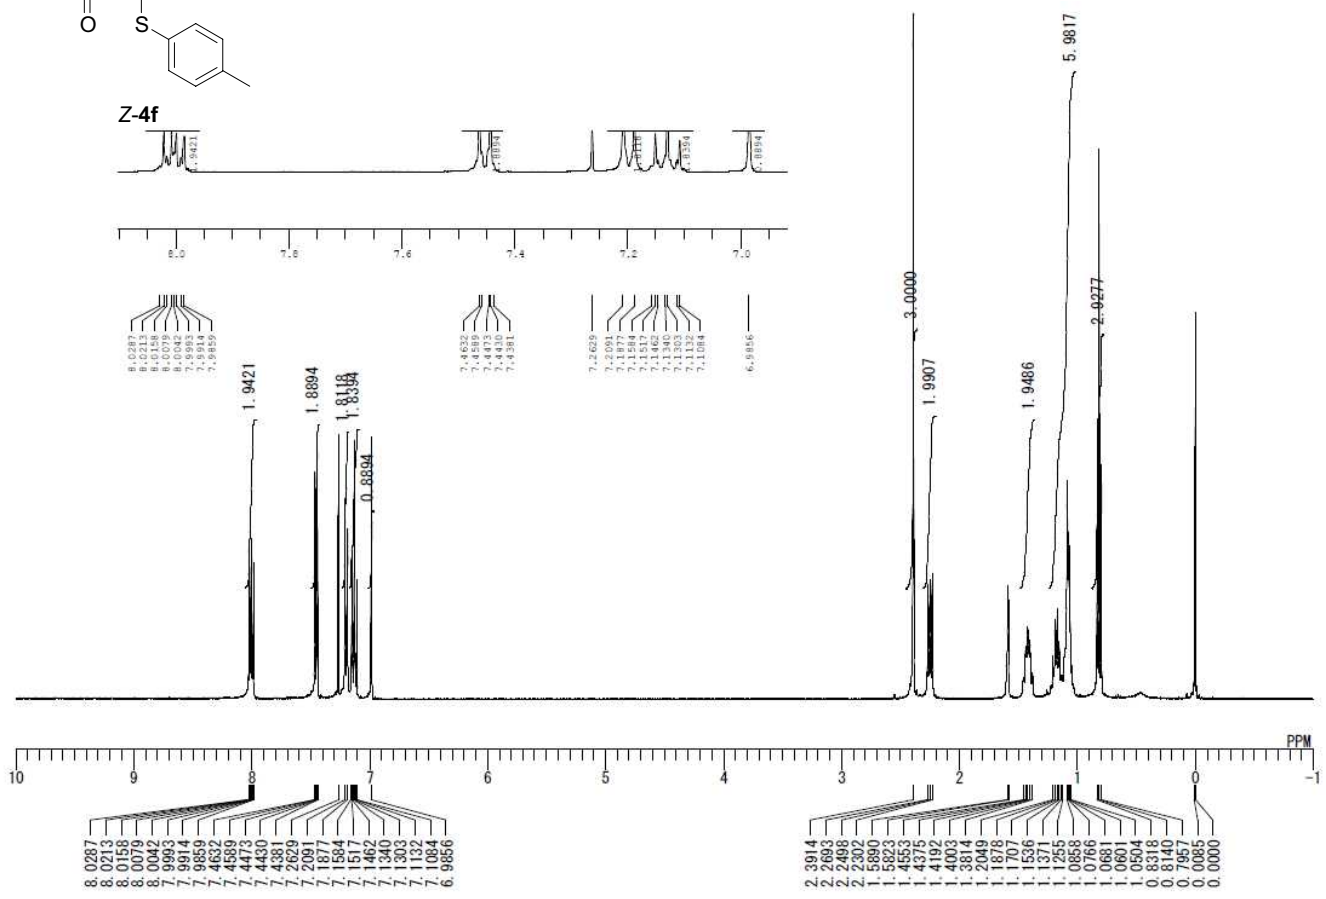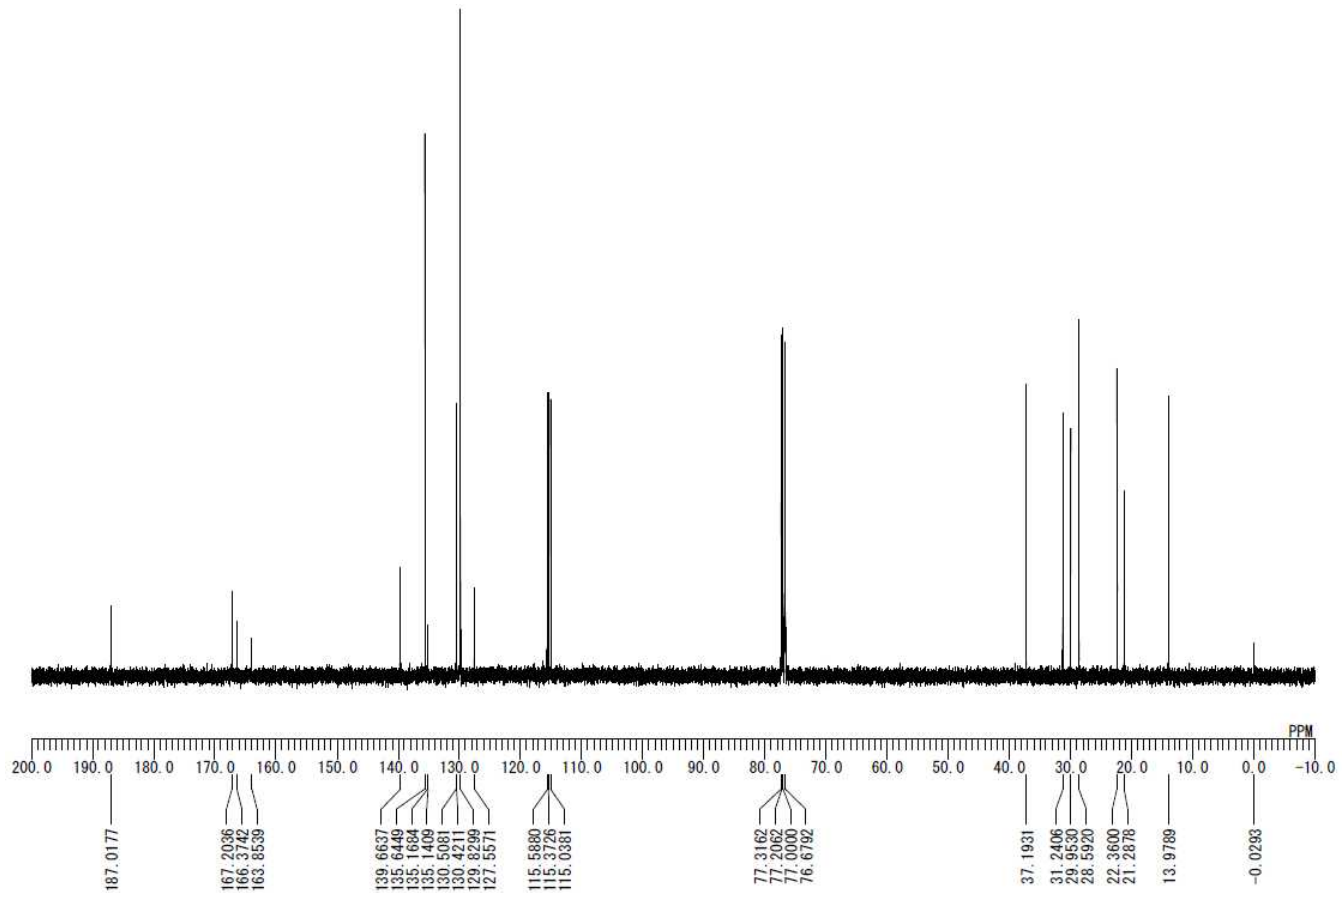

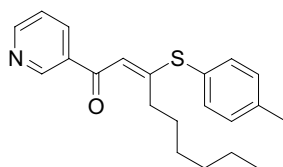

**E-4g**

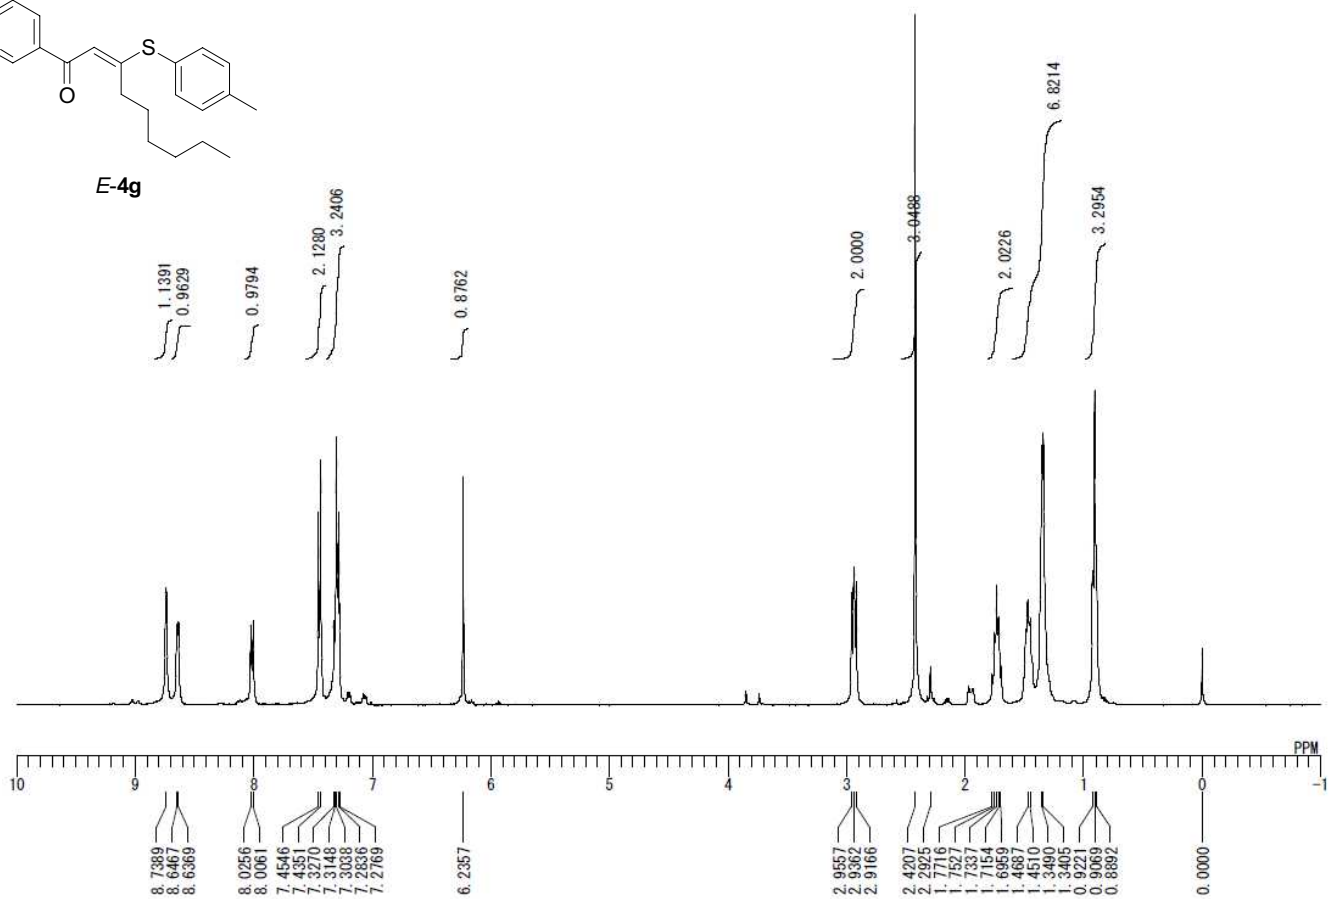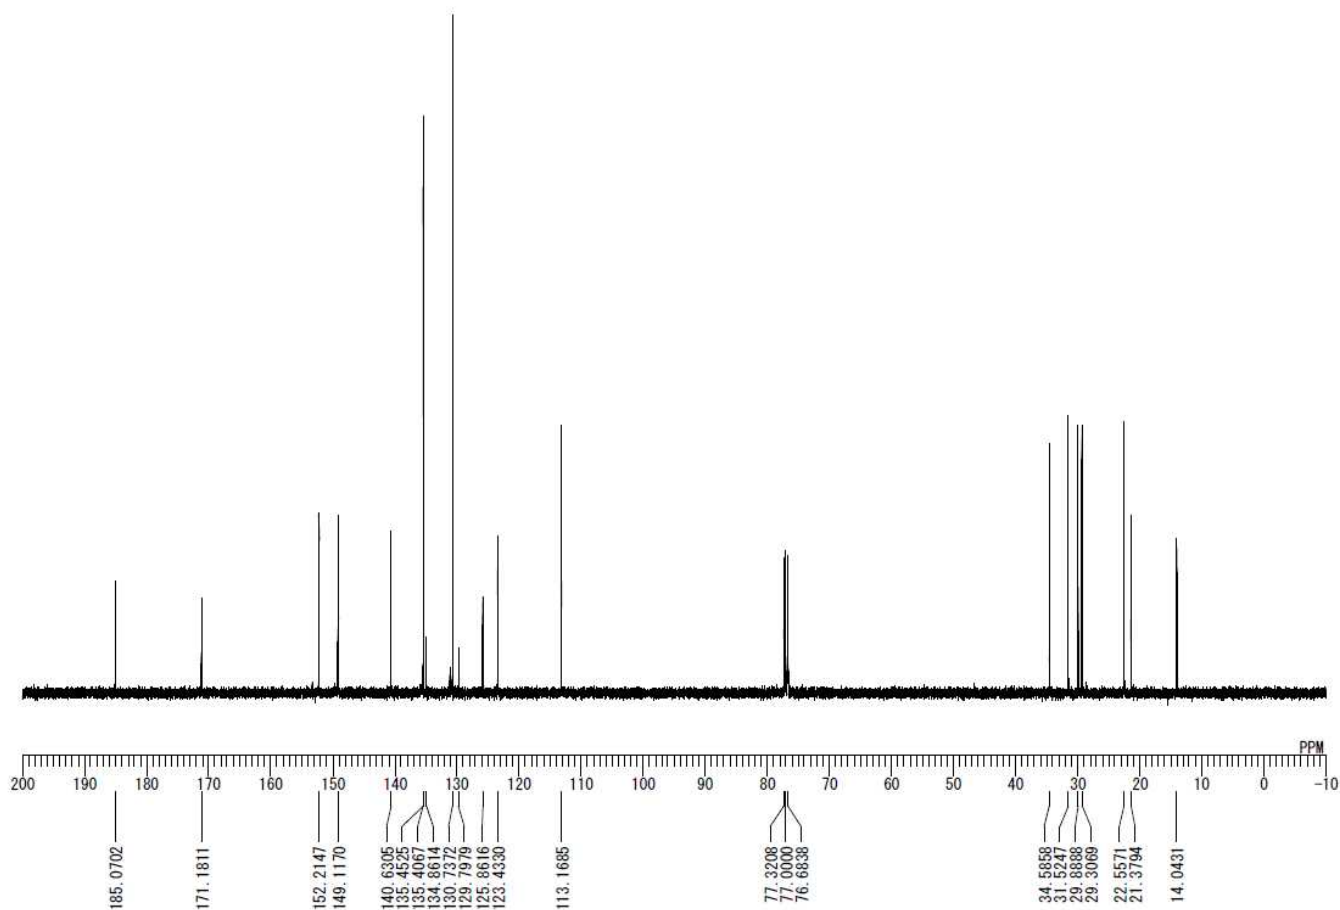

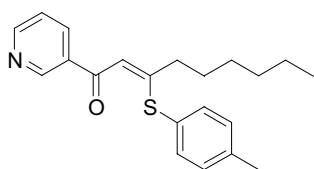

**Z-4g**

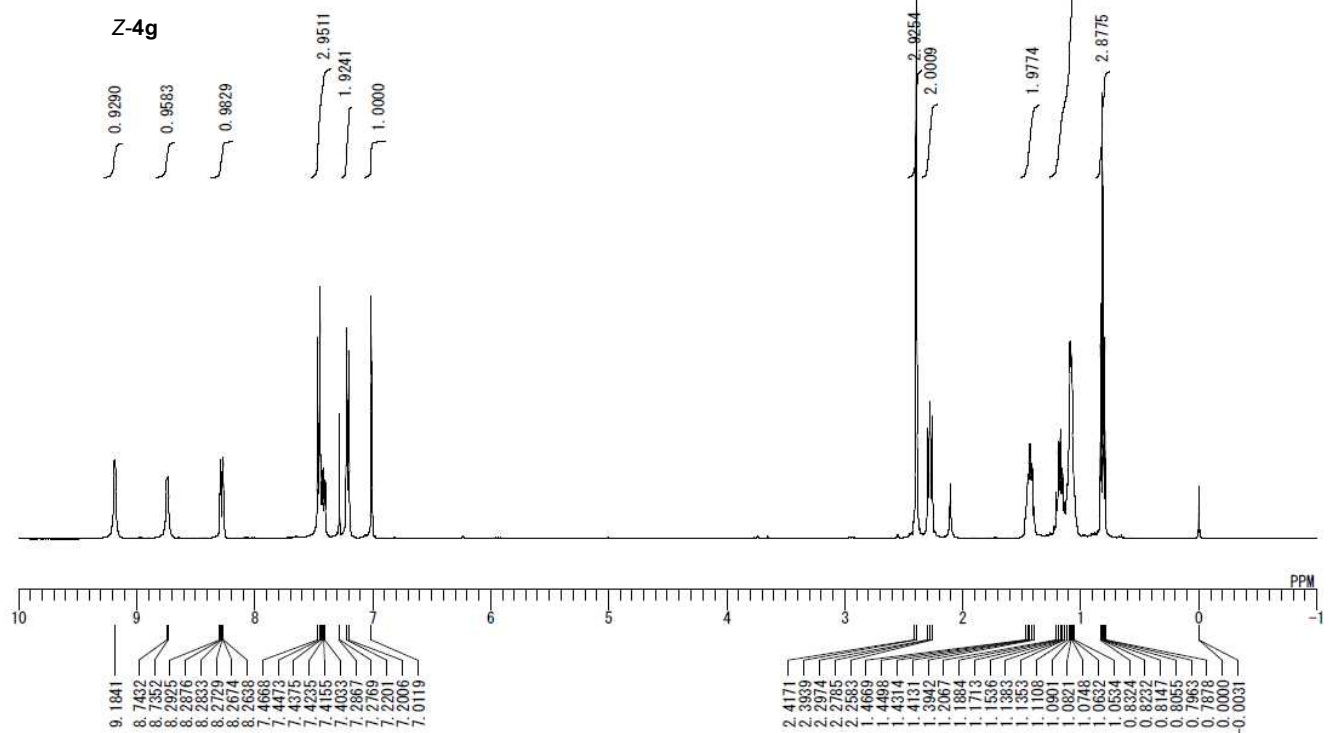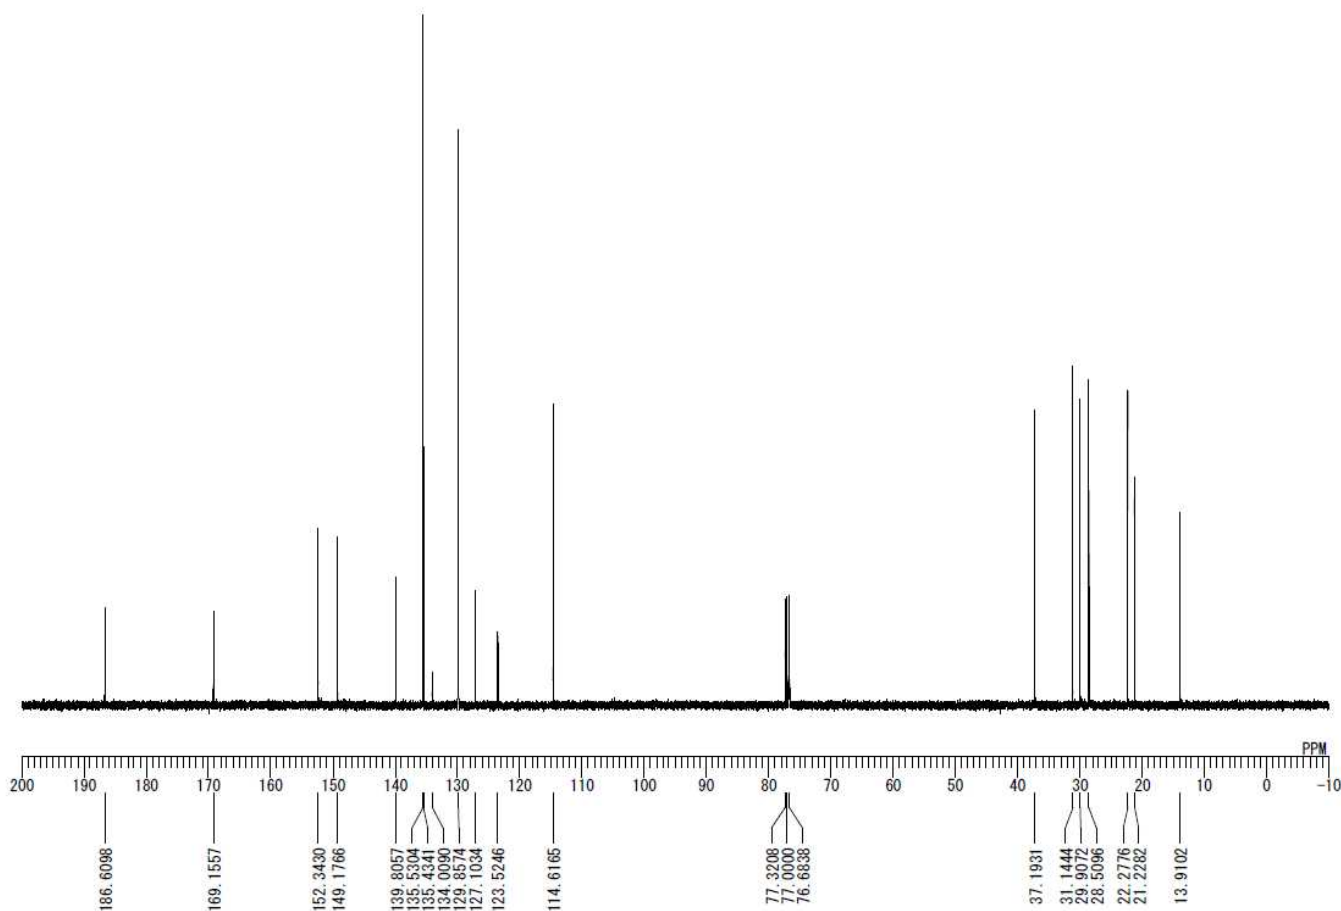

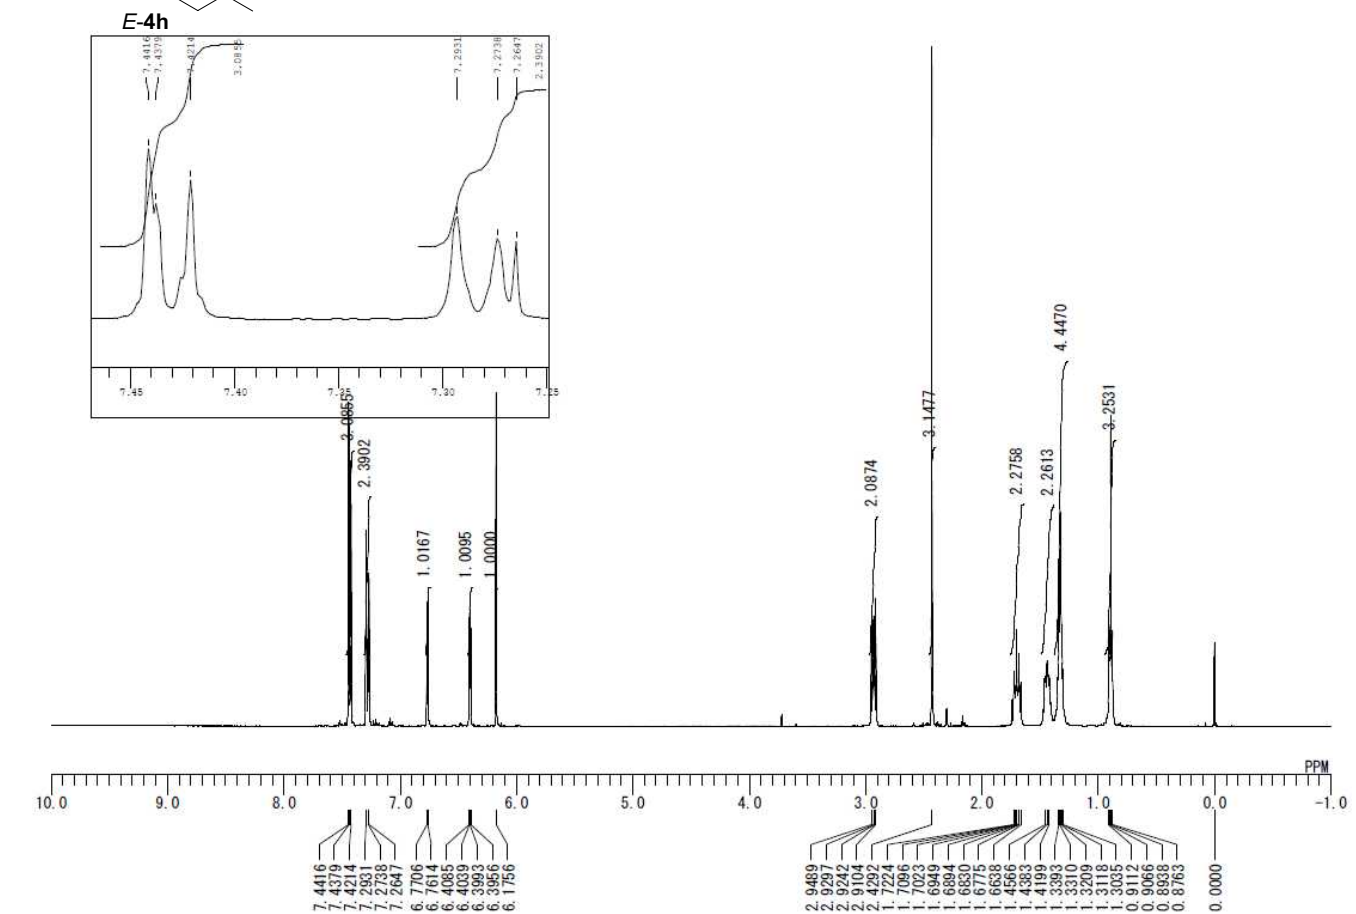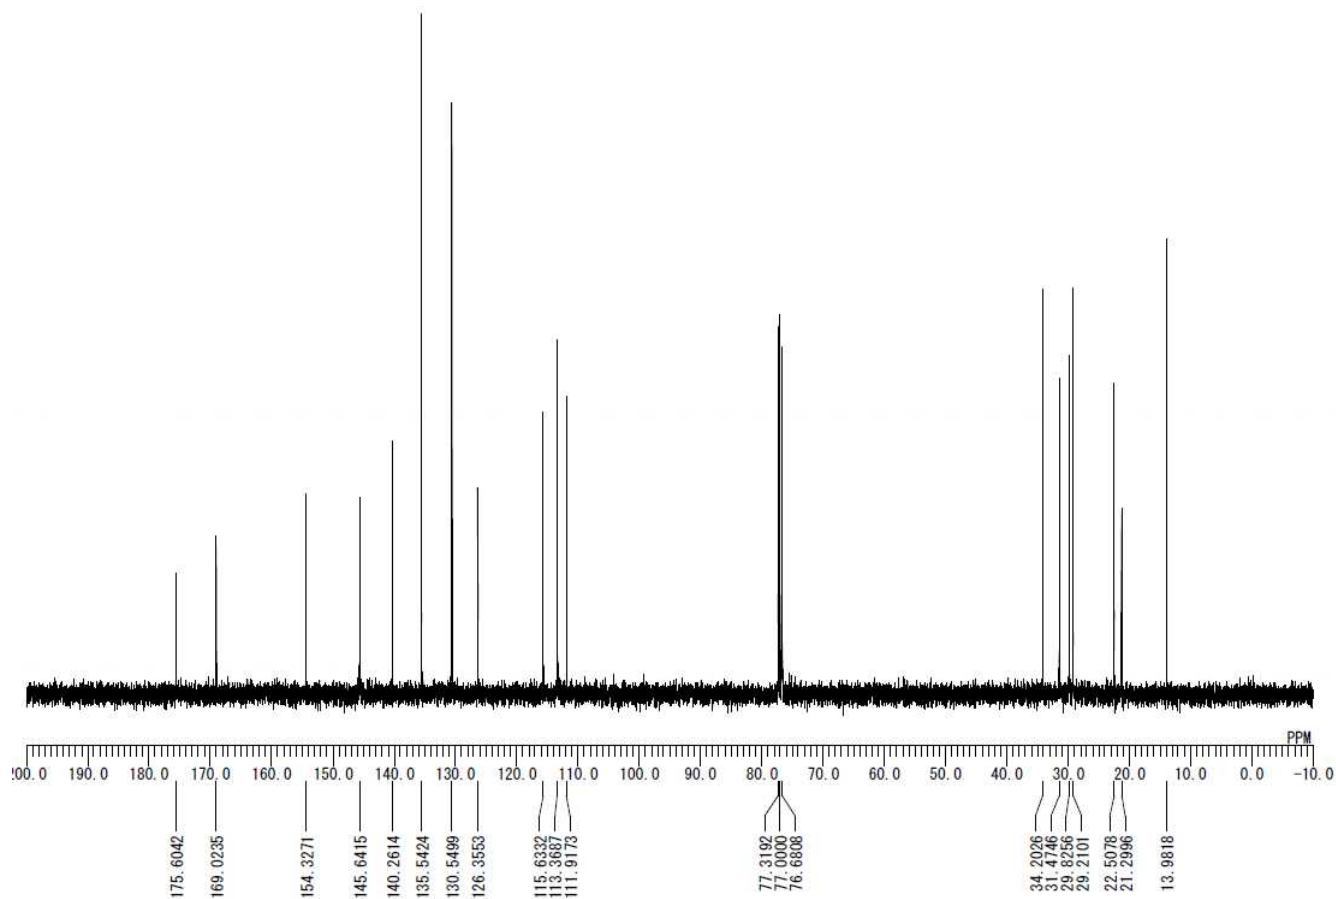

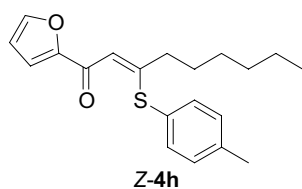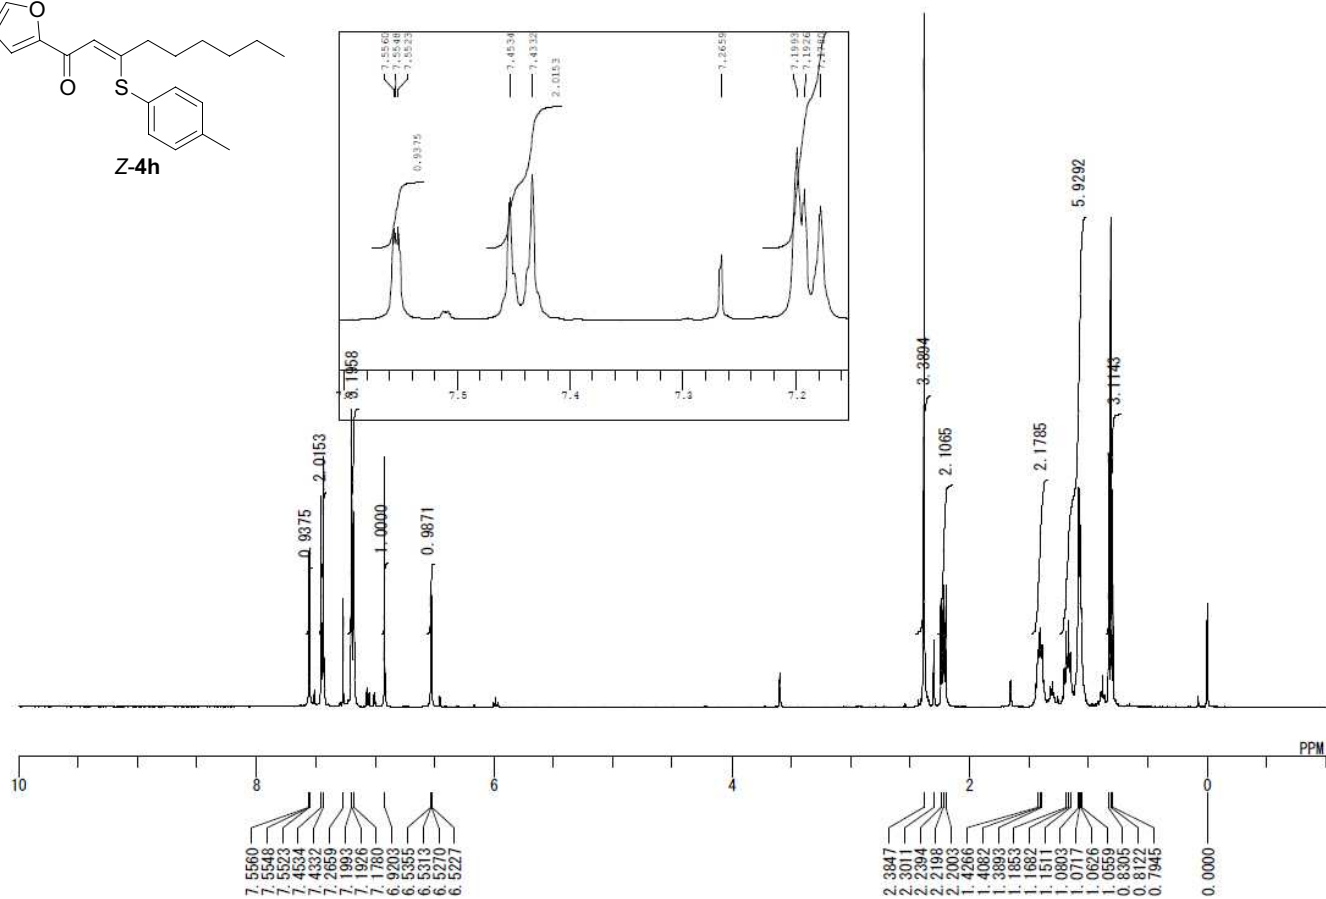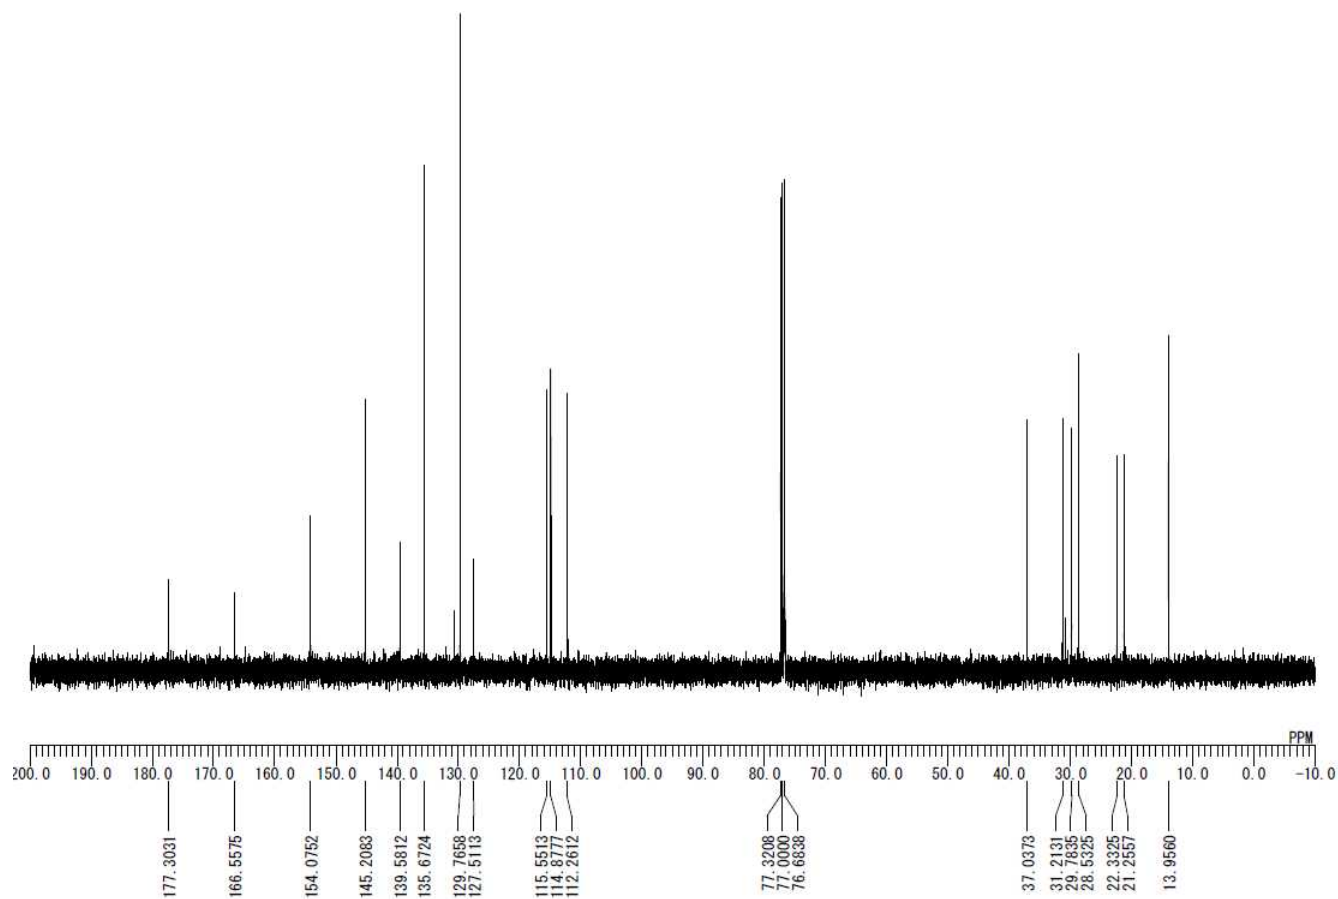



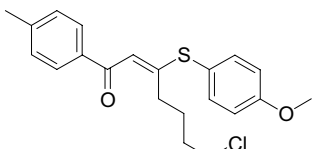

E-4k

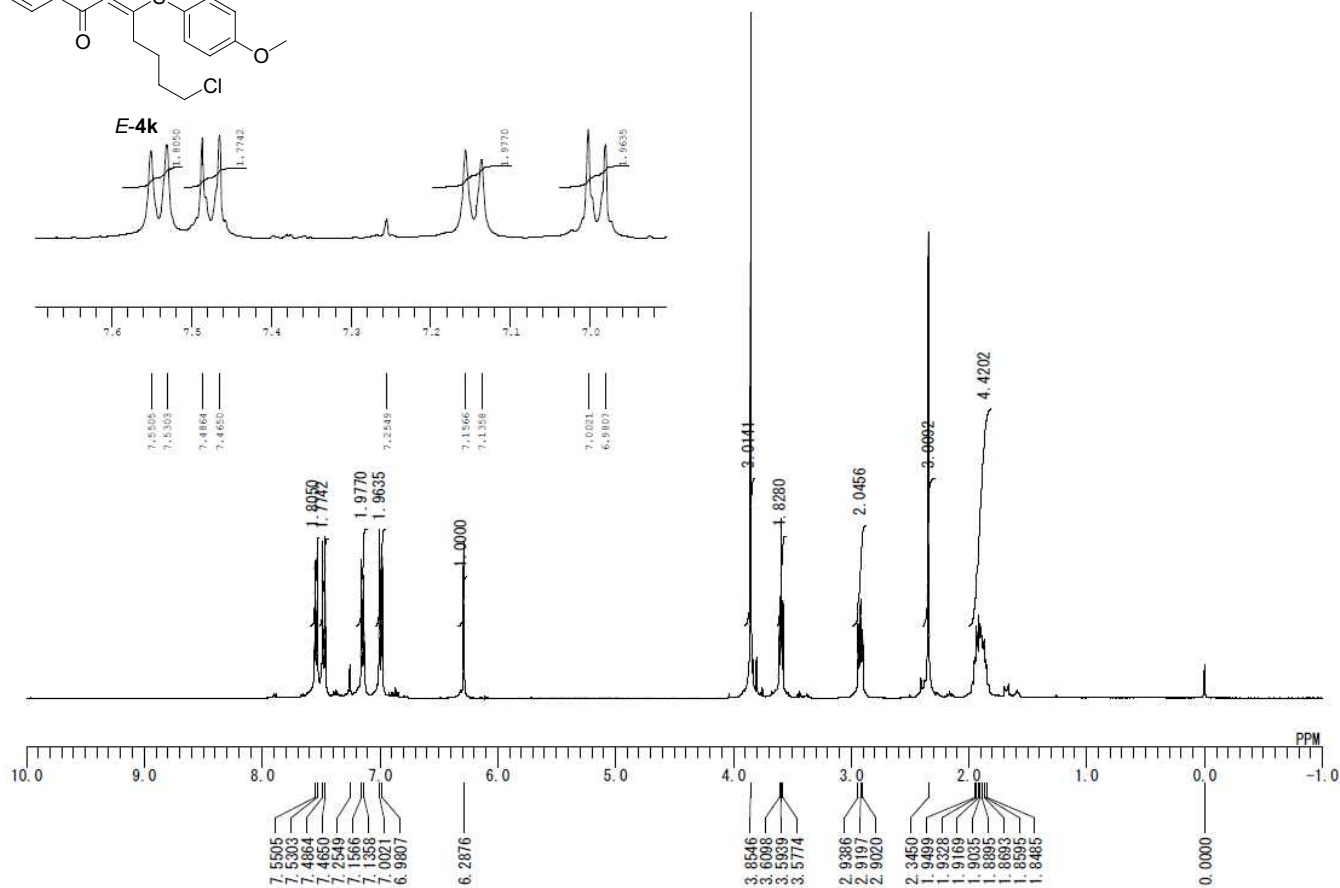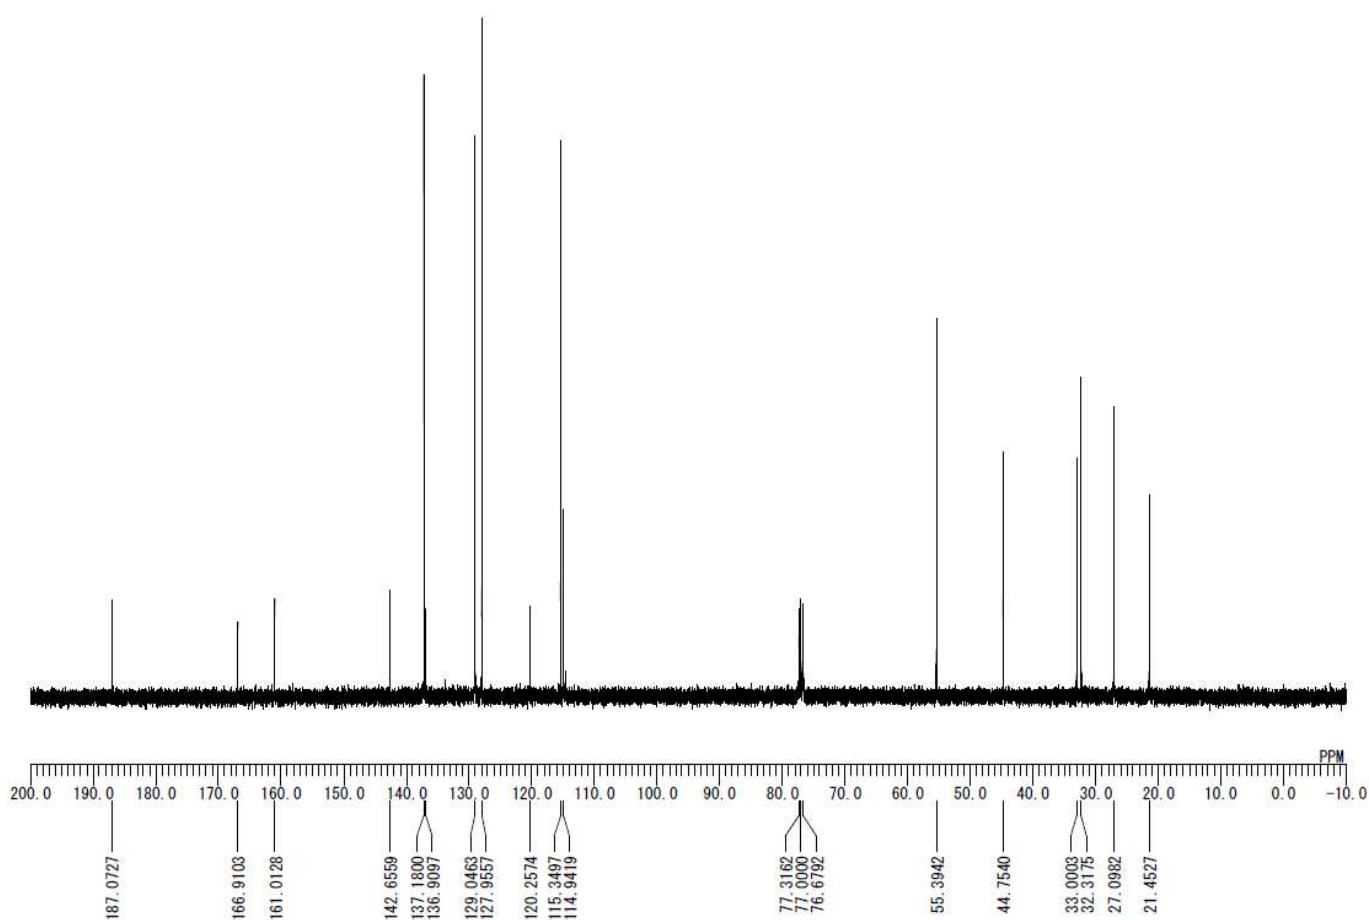



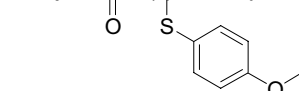

Z-4k

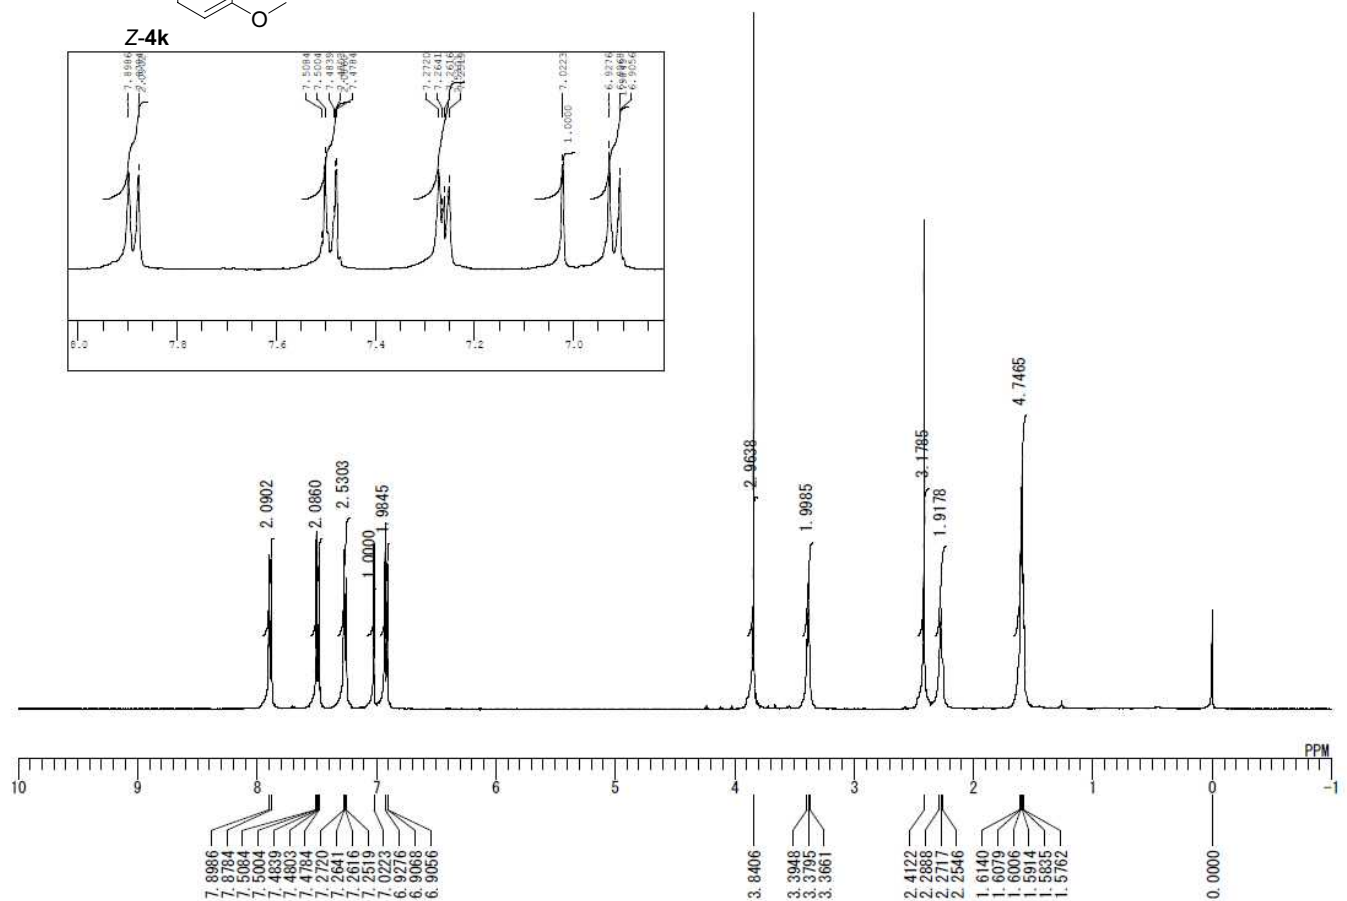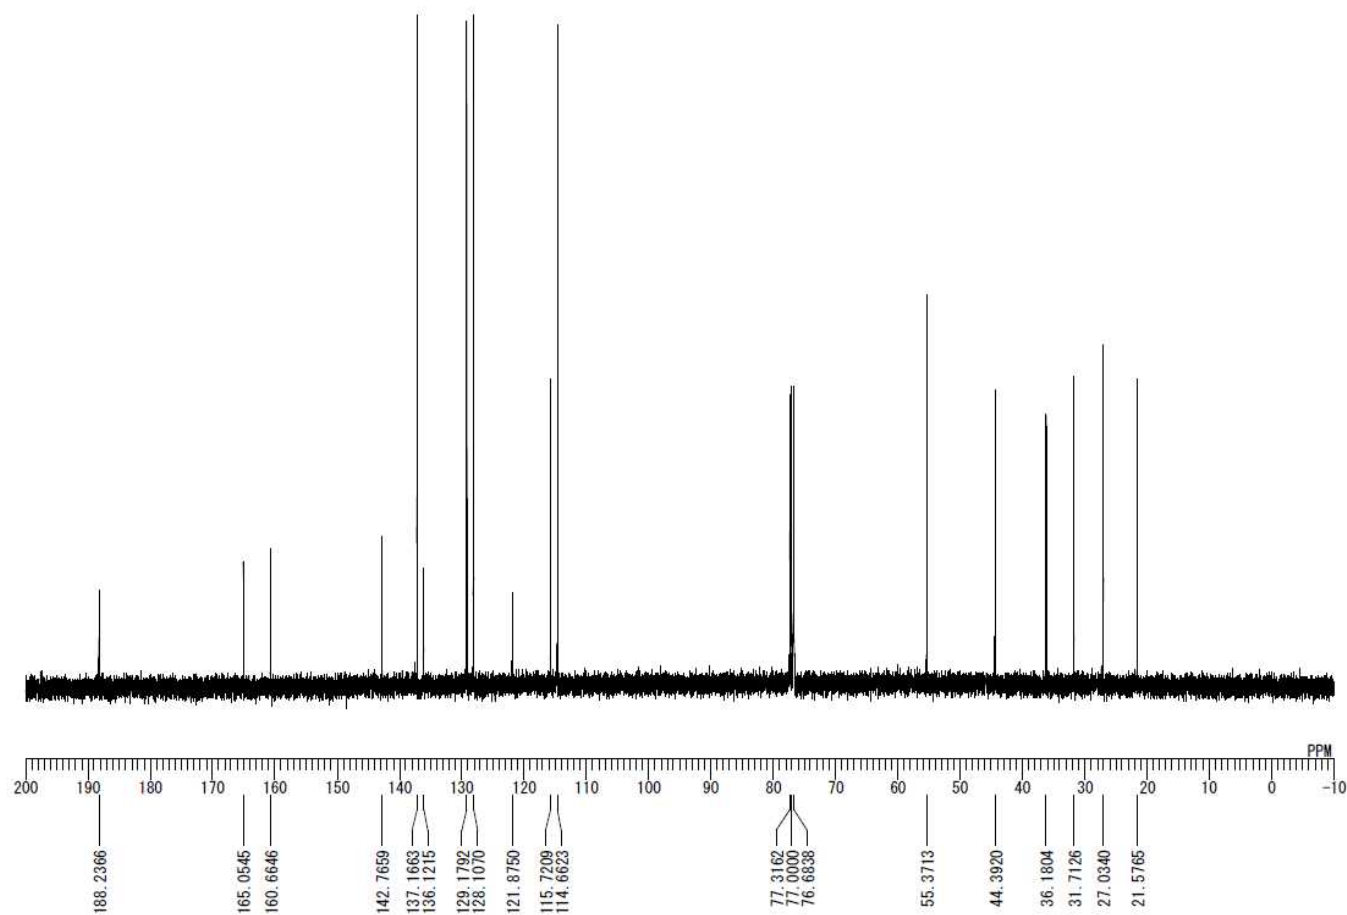

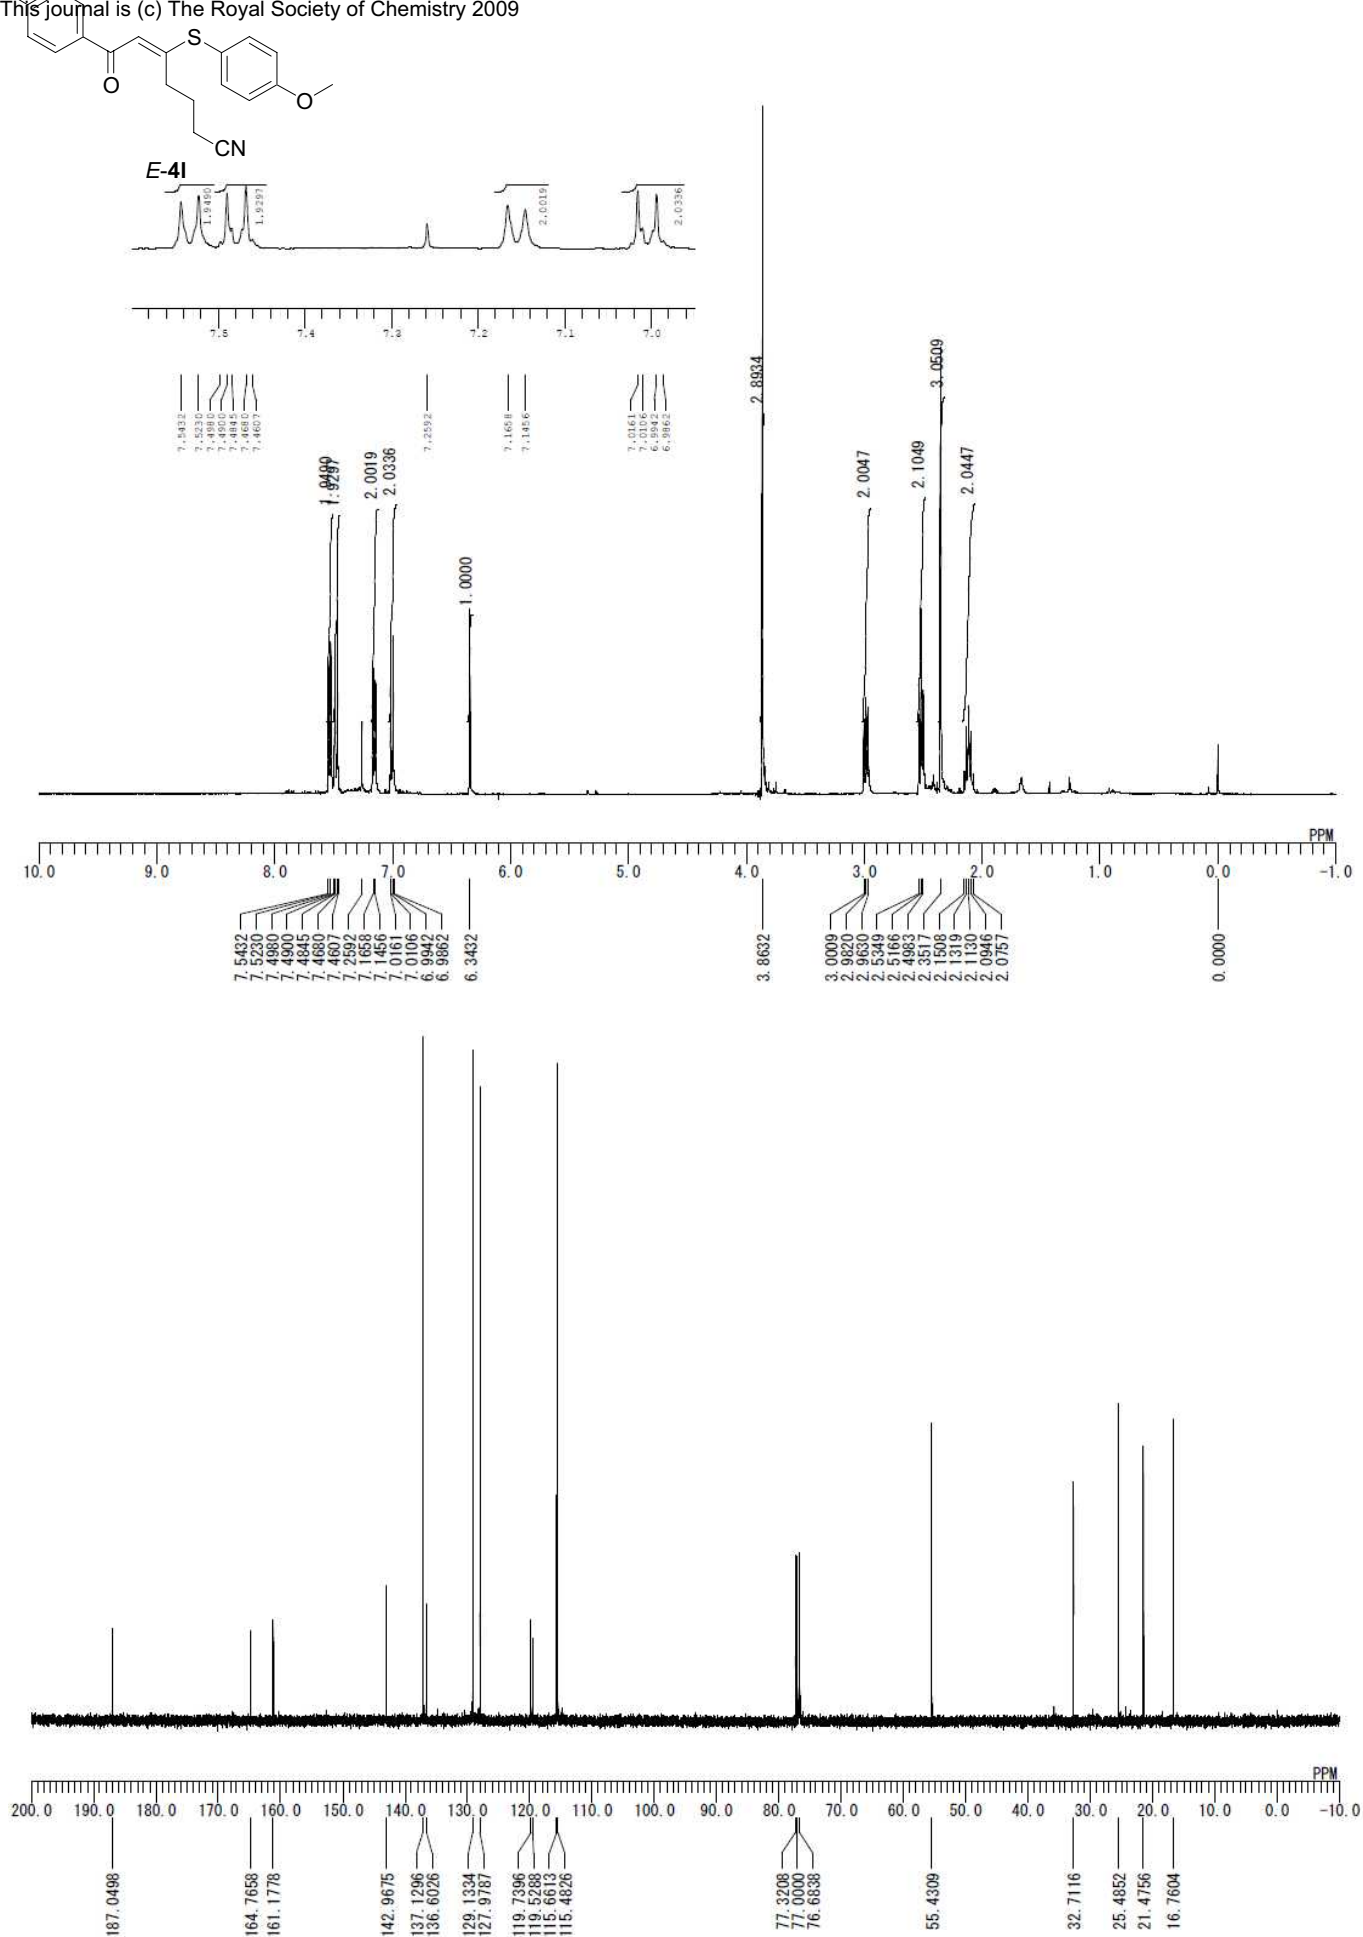

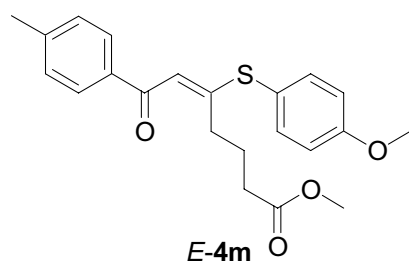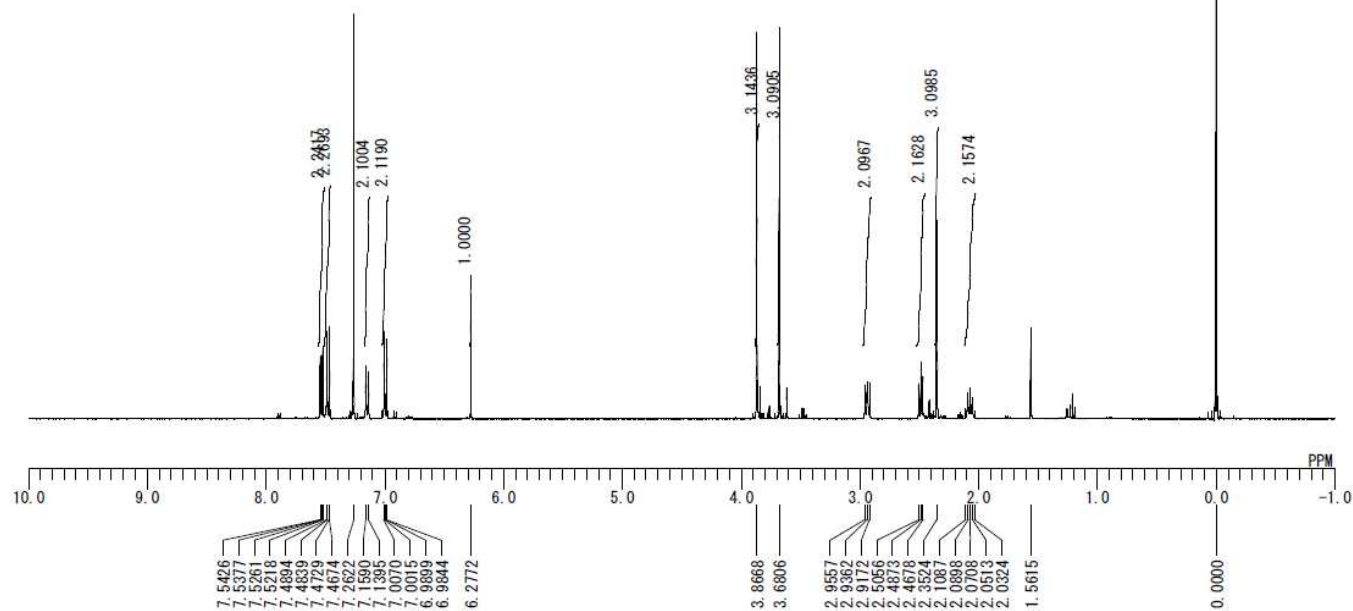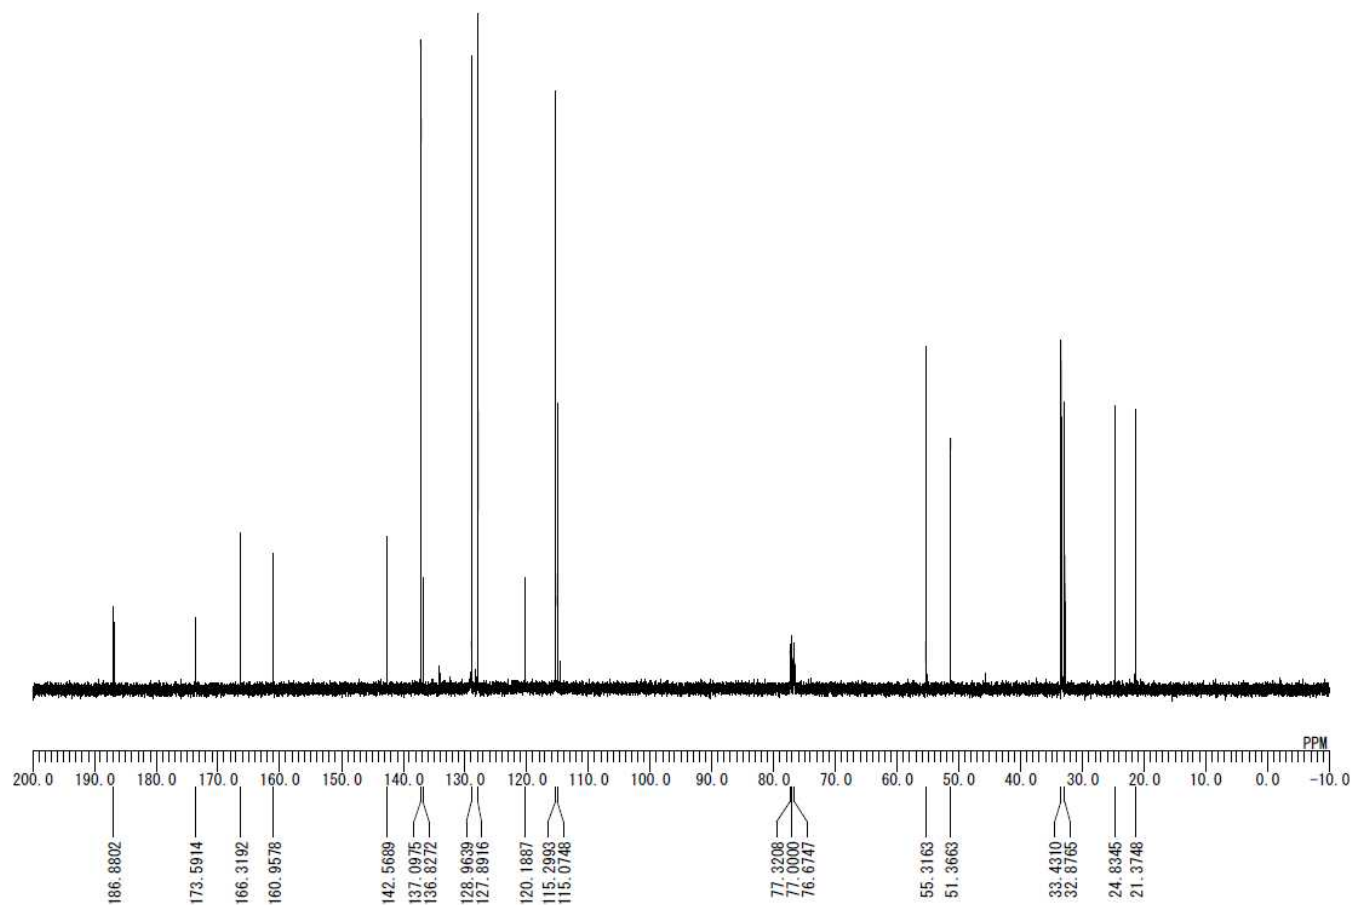

Z-4m

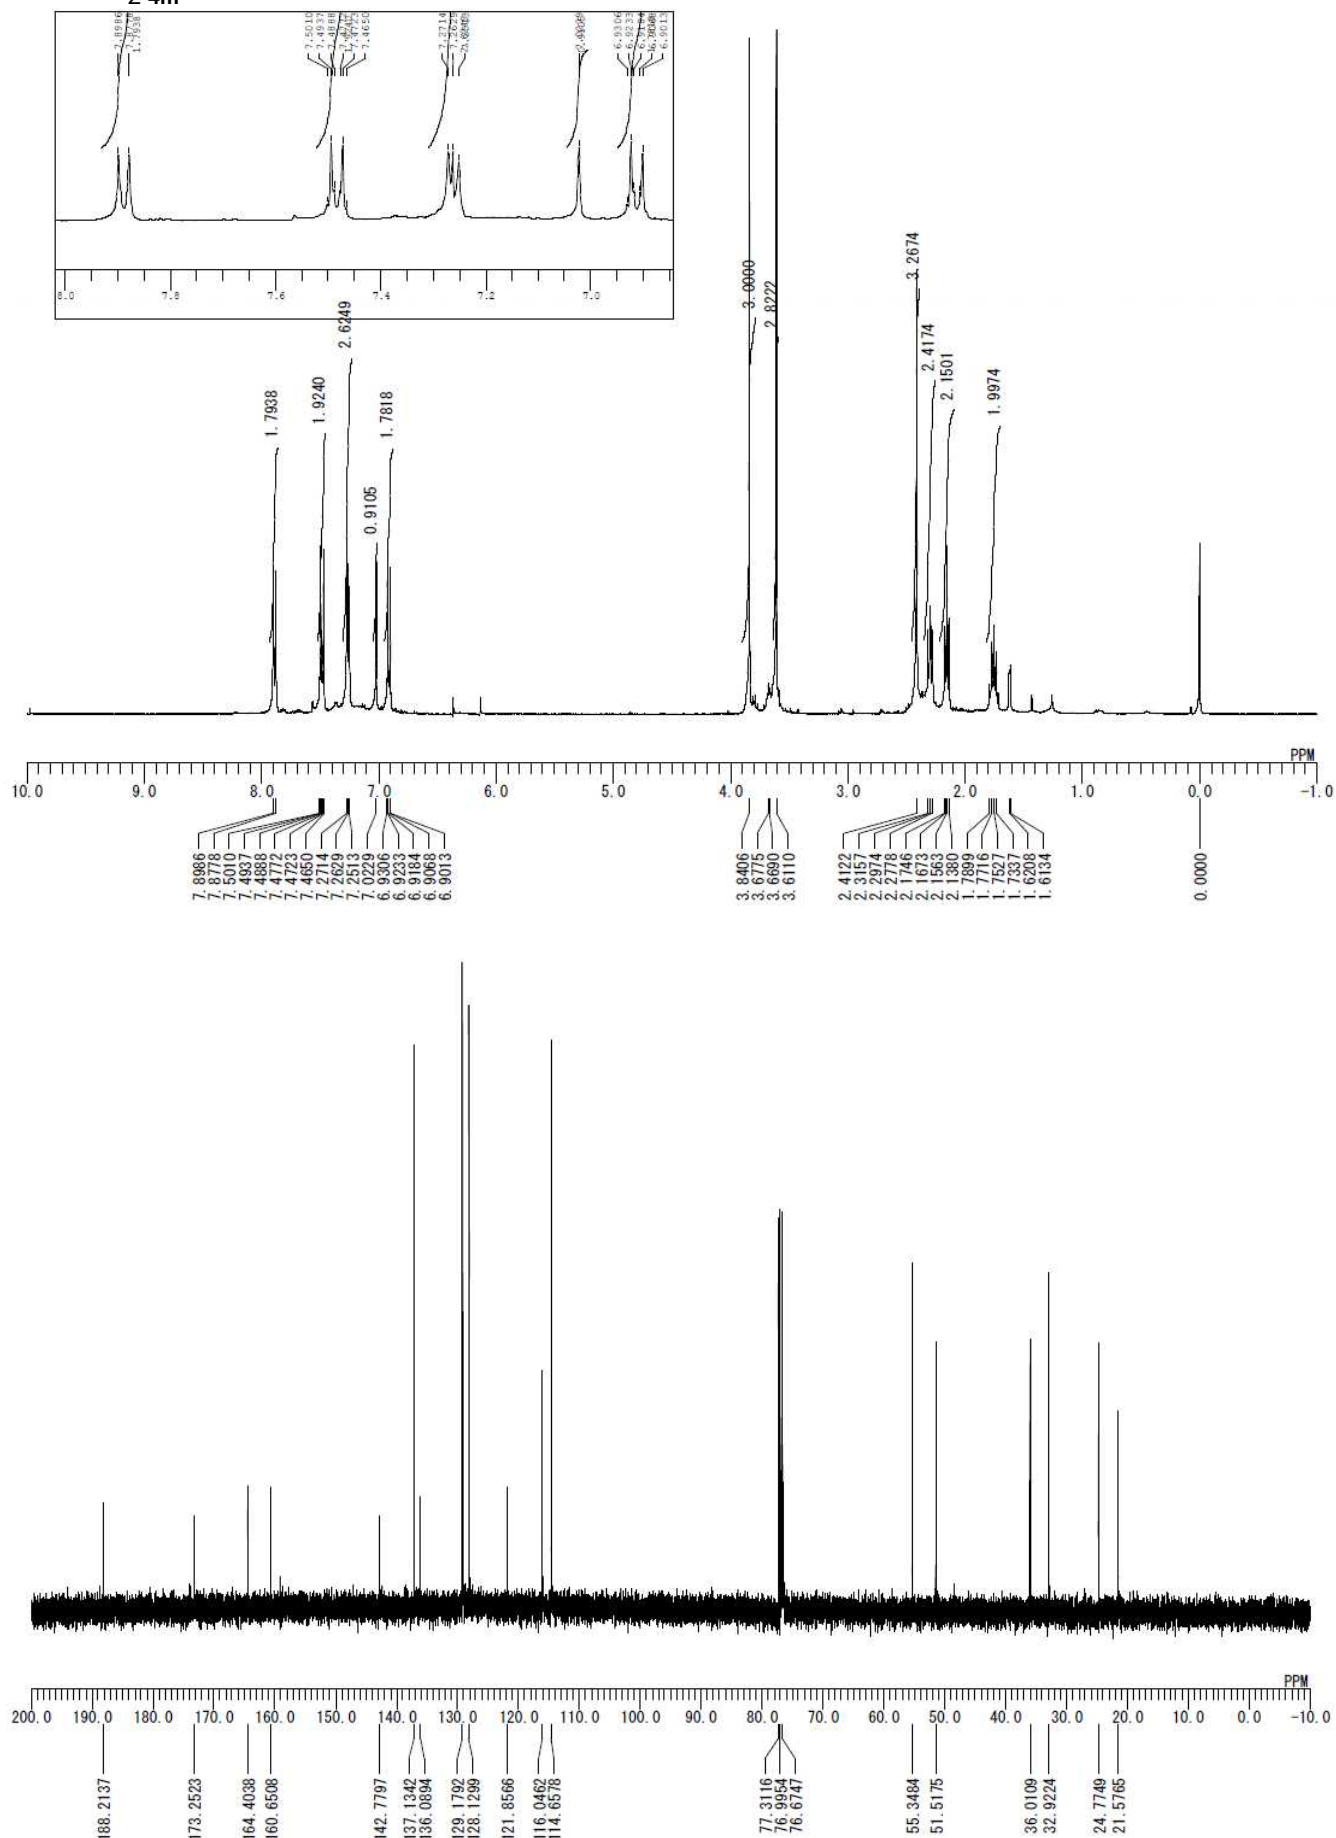

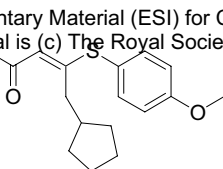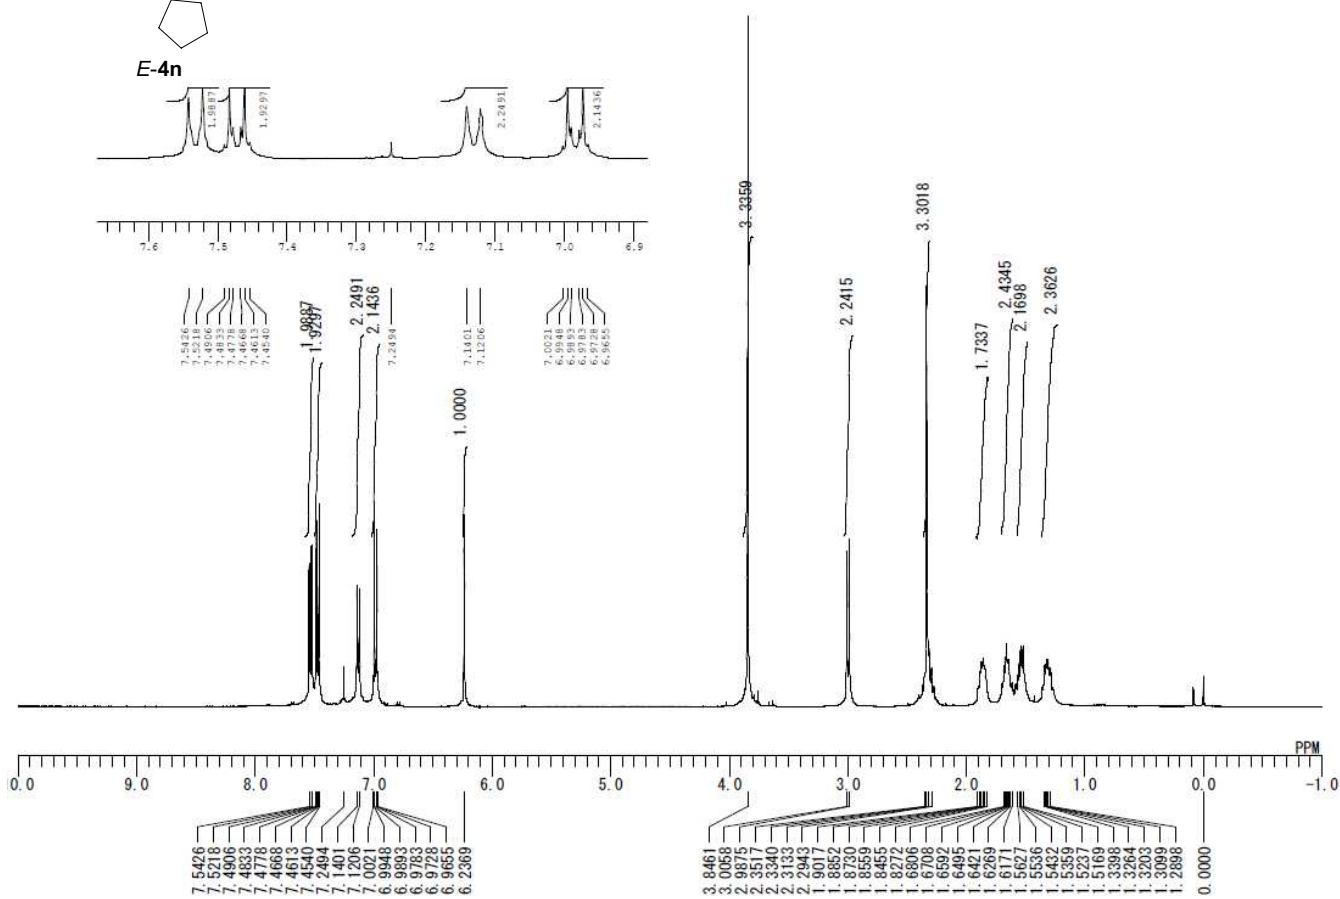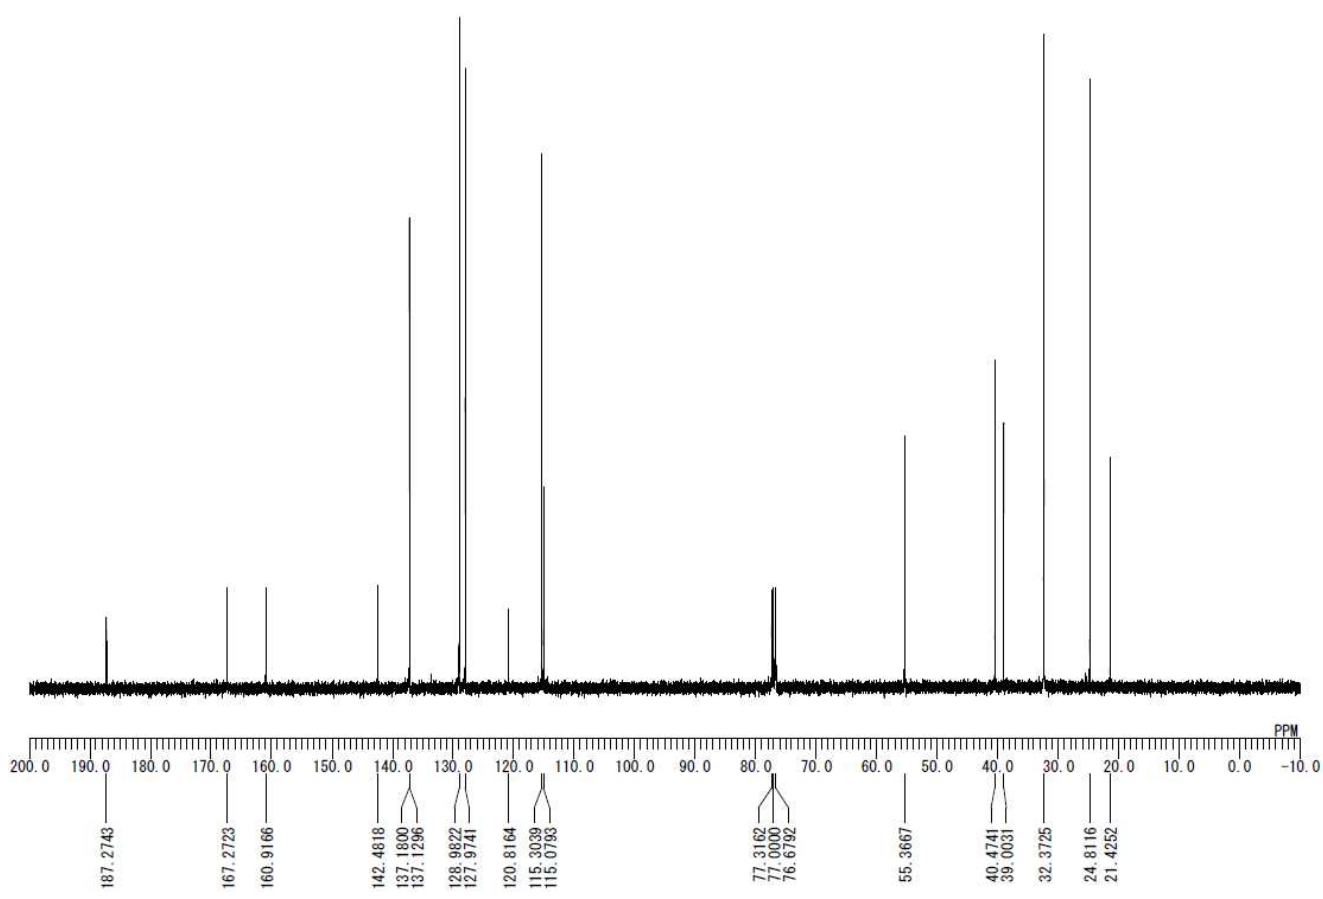

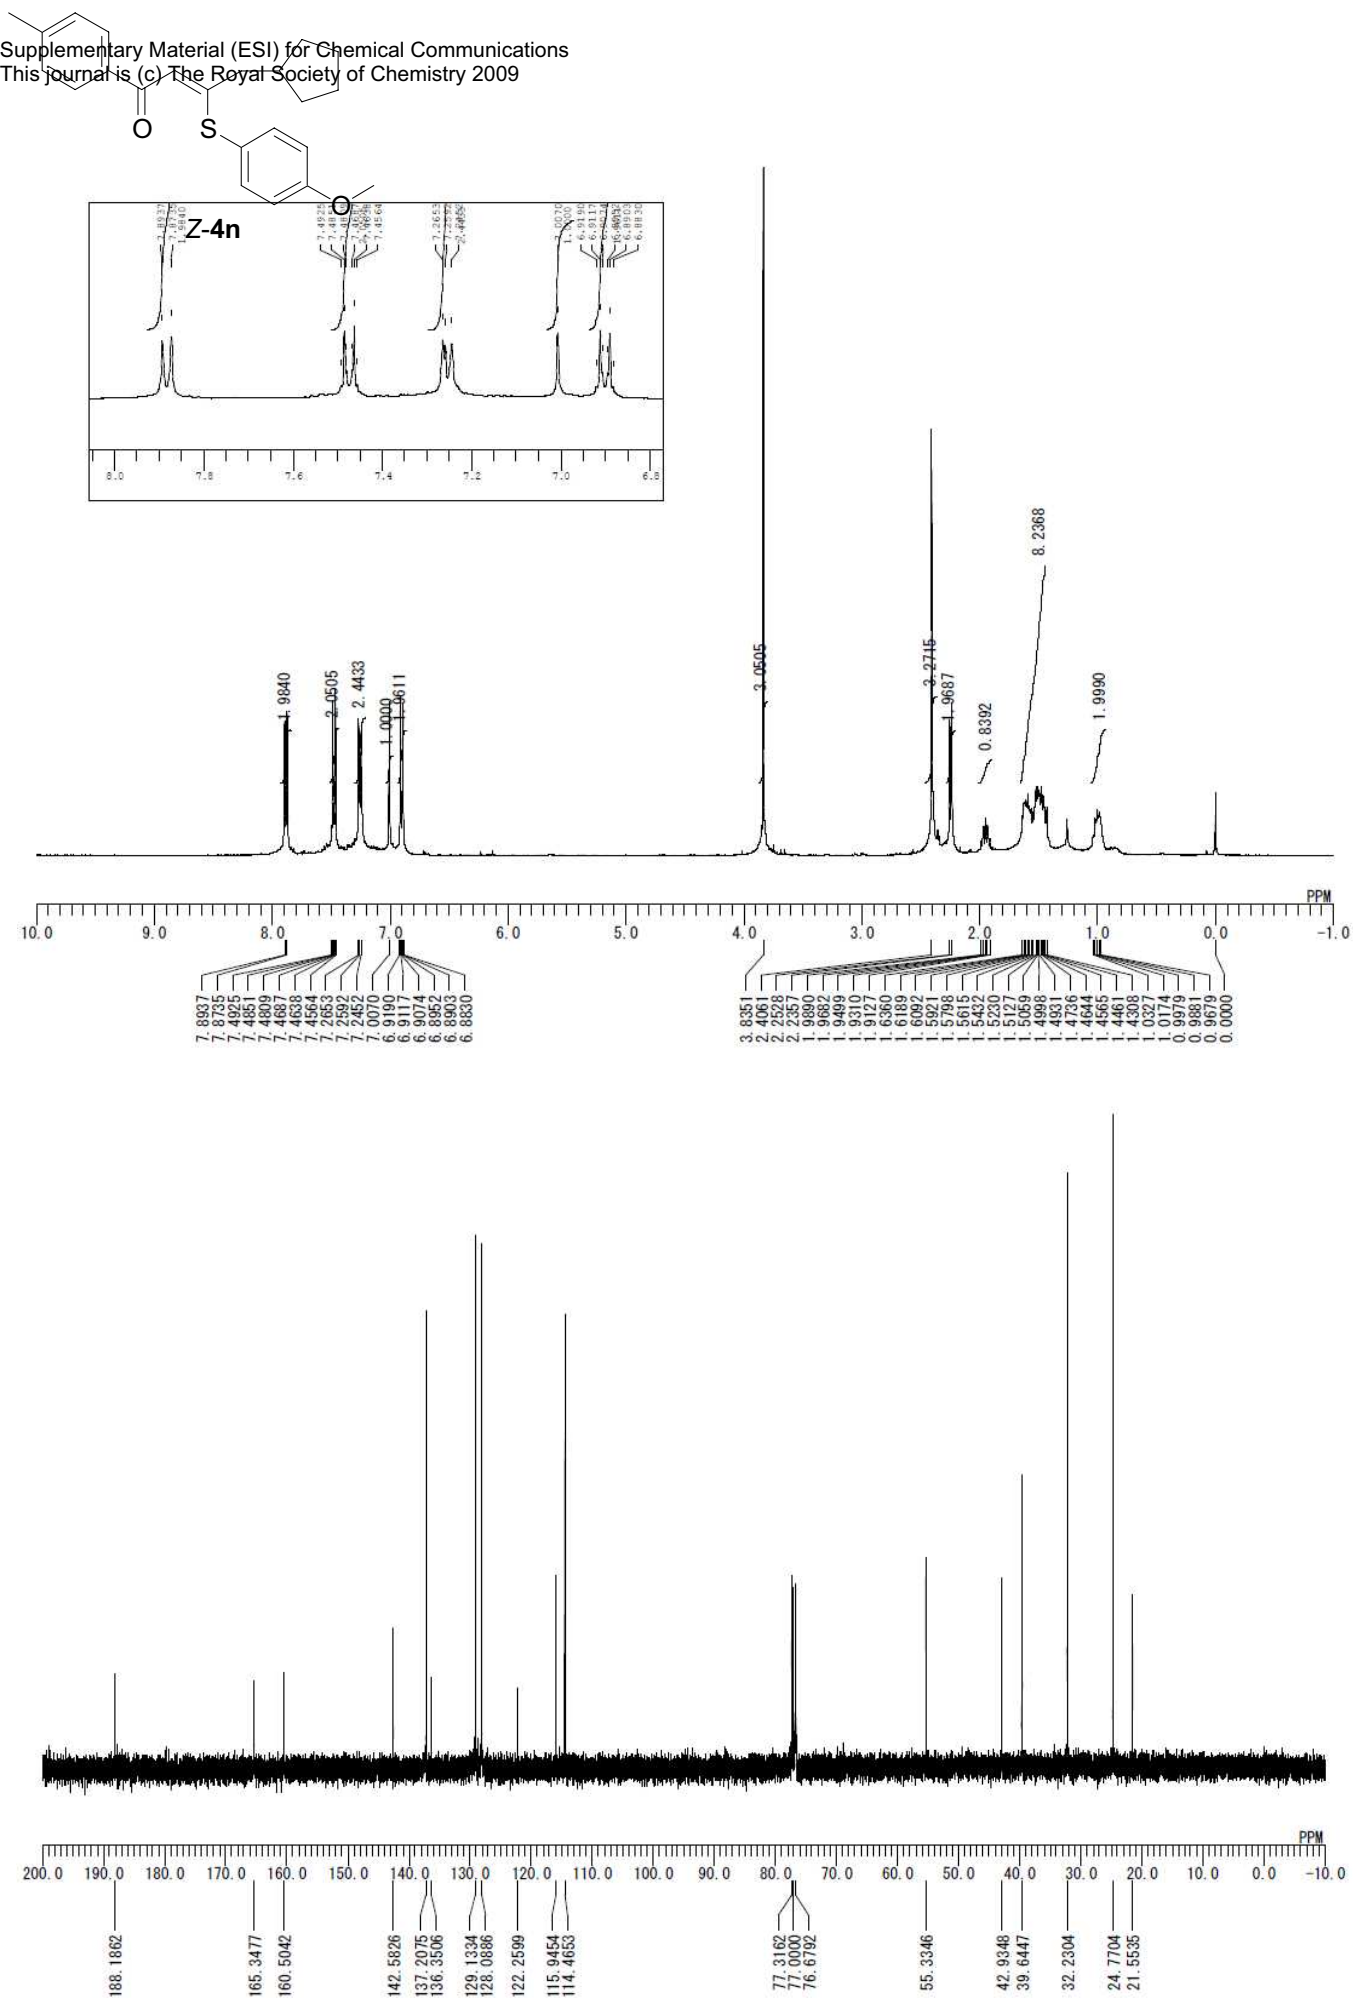

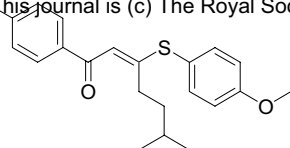

*E*-4o

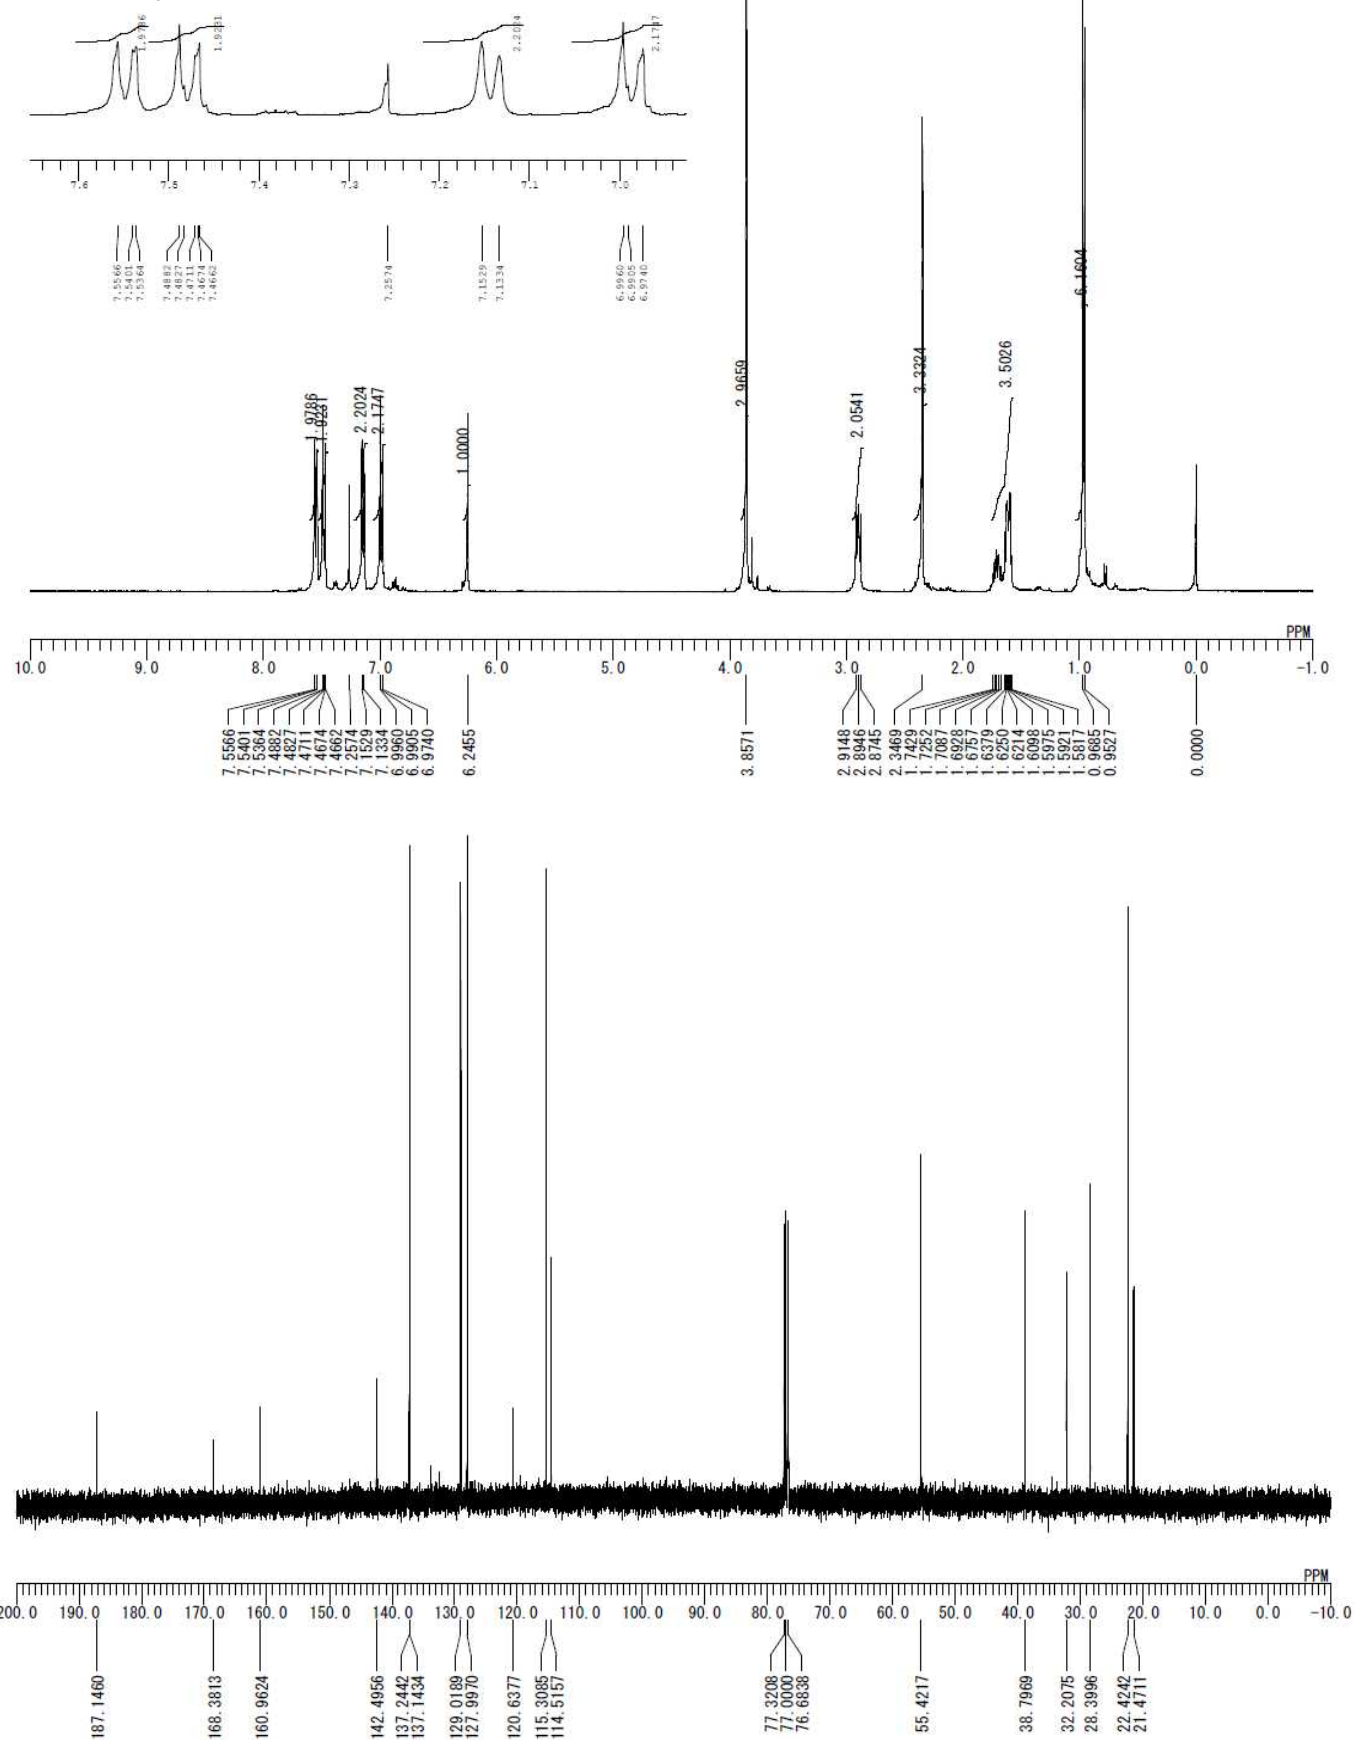



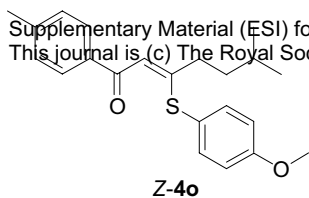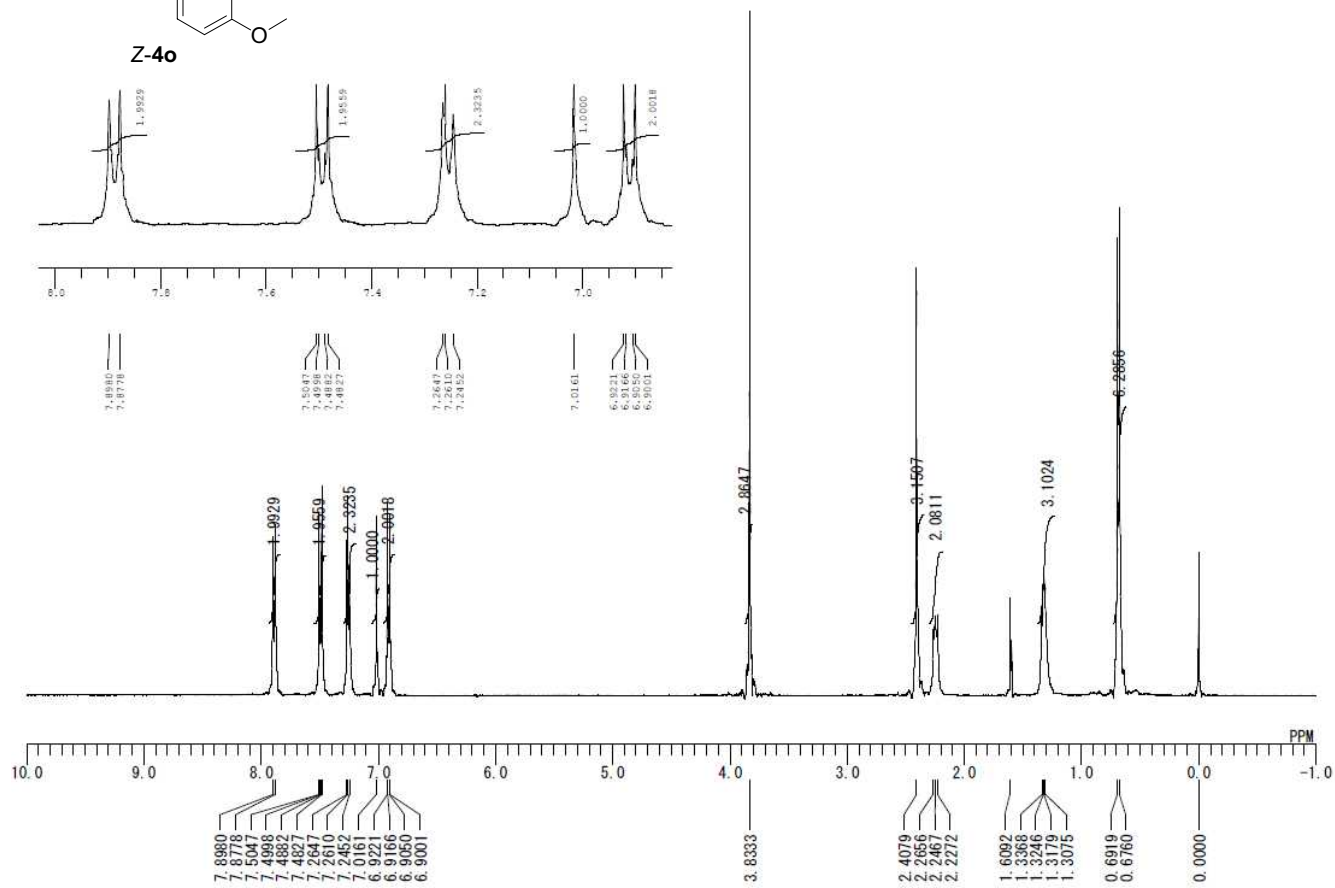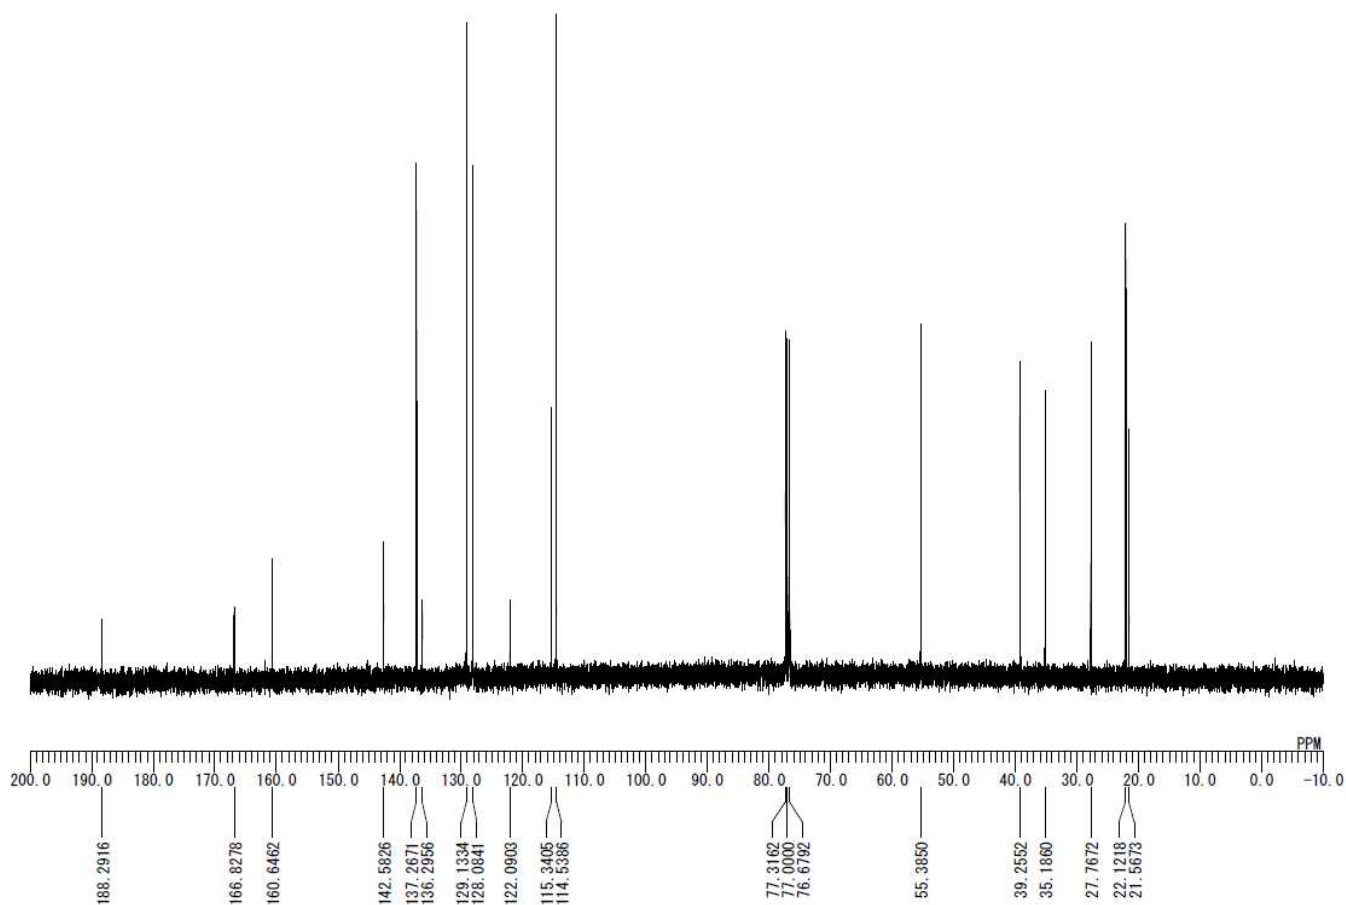



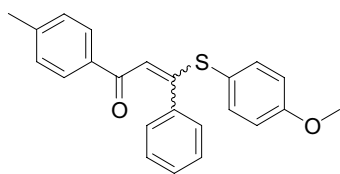

4p (E/Z = 74/26)

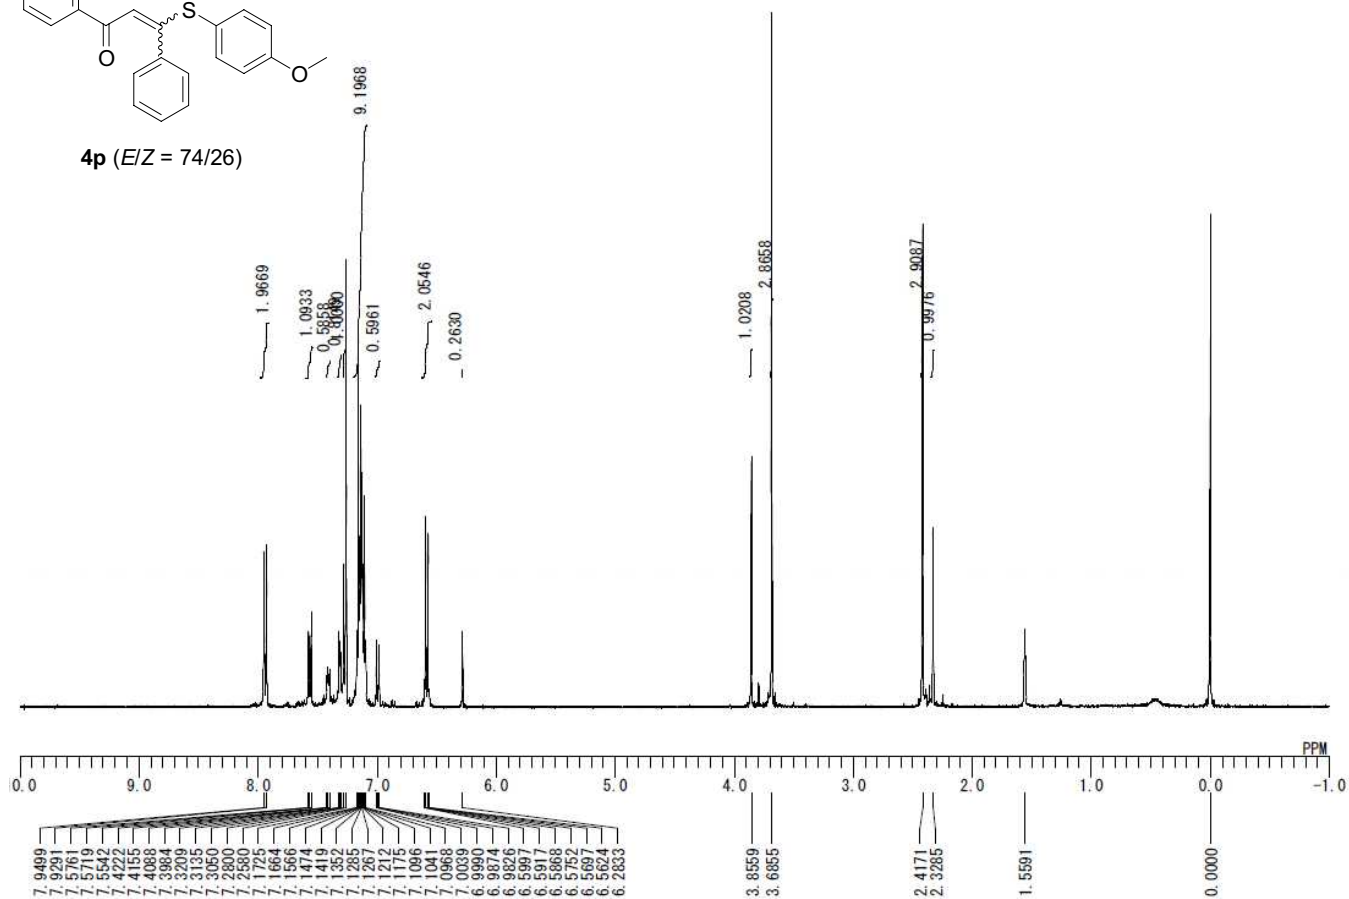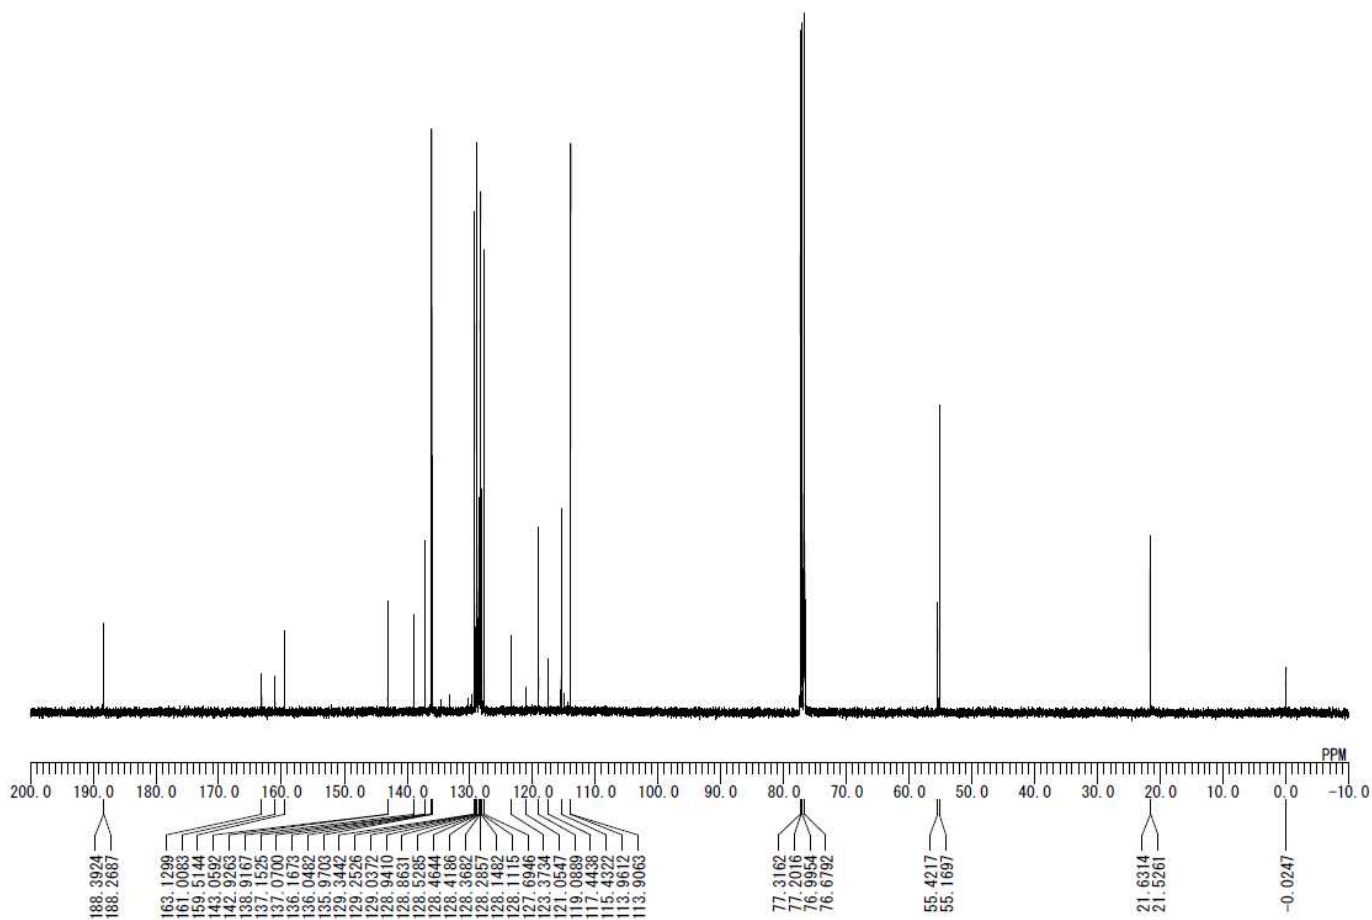

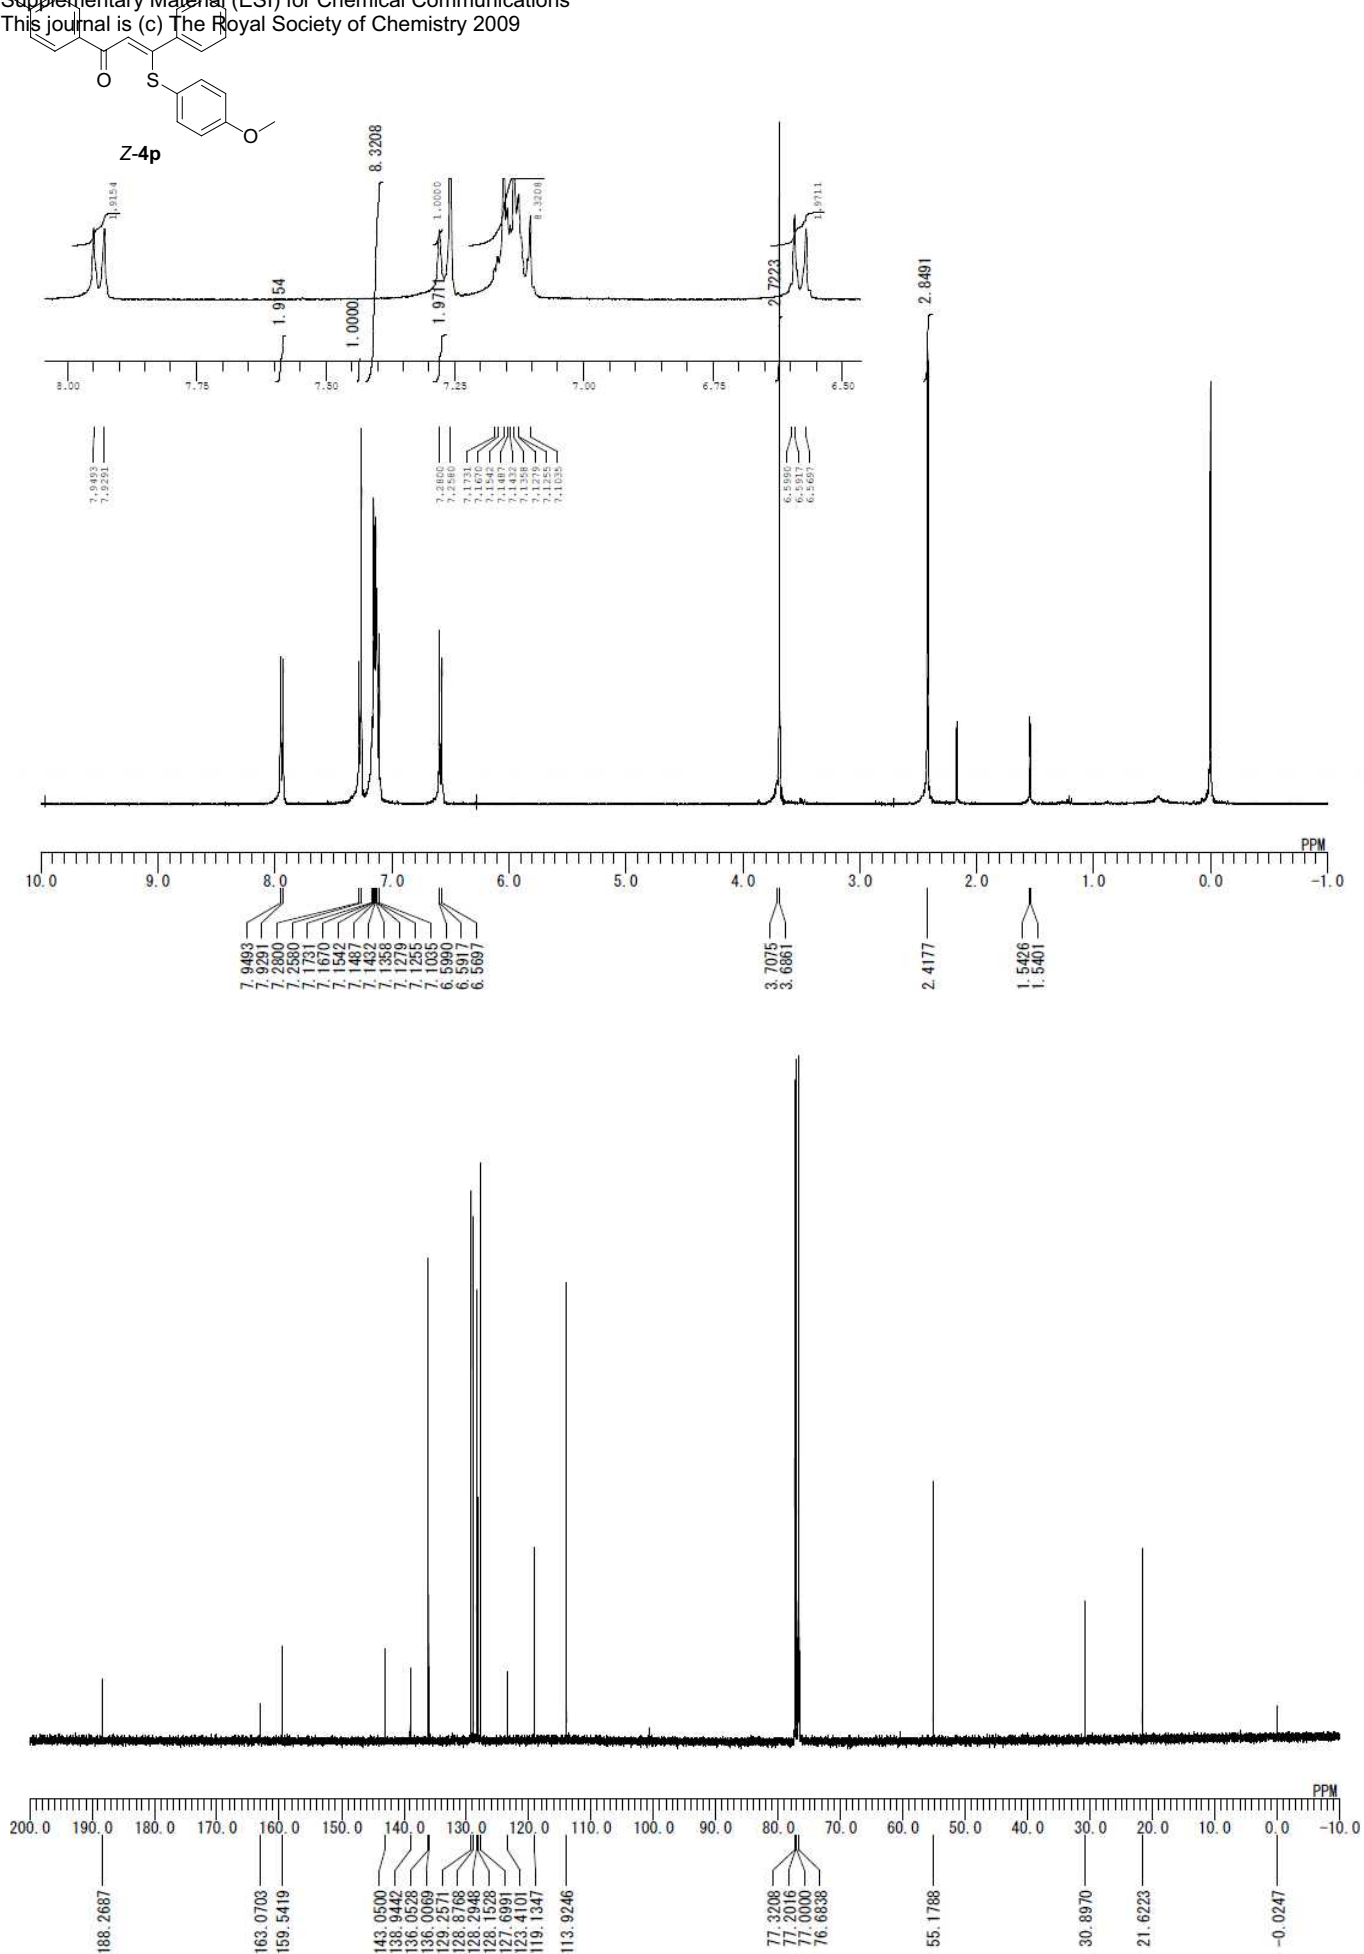

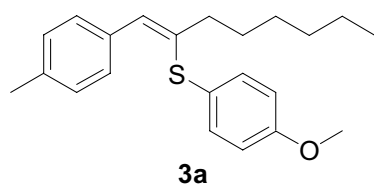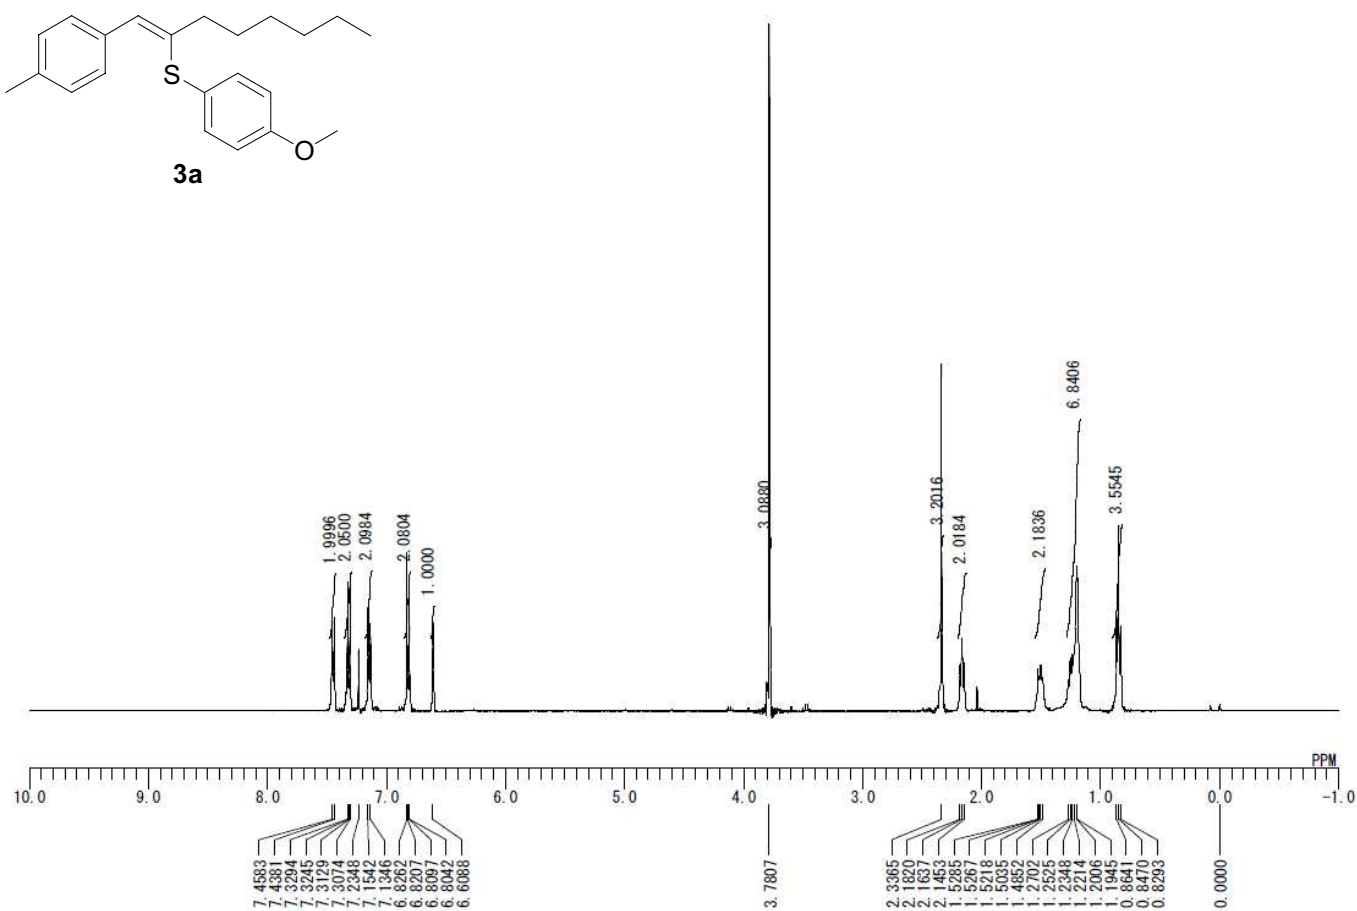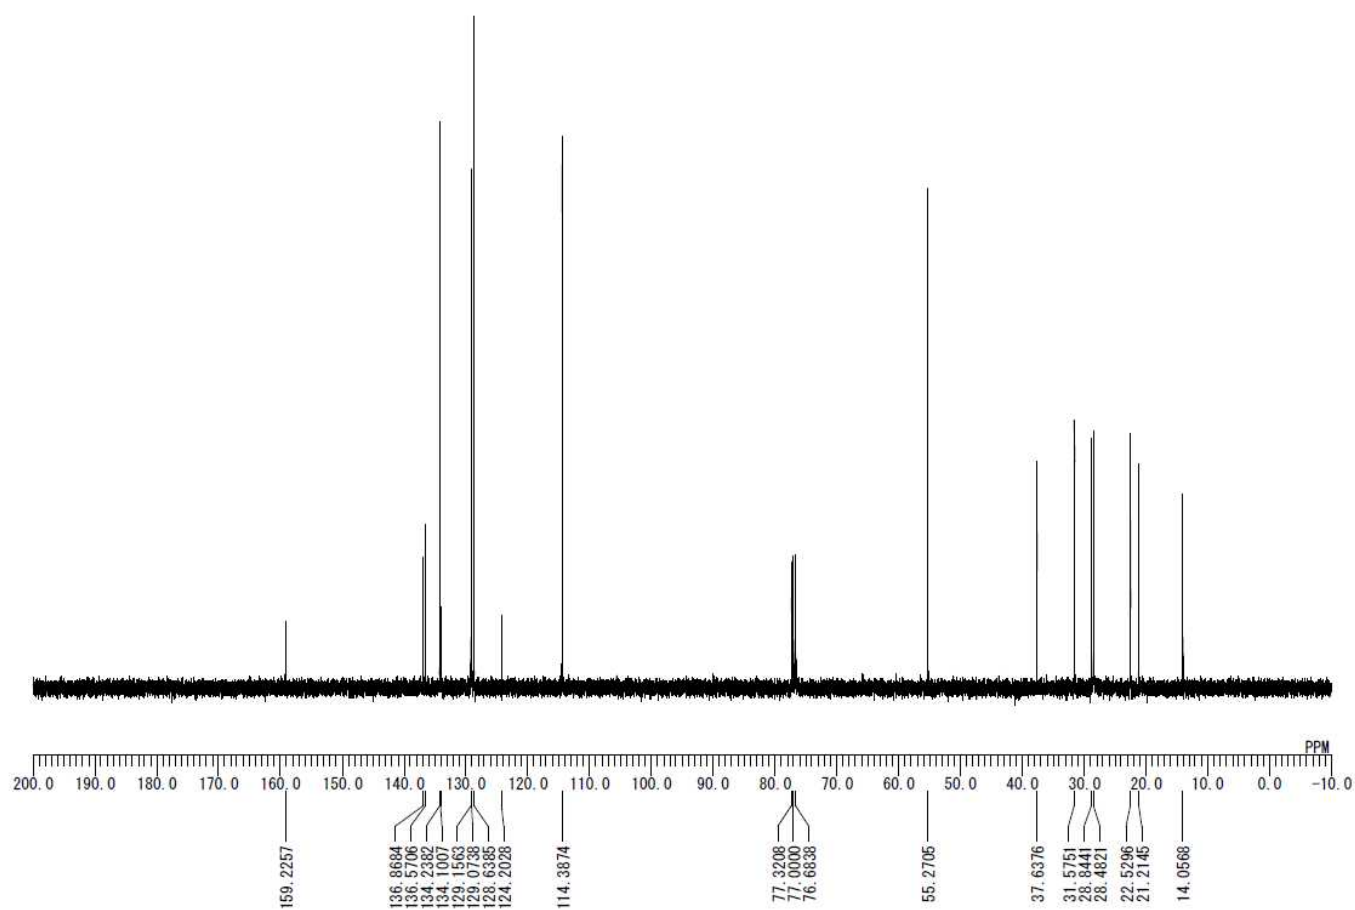

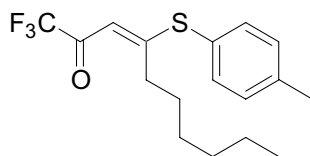

**E-8a**

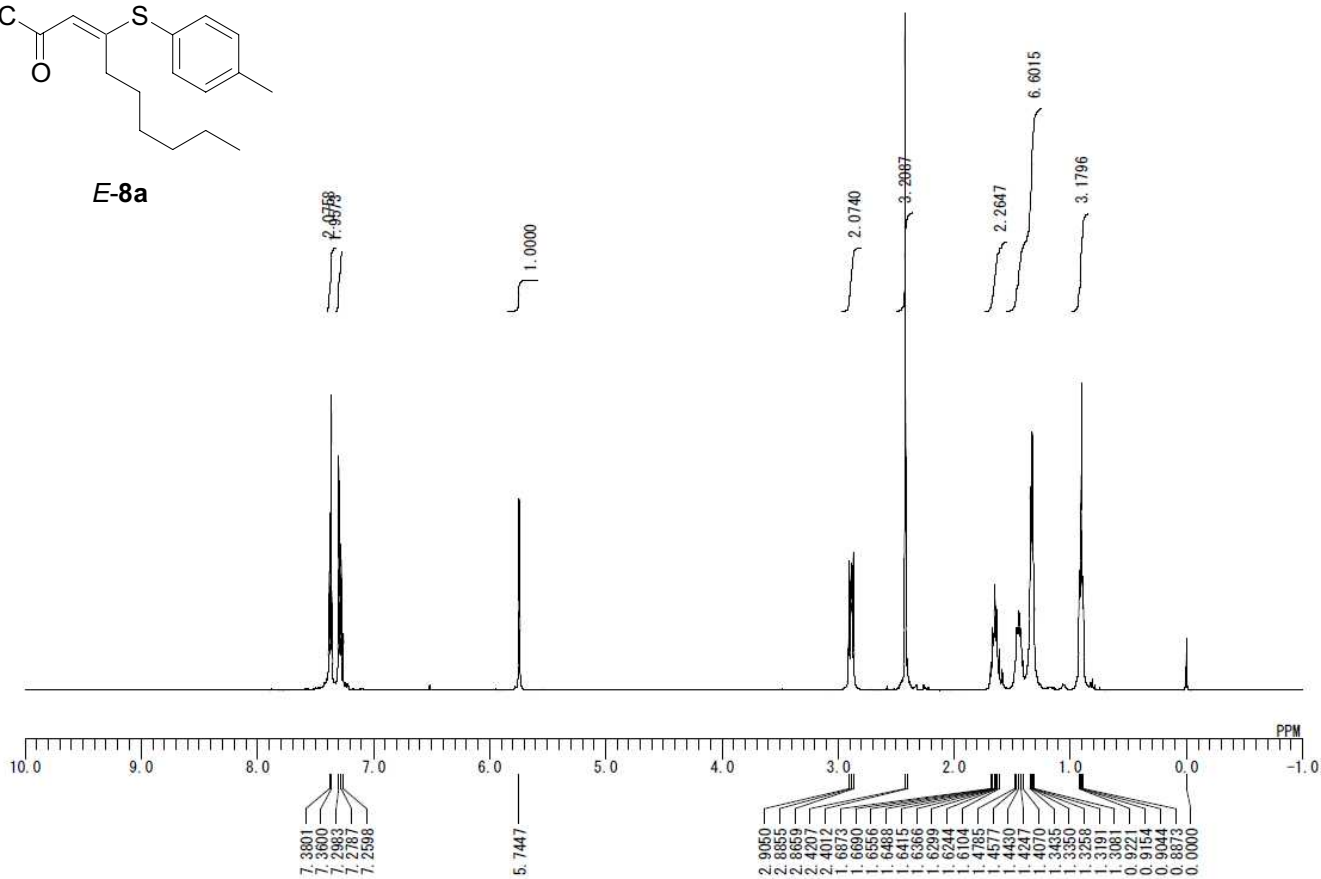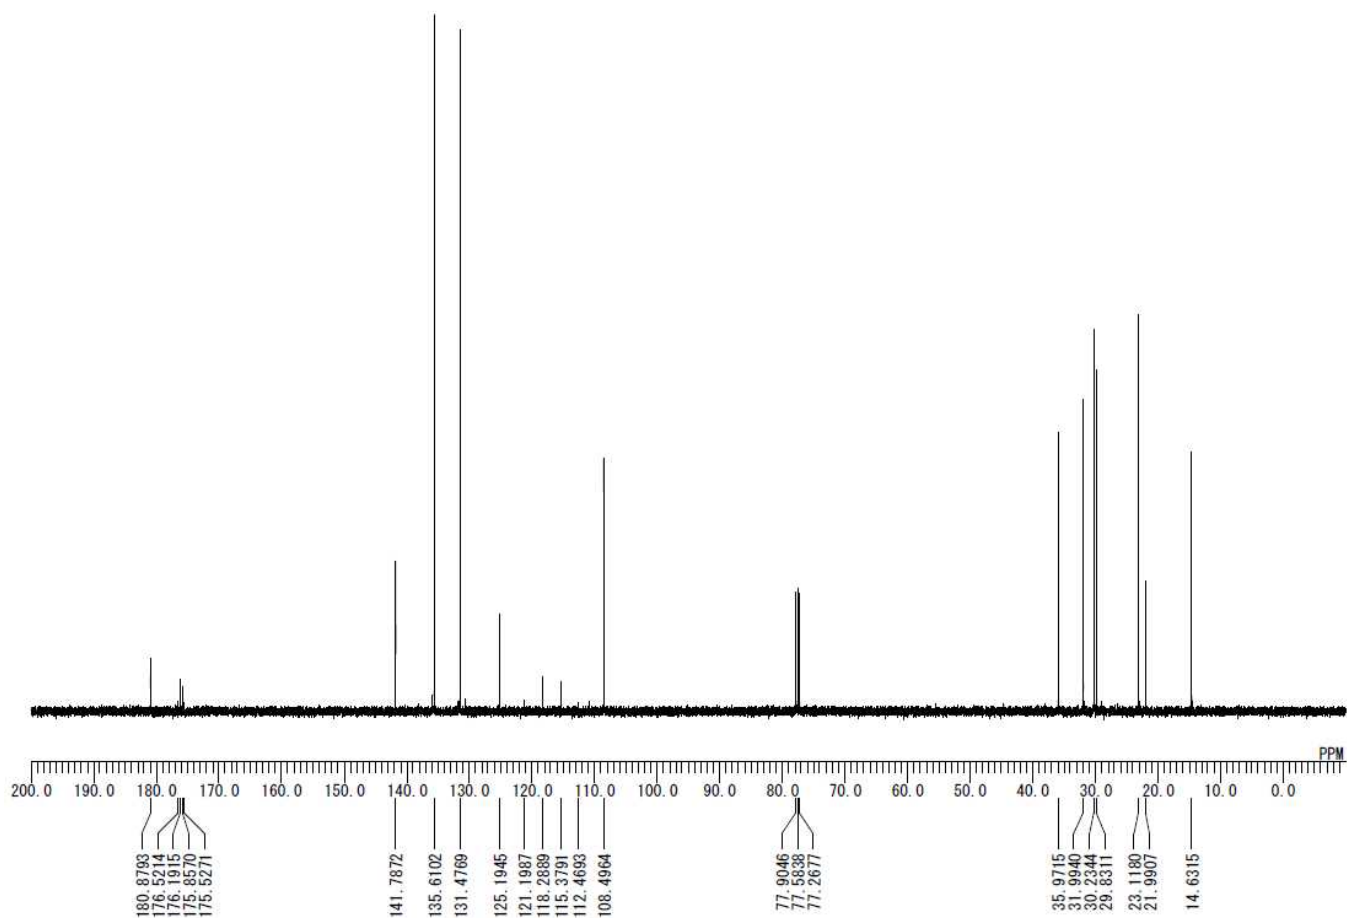

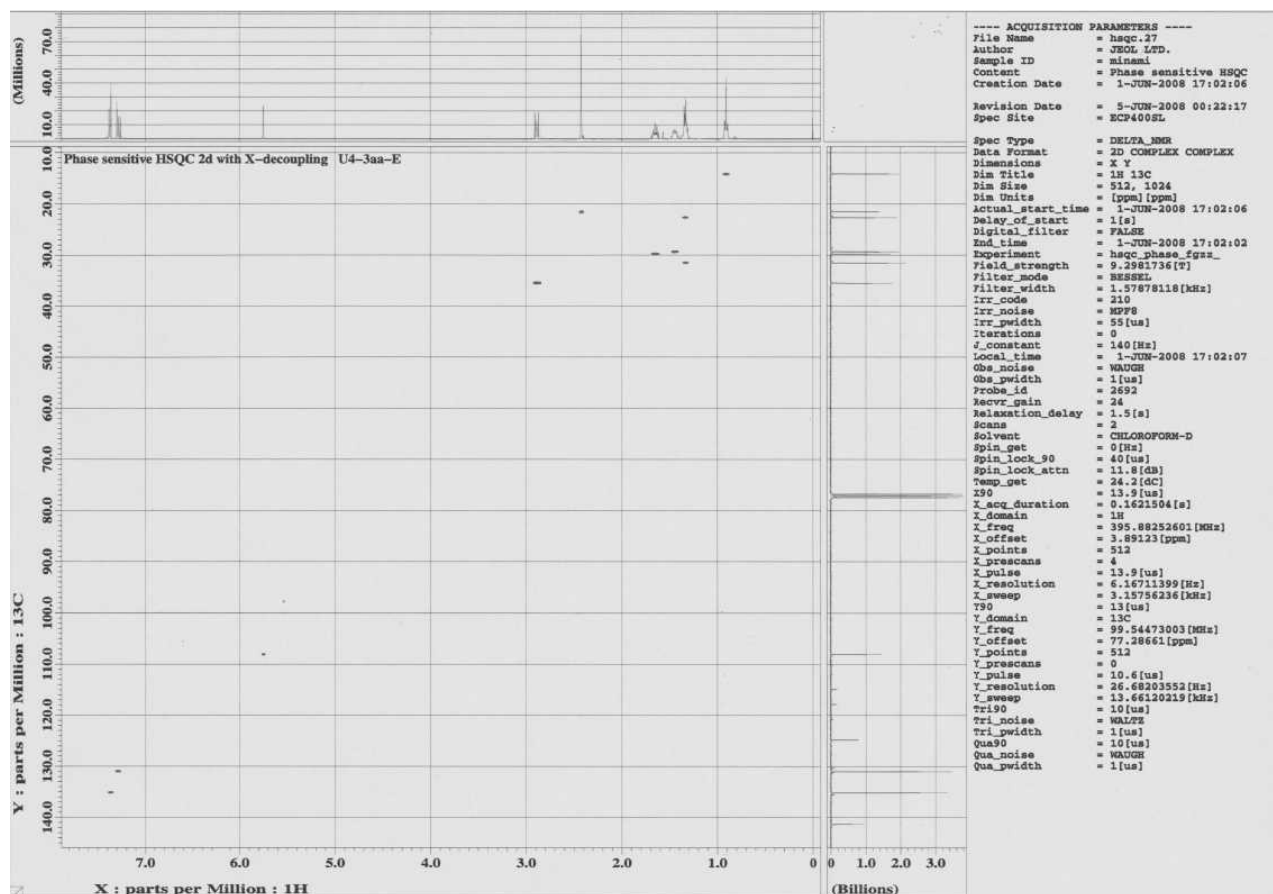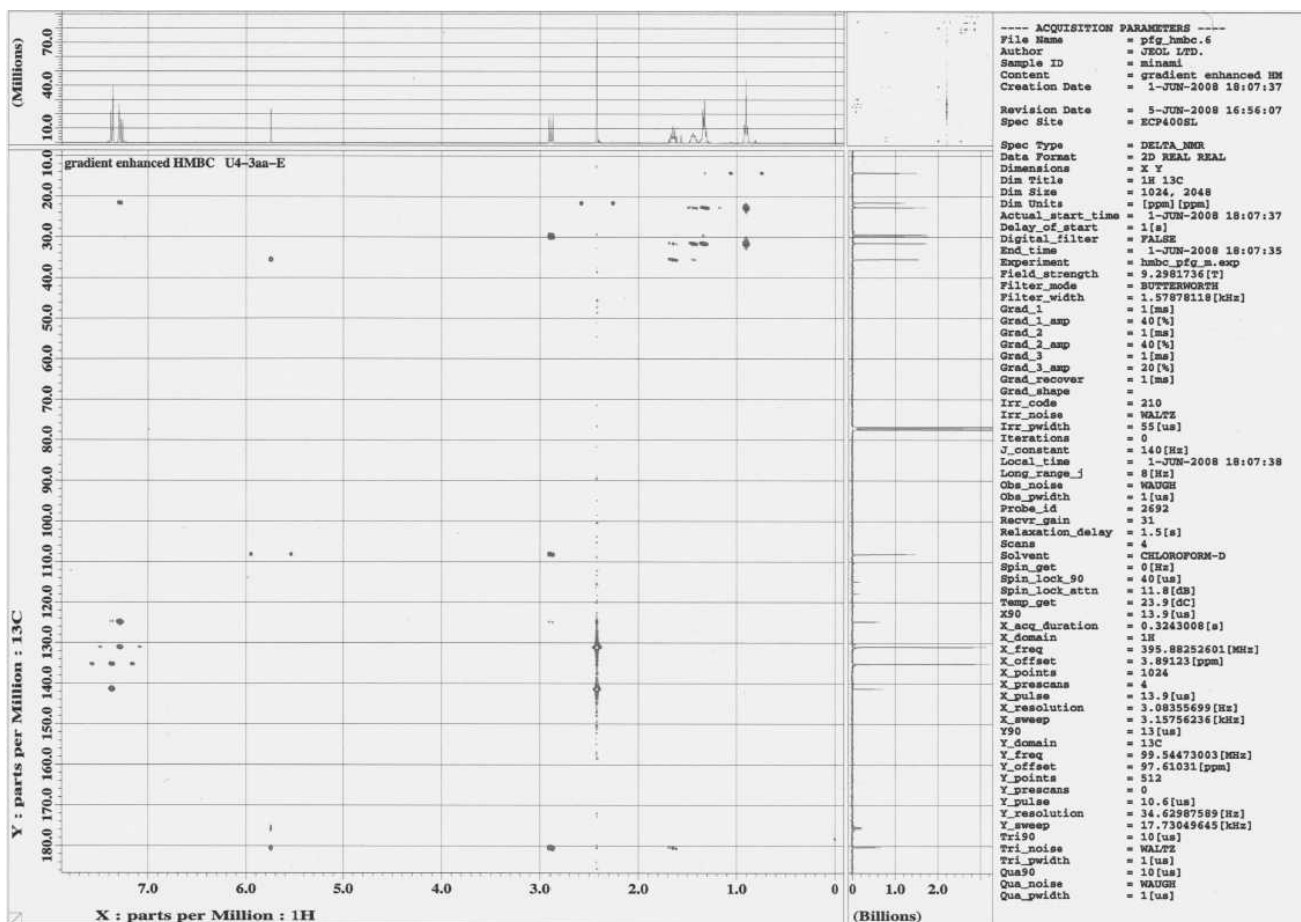

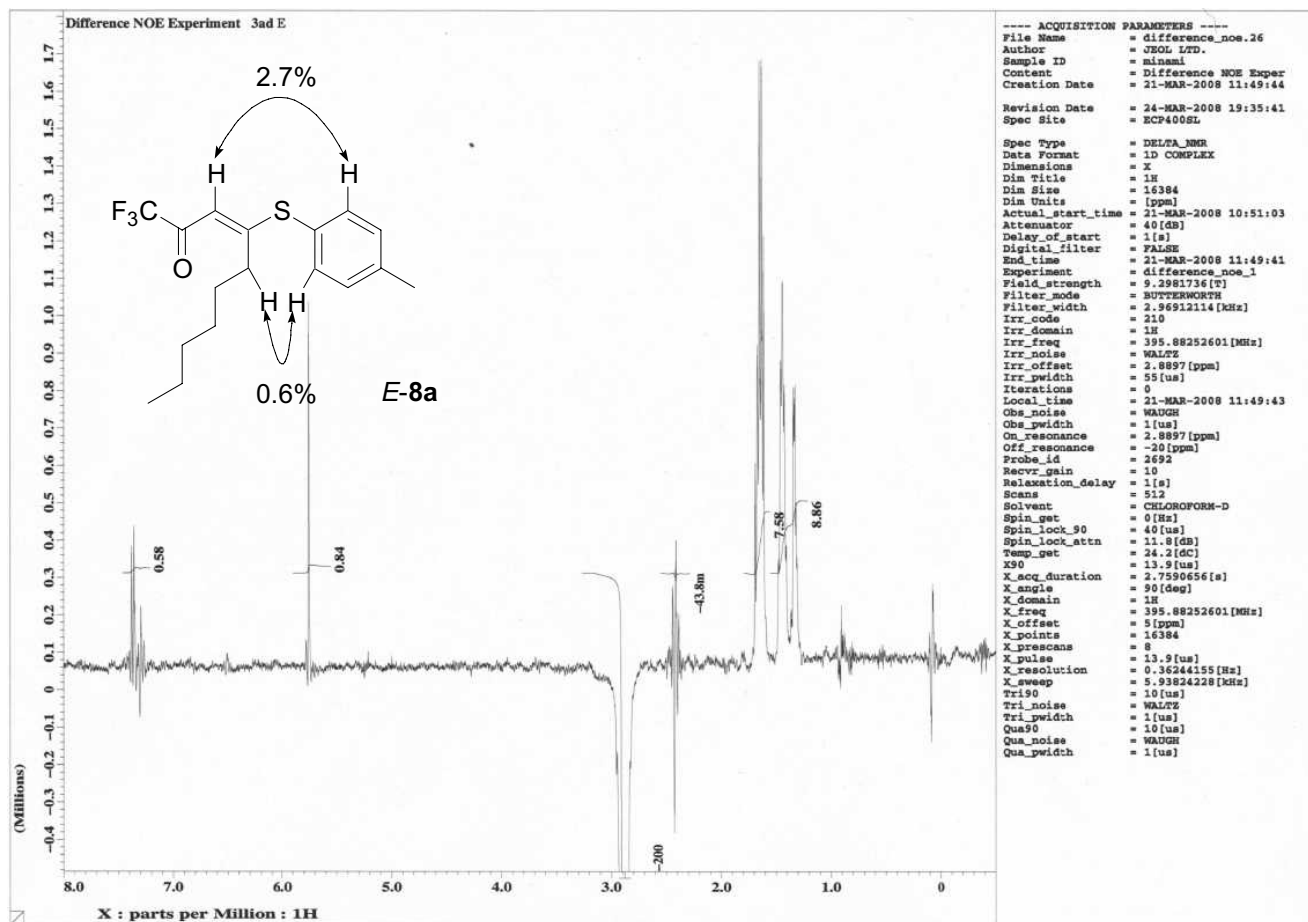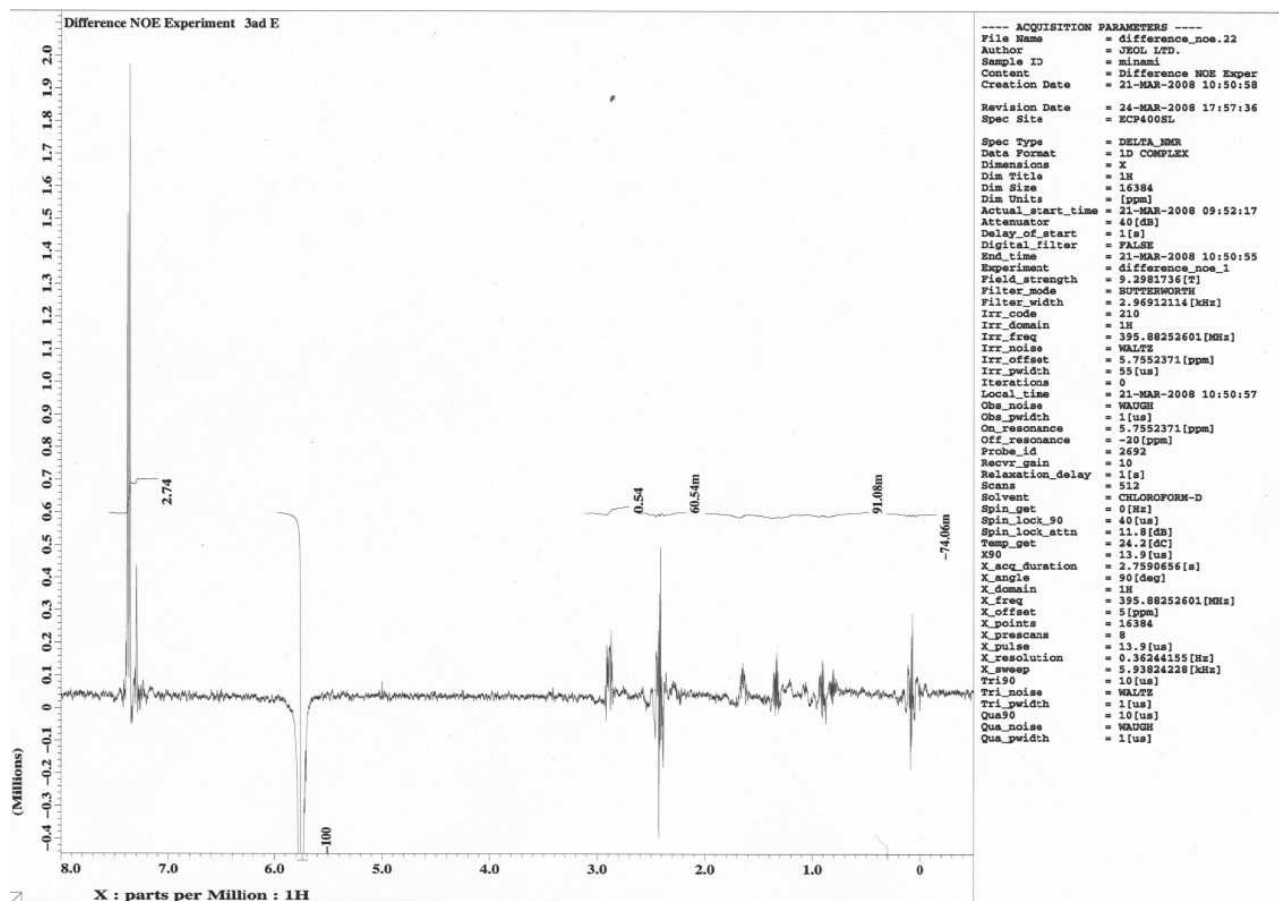

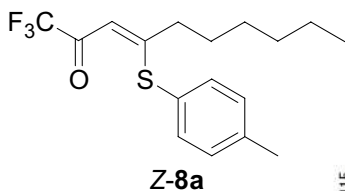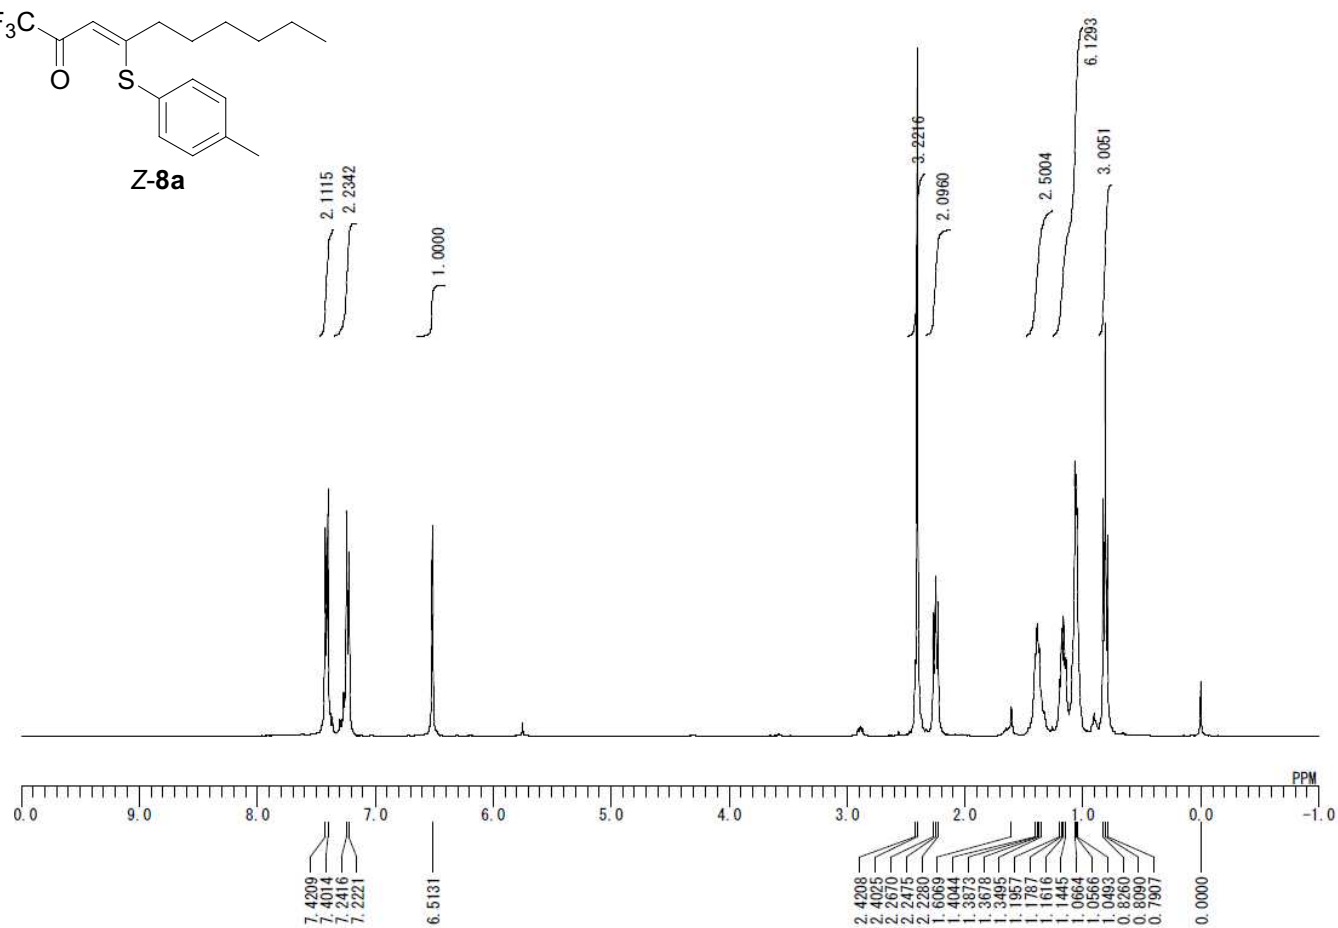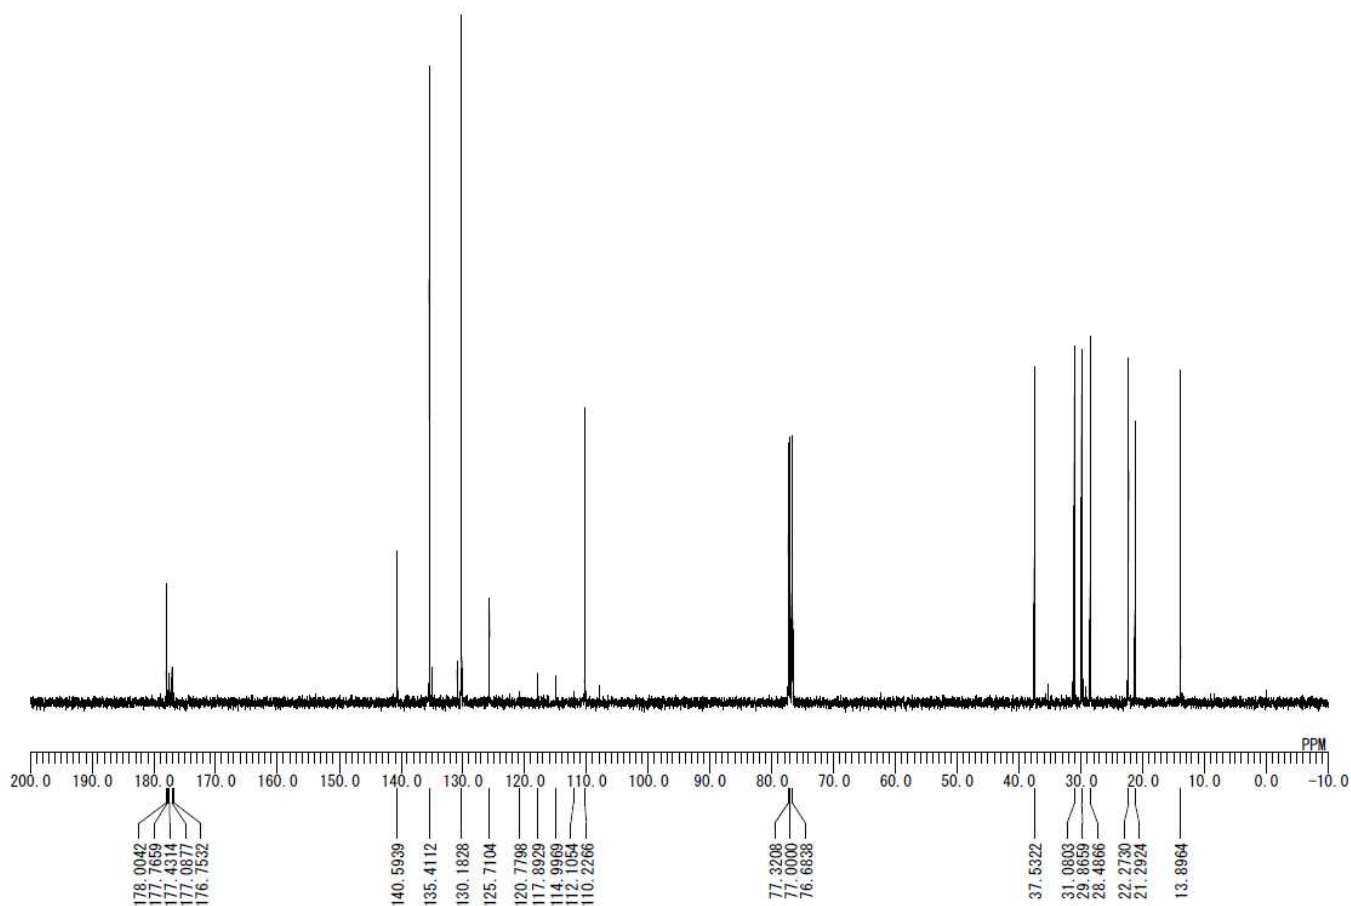

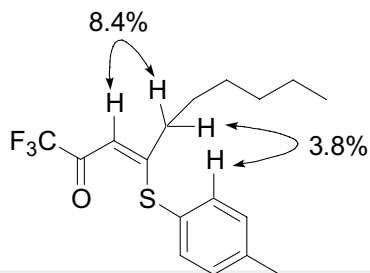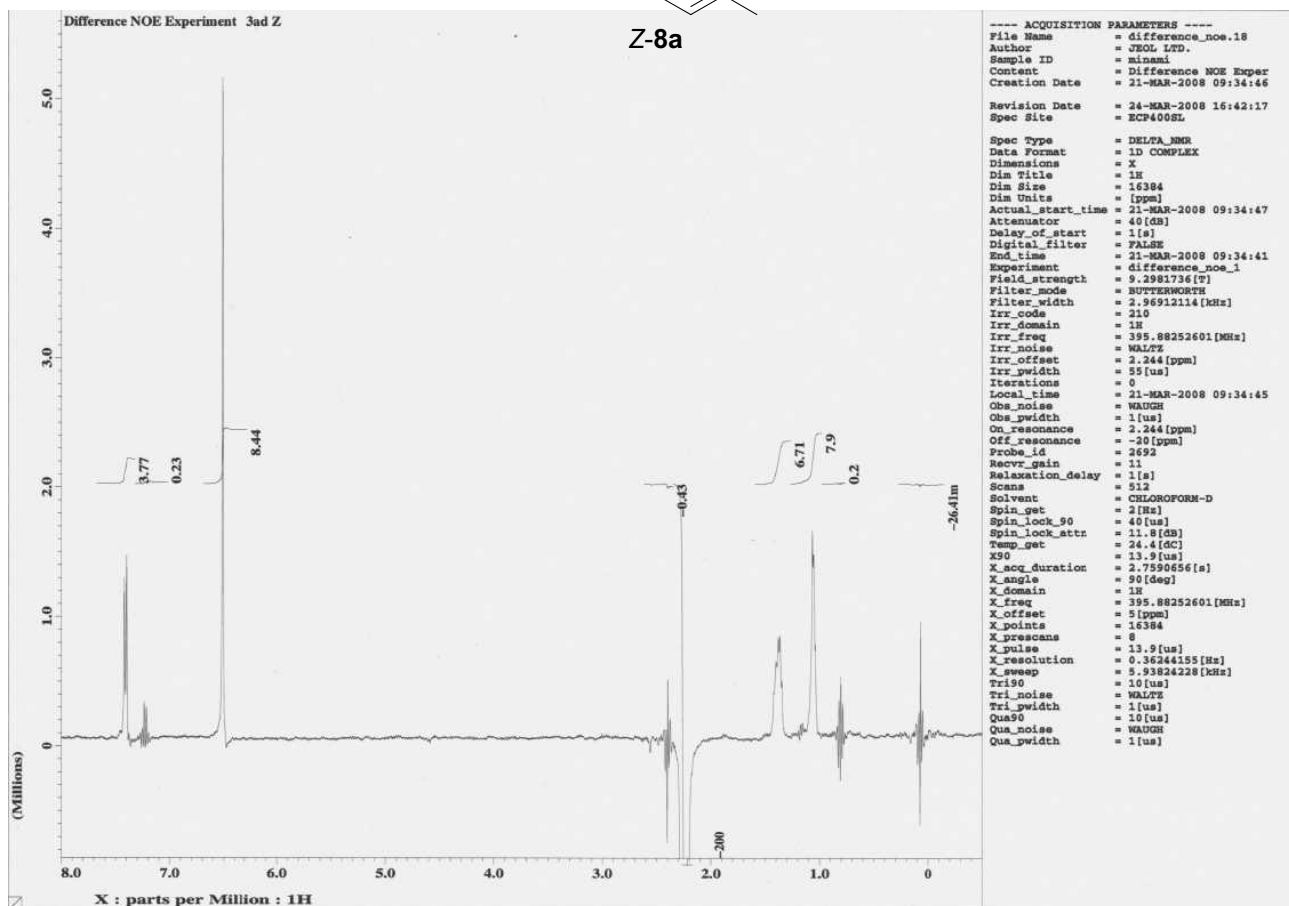



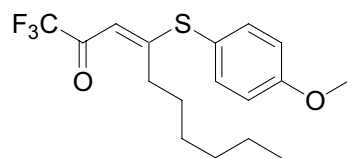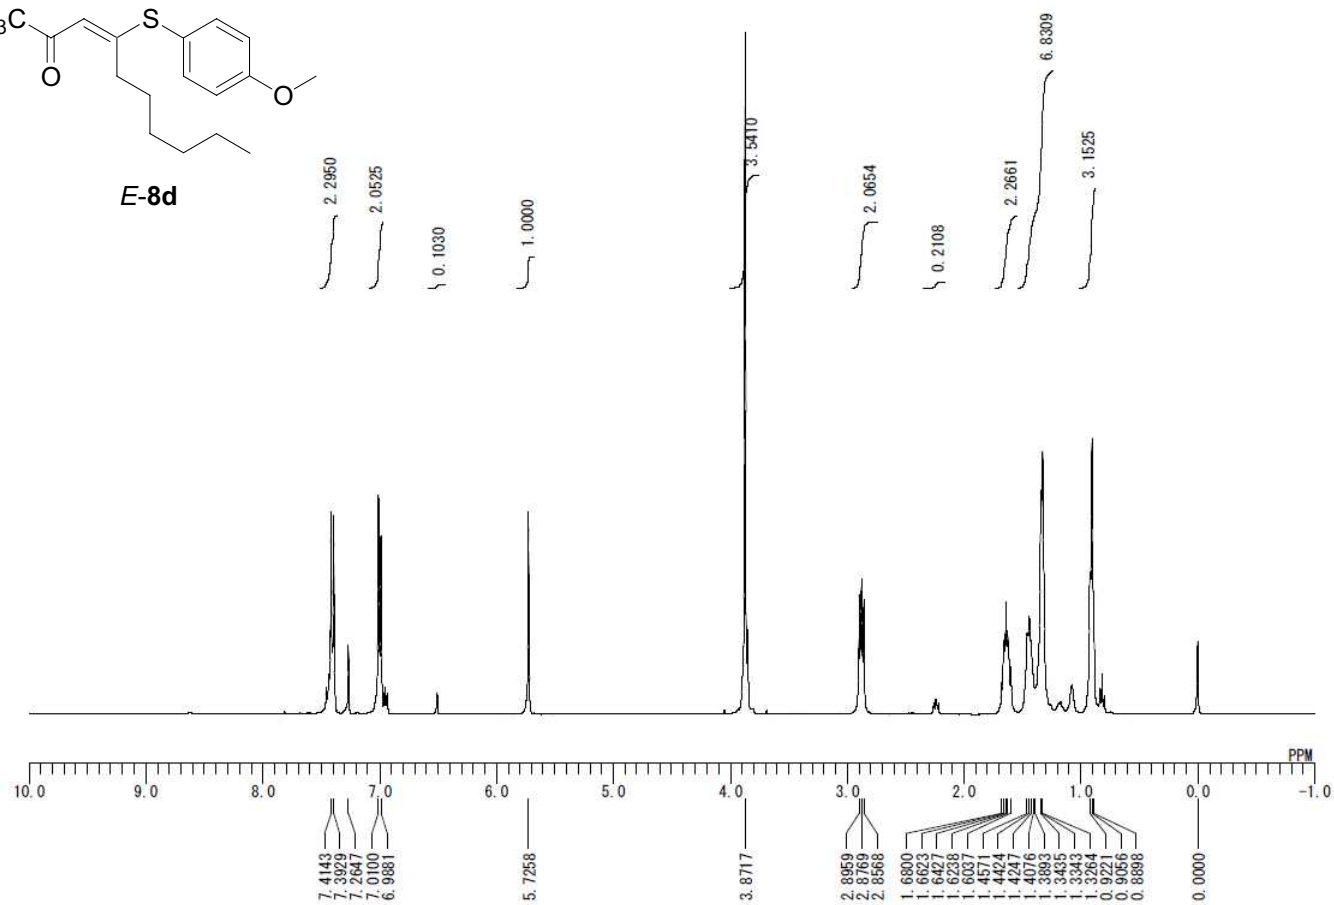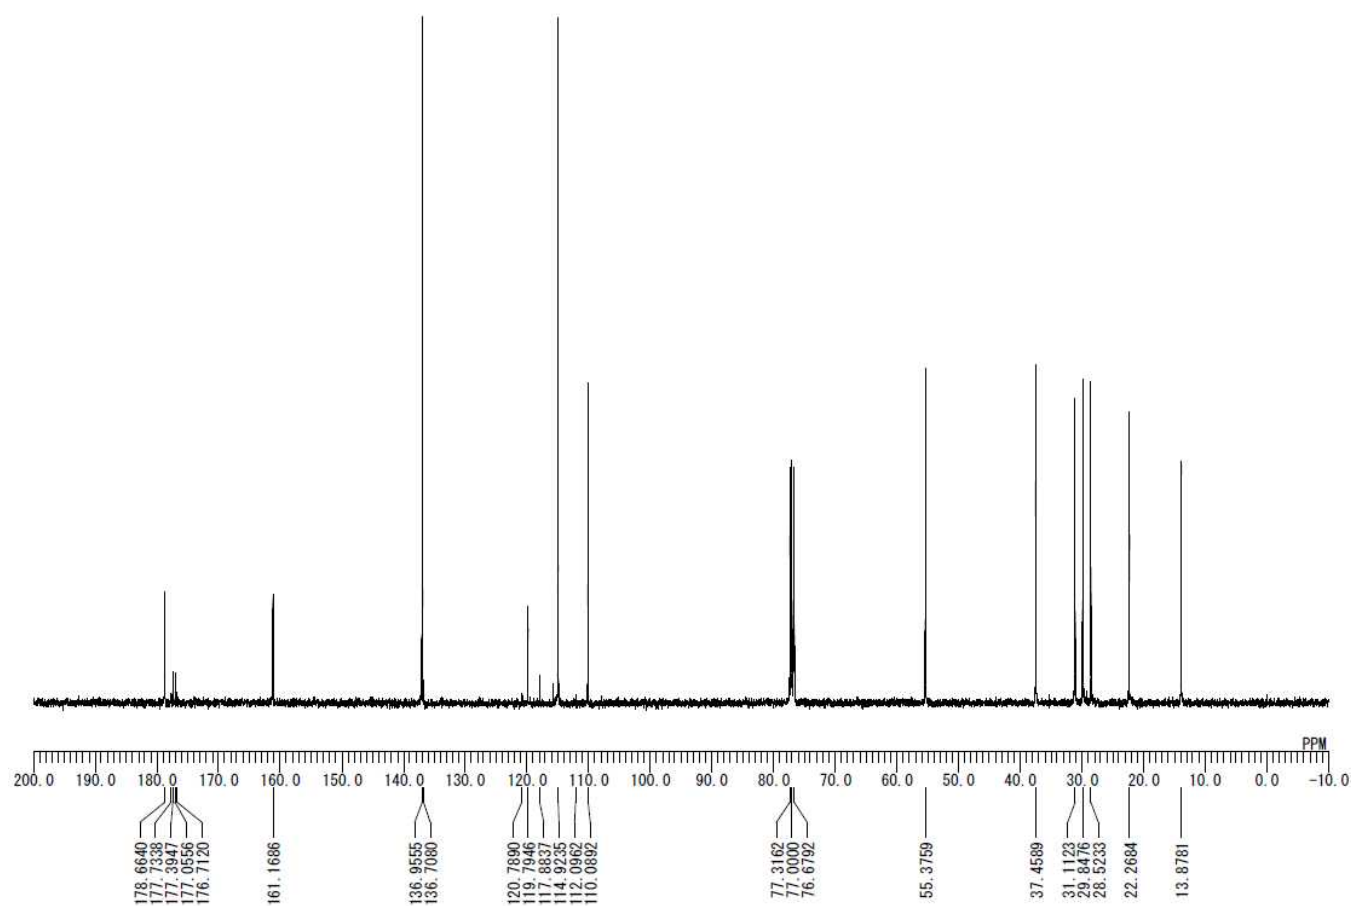

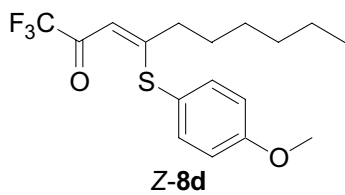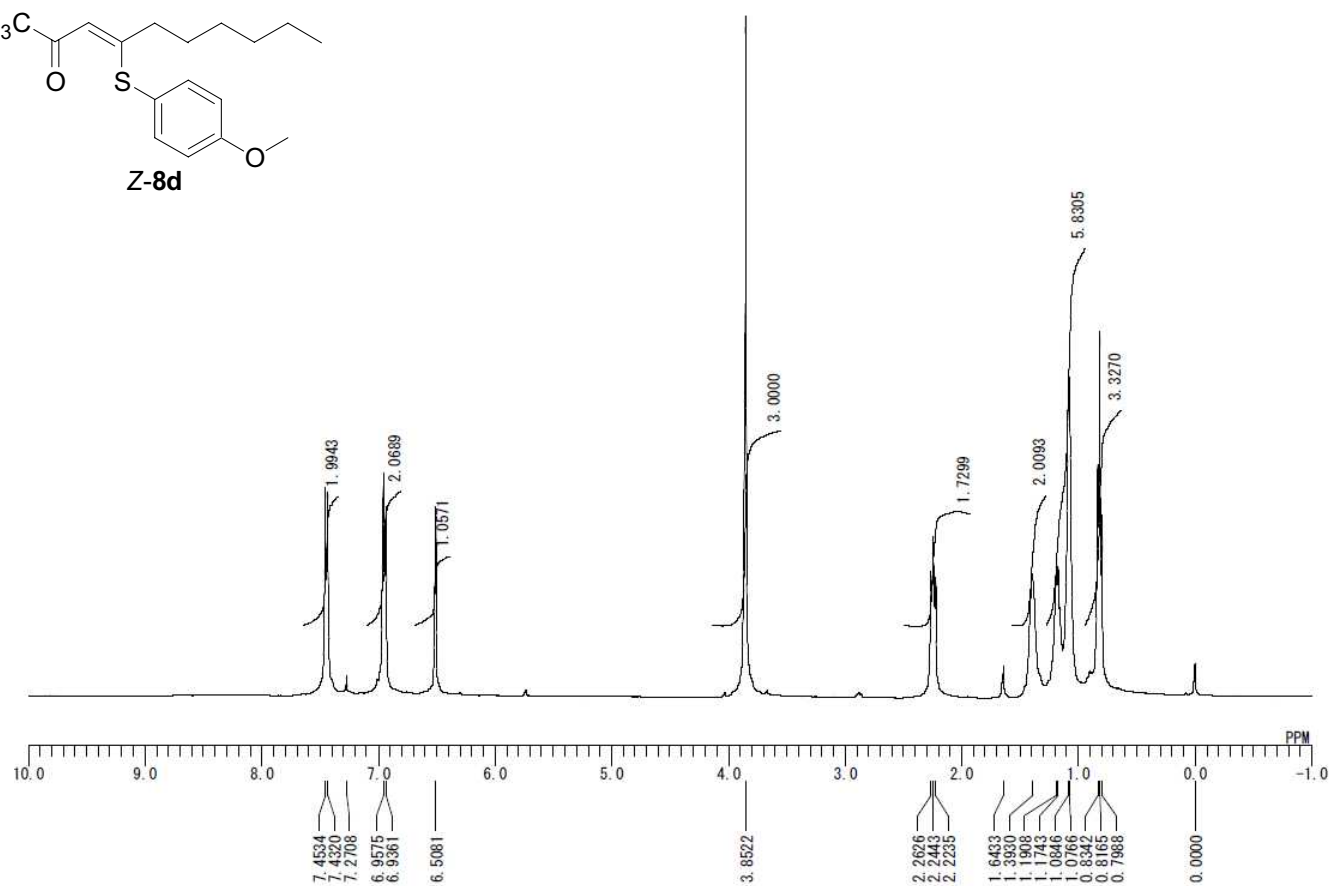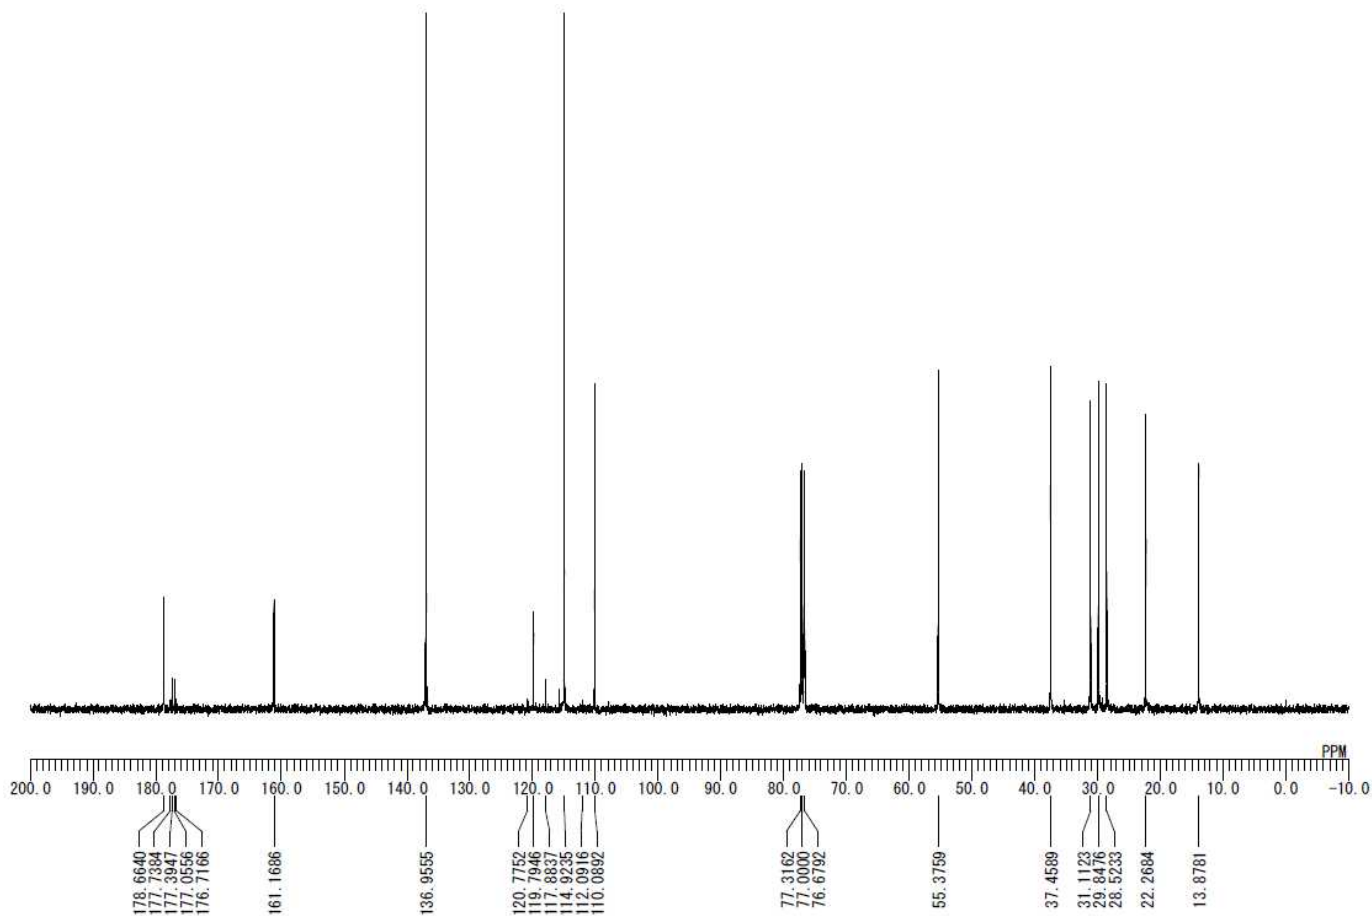

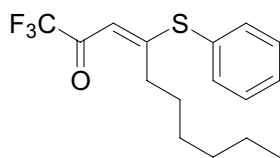

*E*-8e

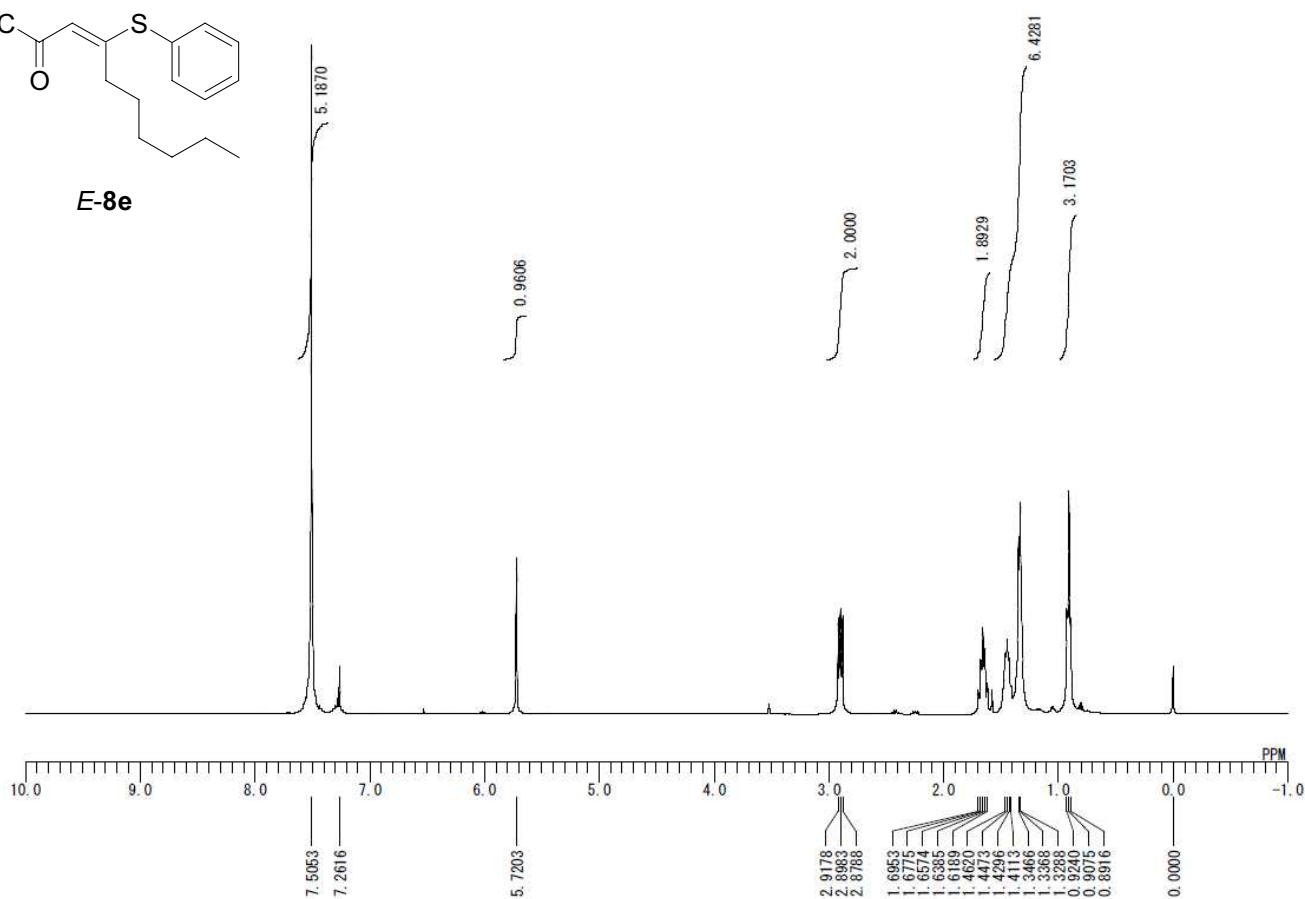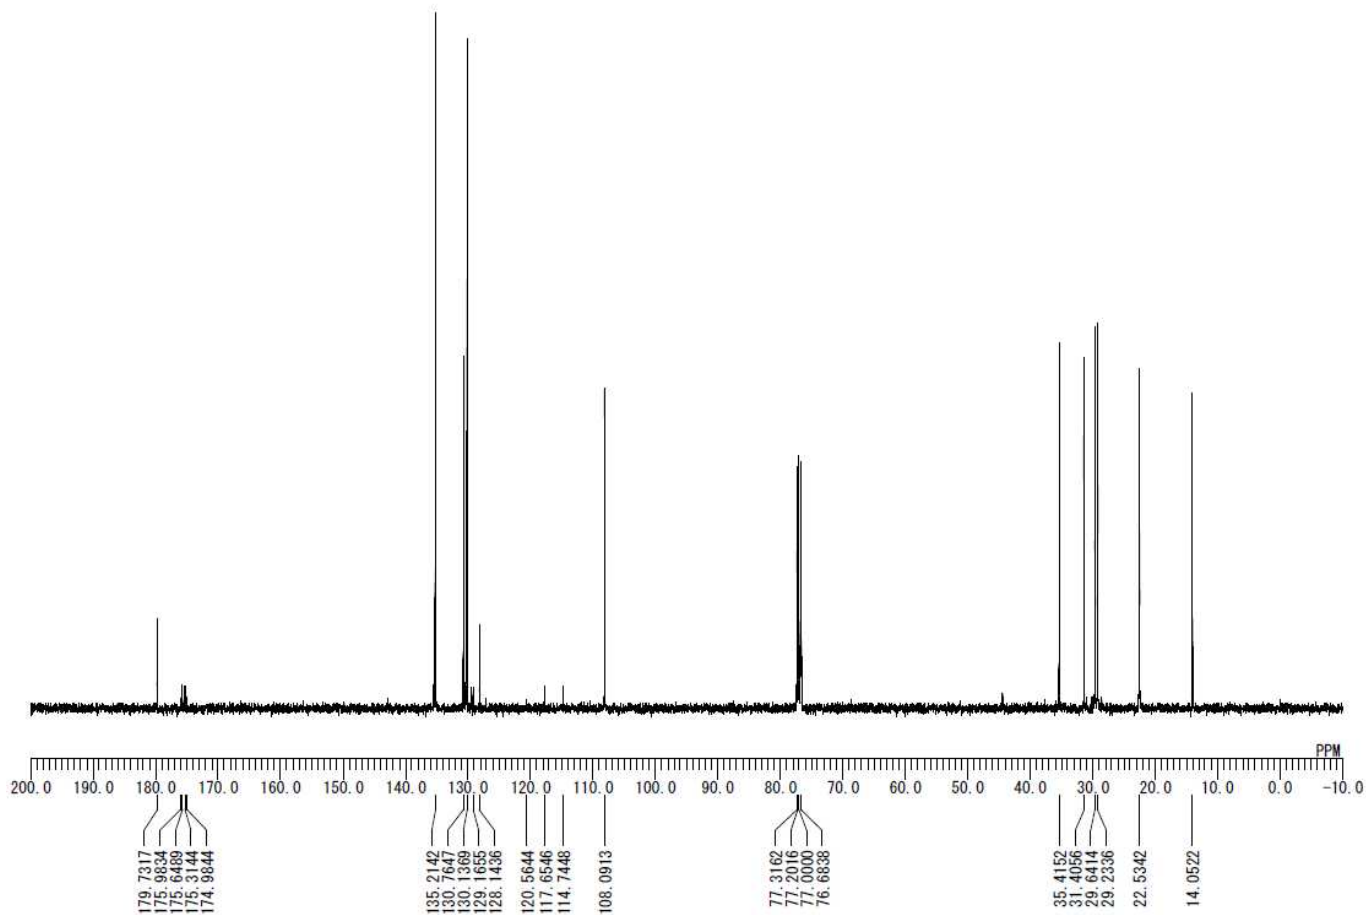

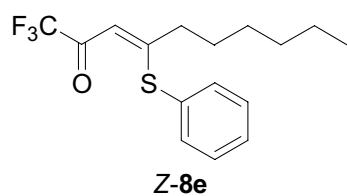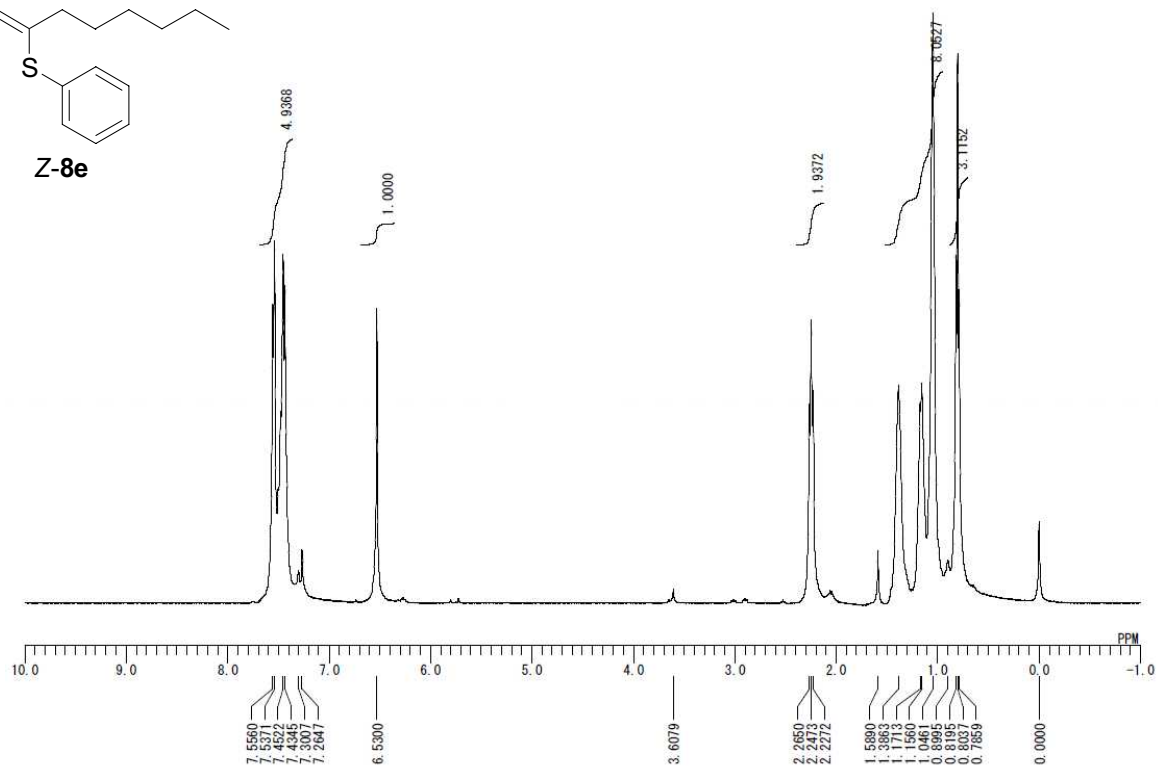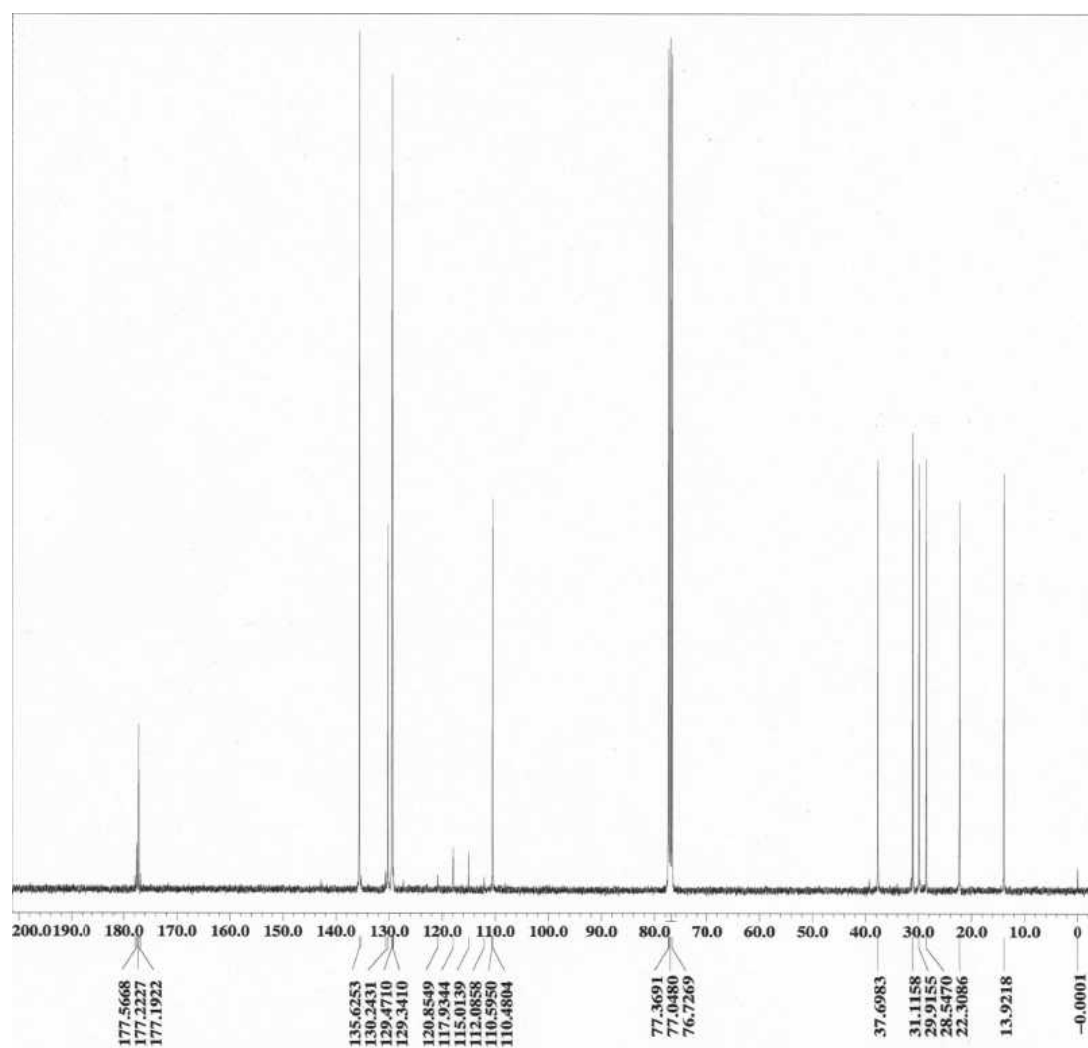

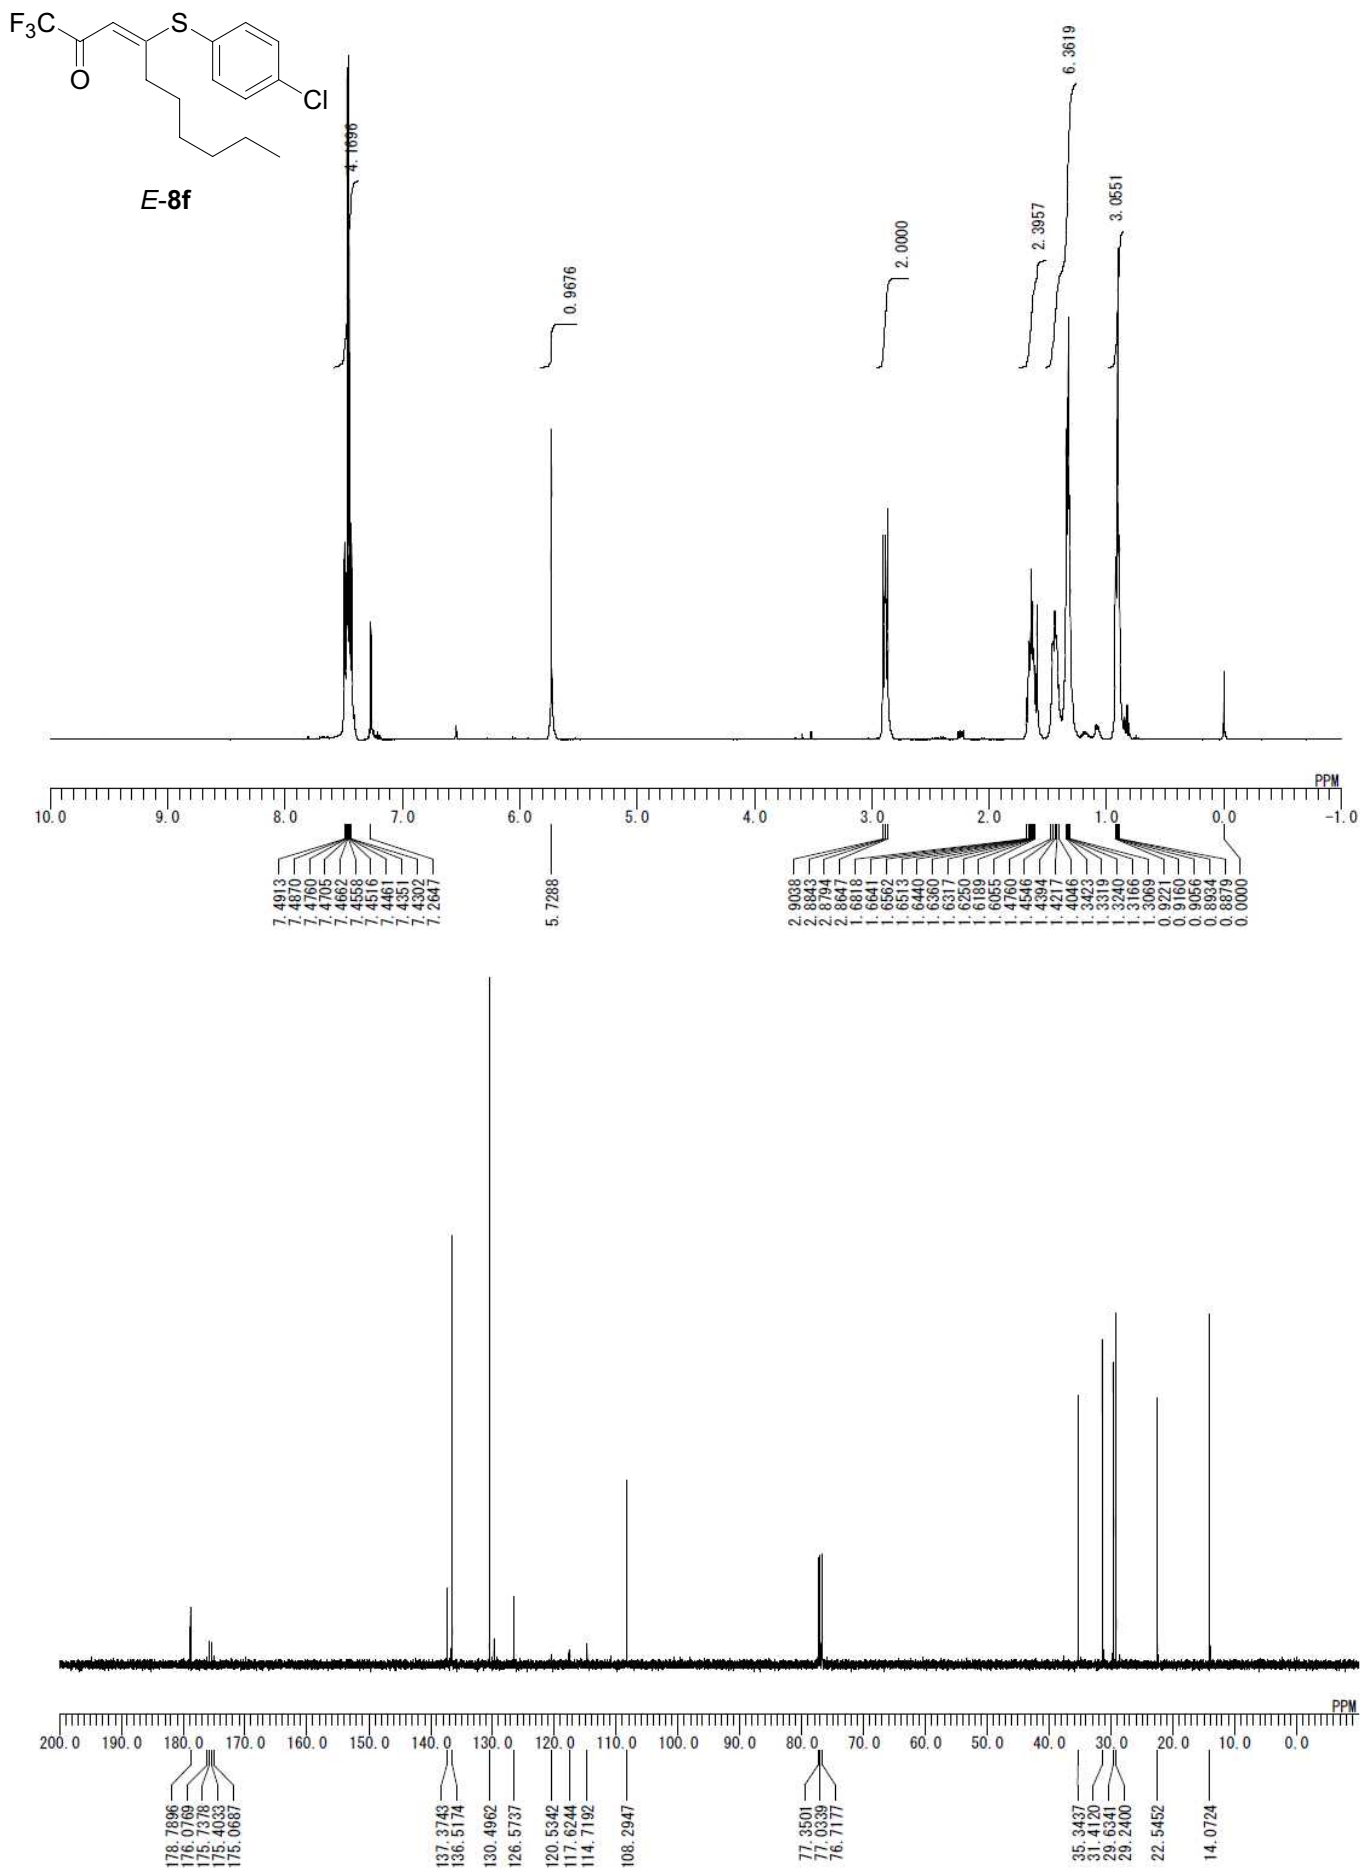

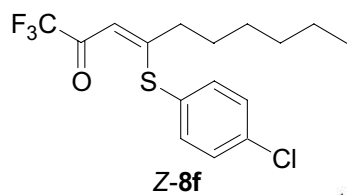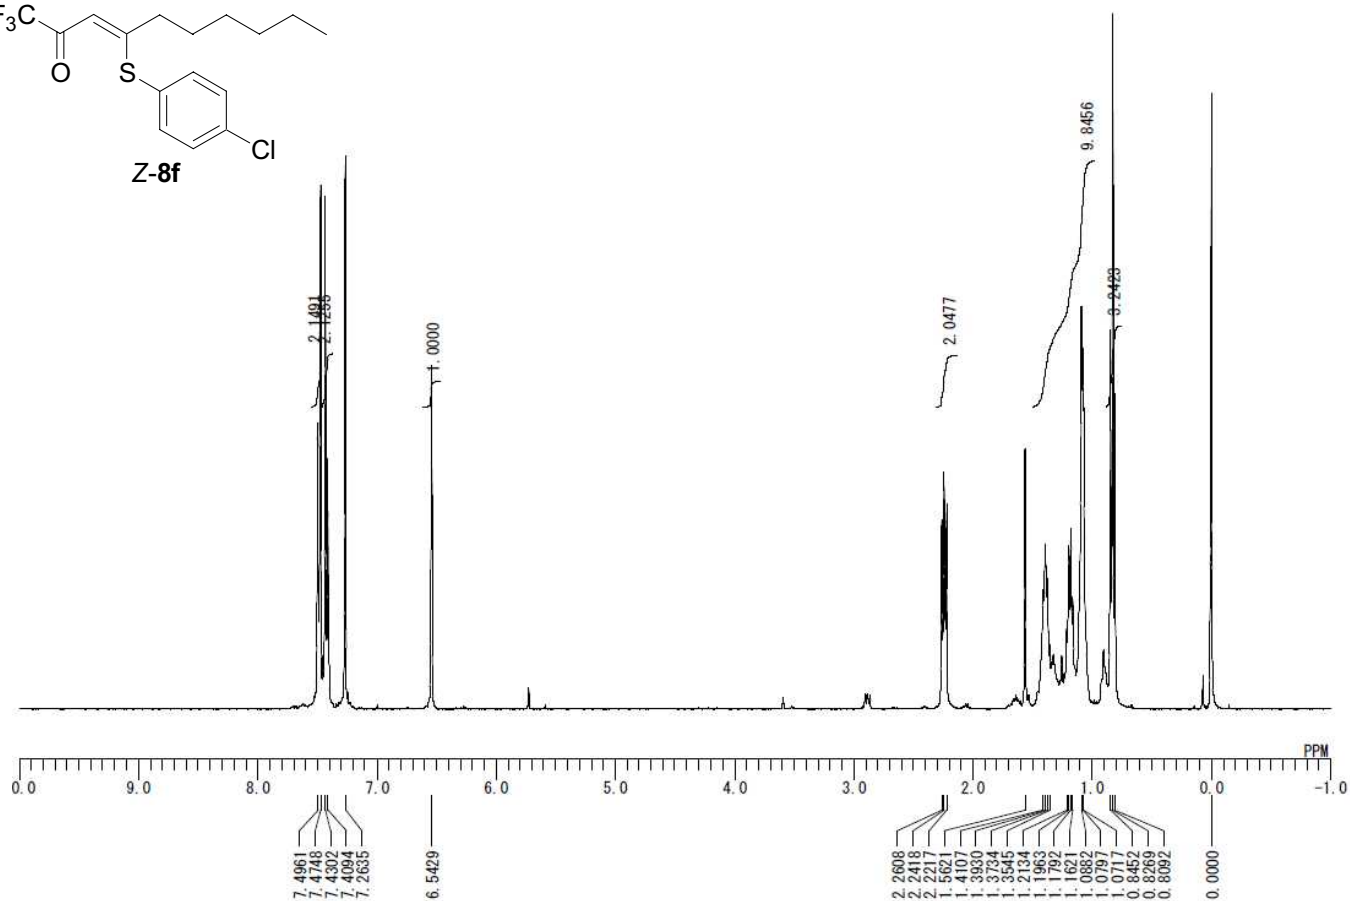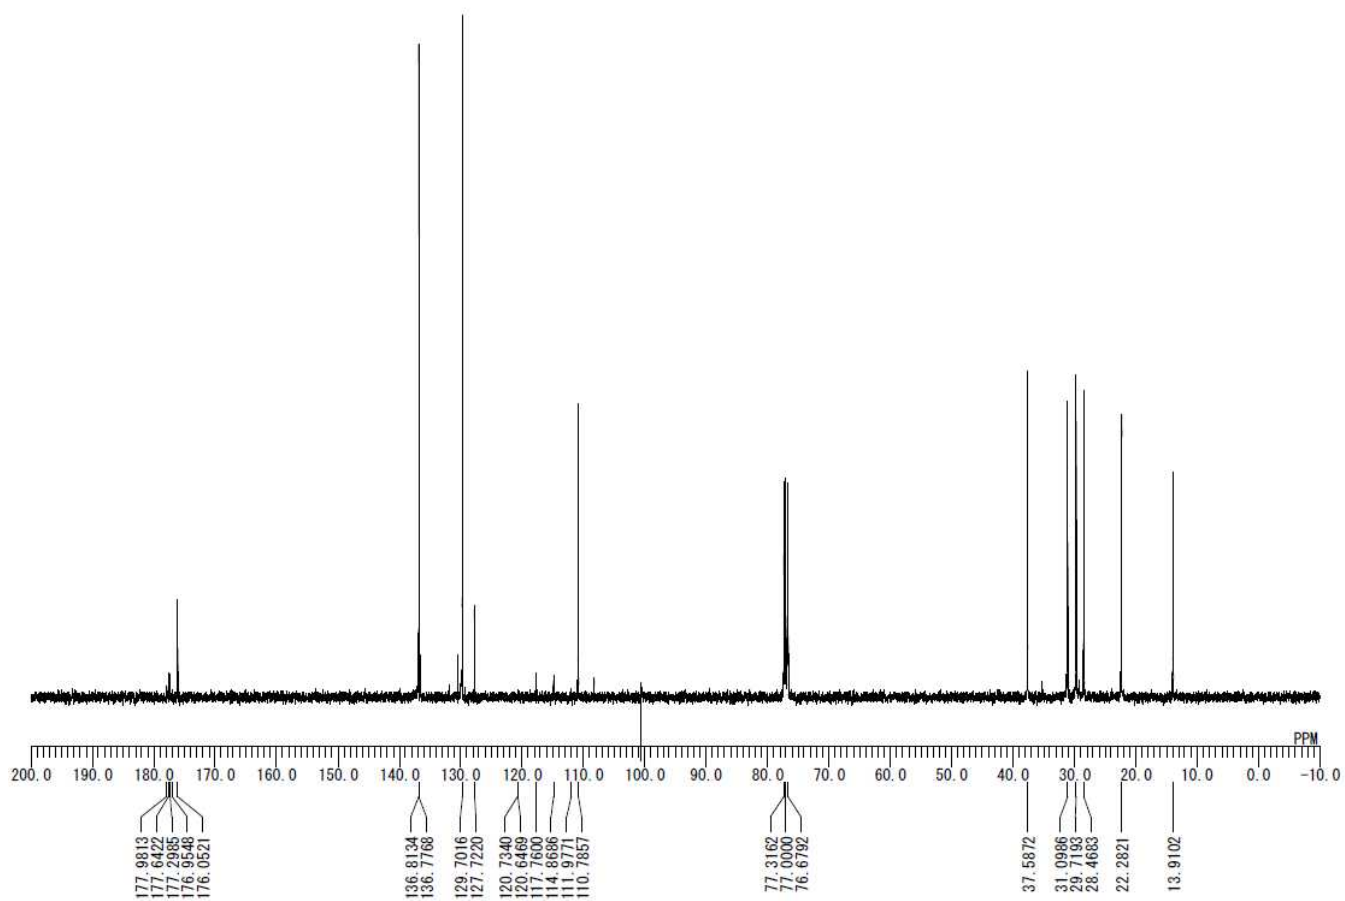

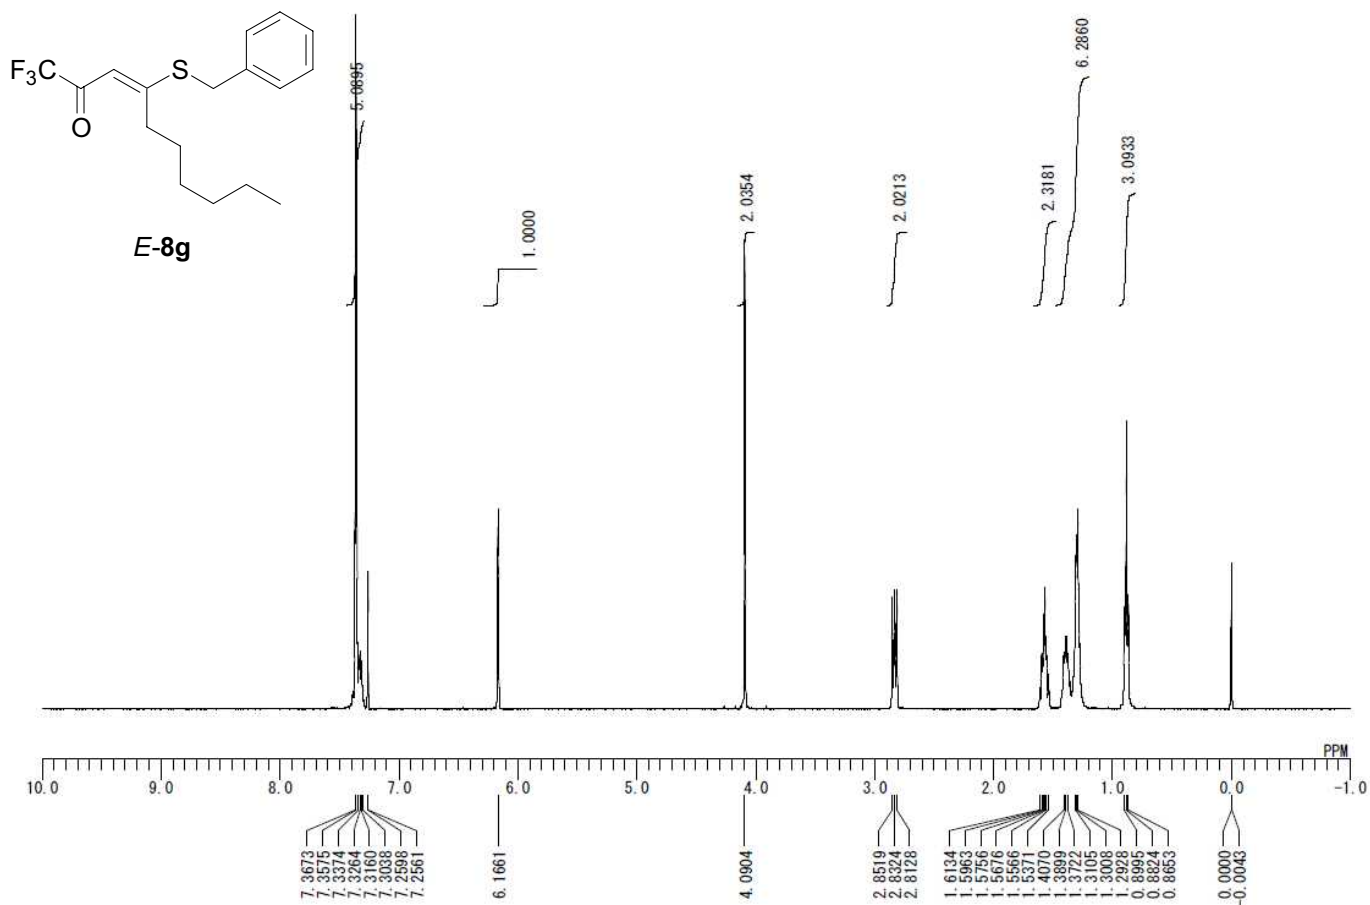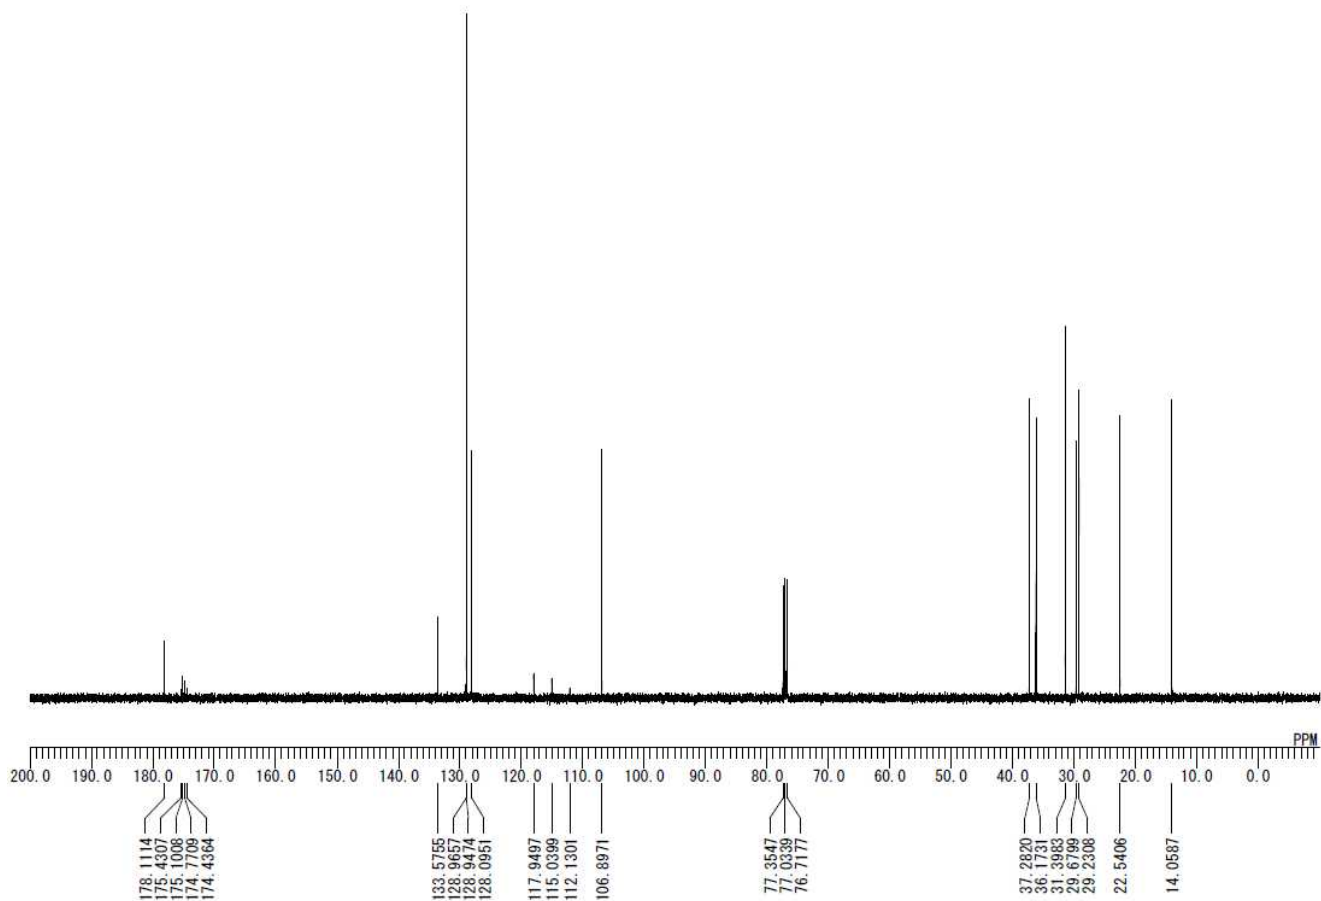

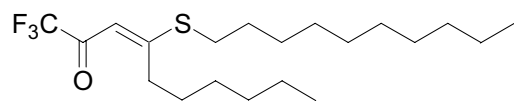

*E*-8h

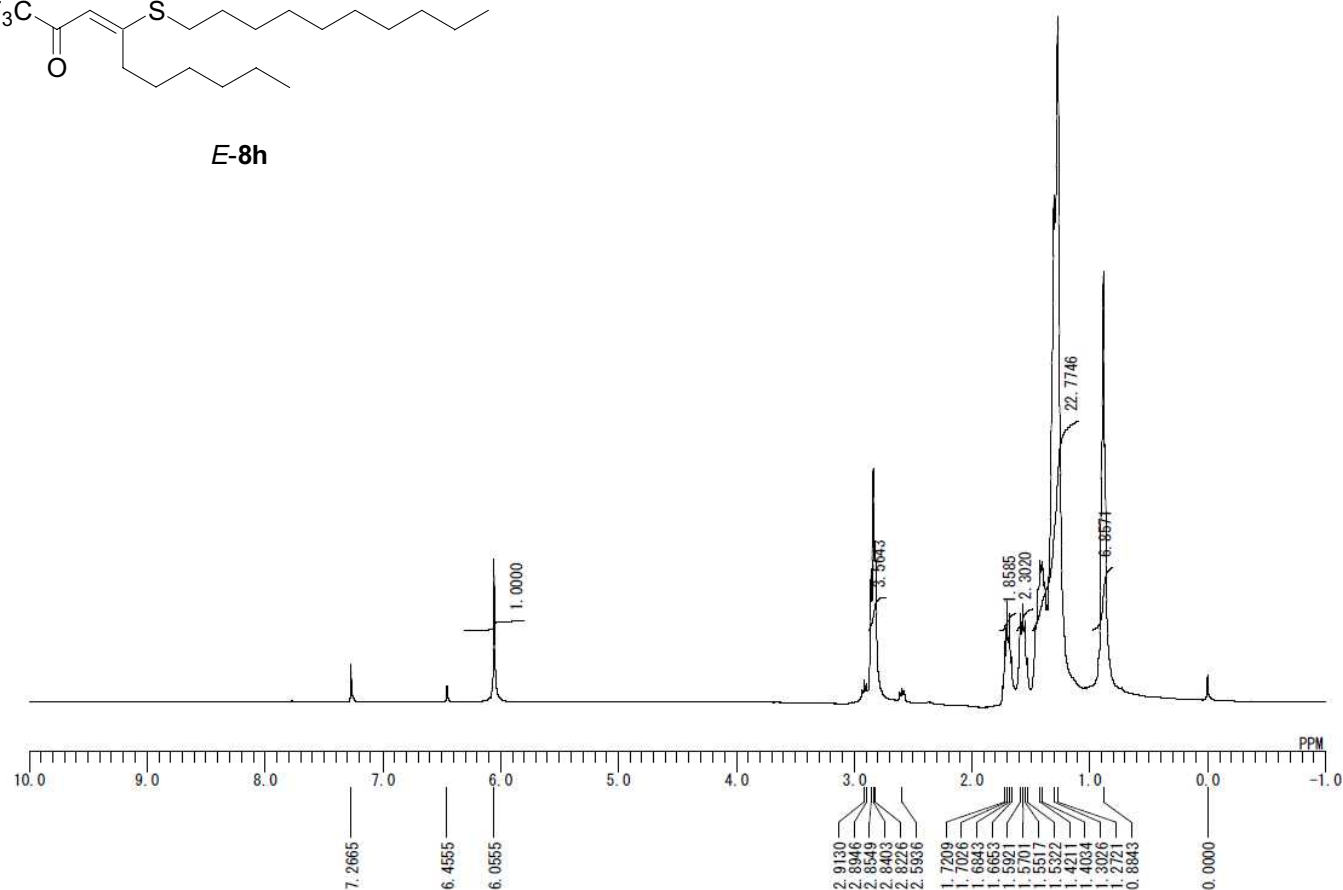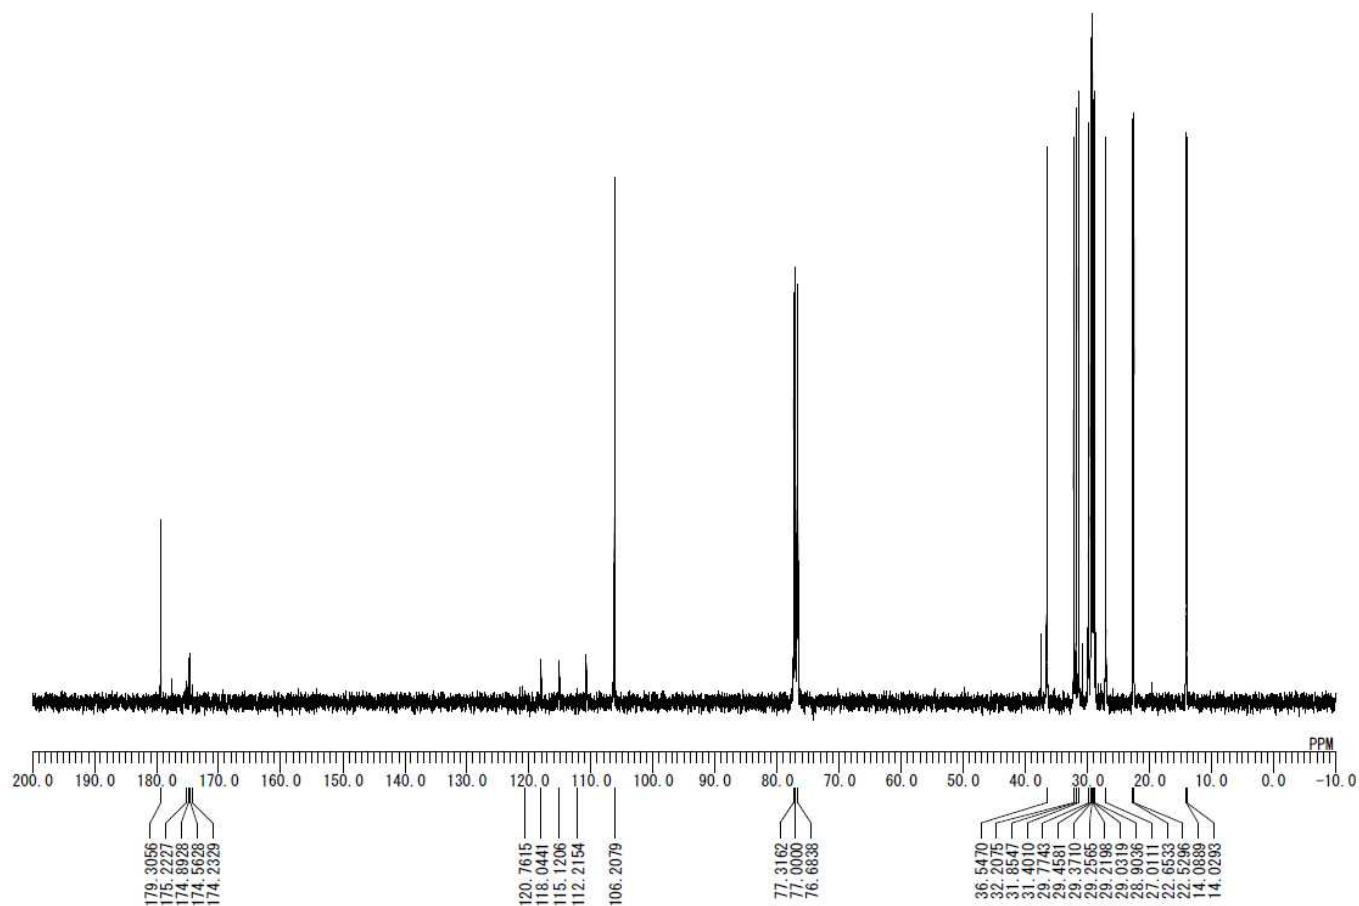



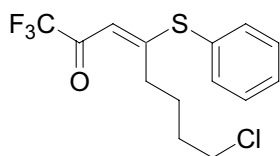

*E*-8i

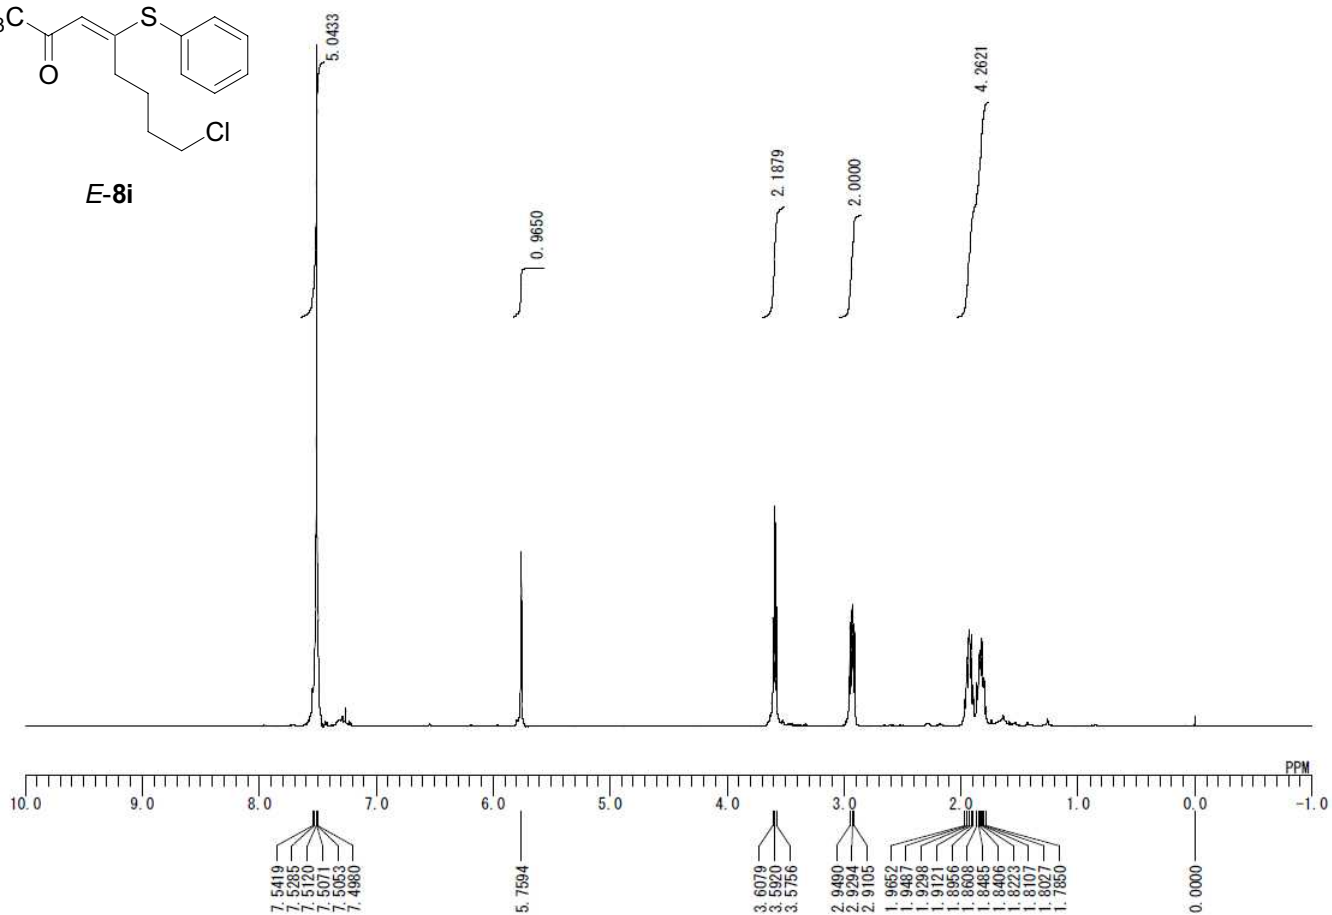

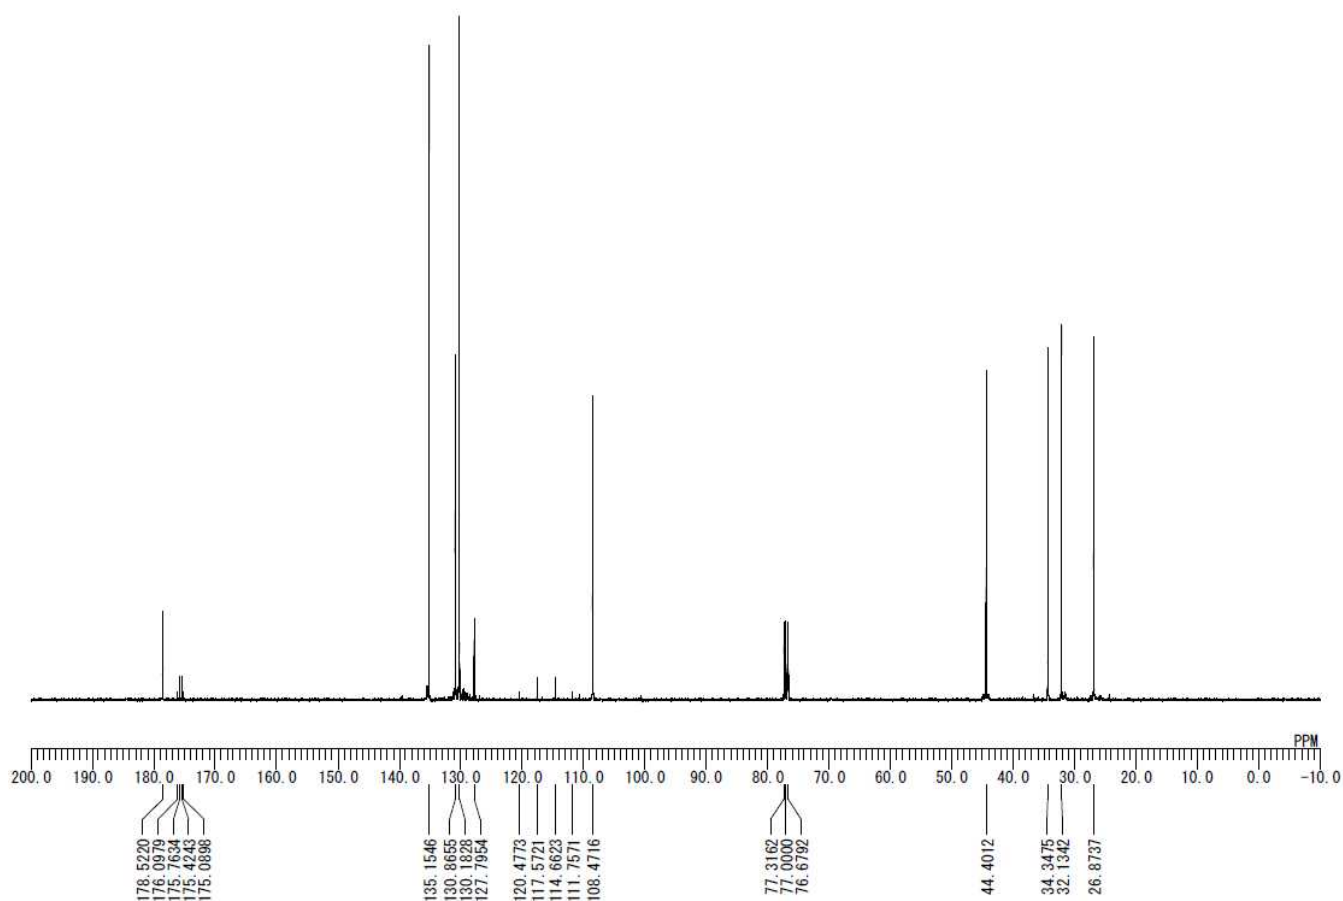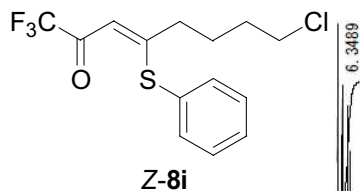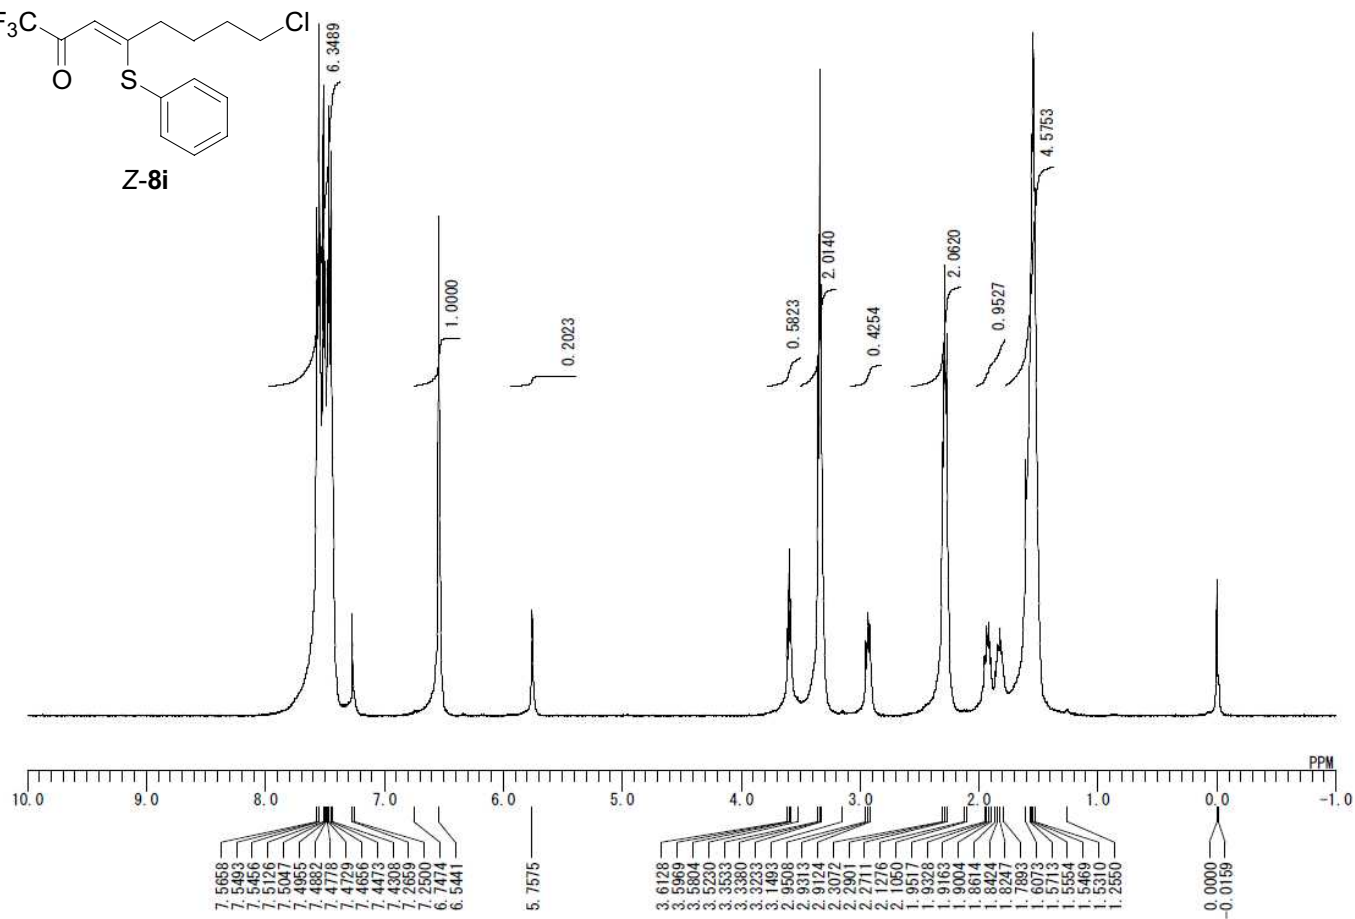

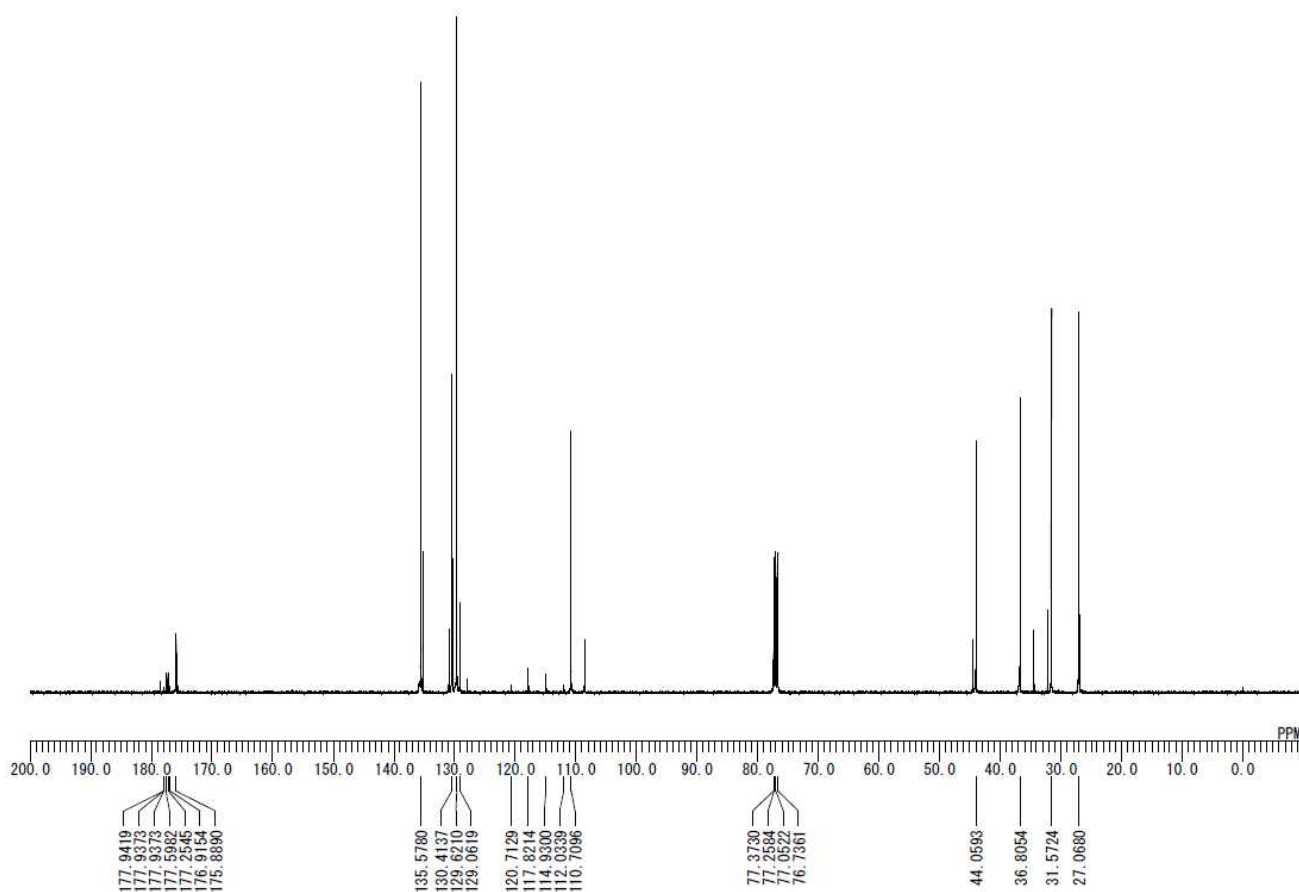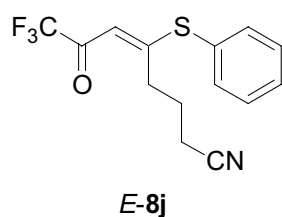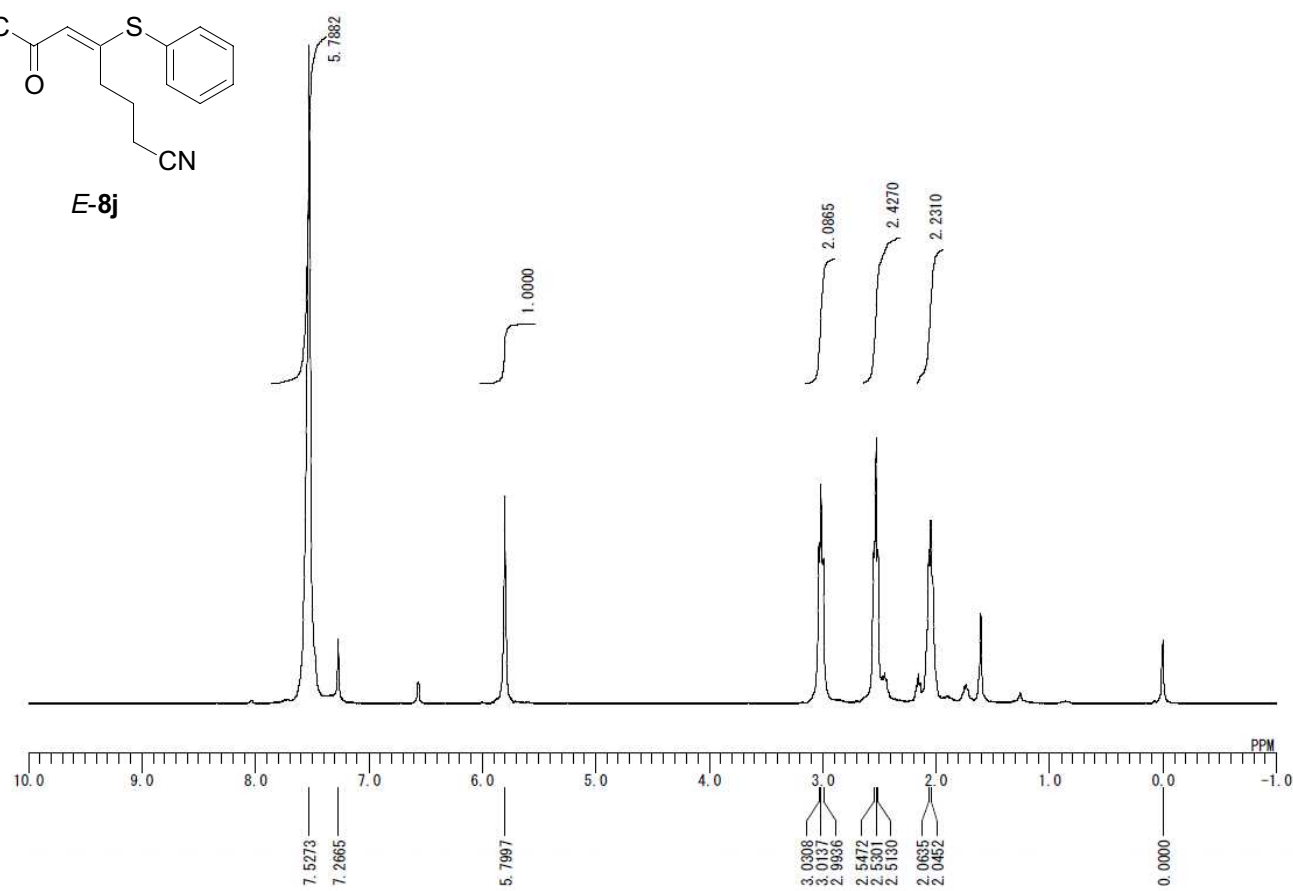

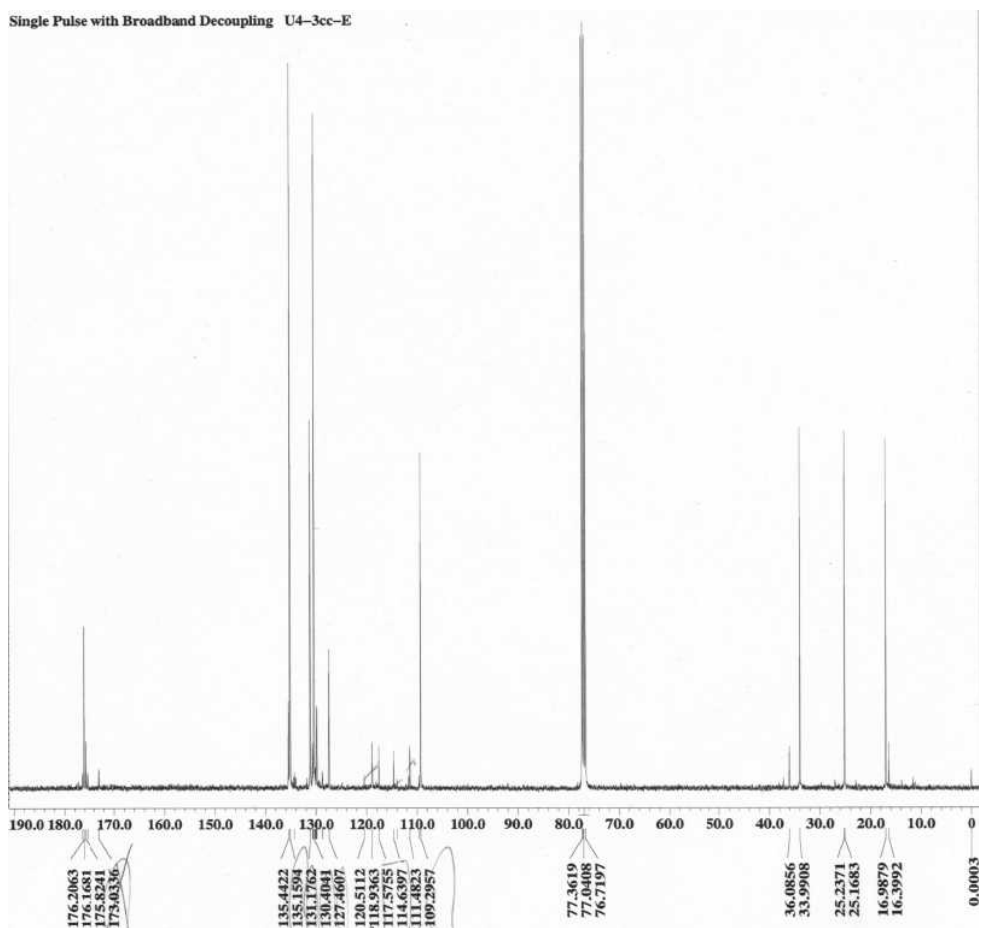

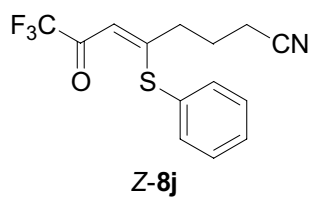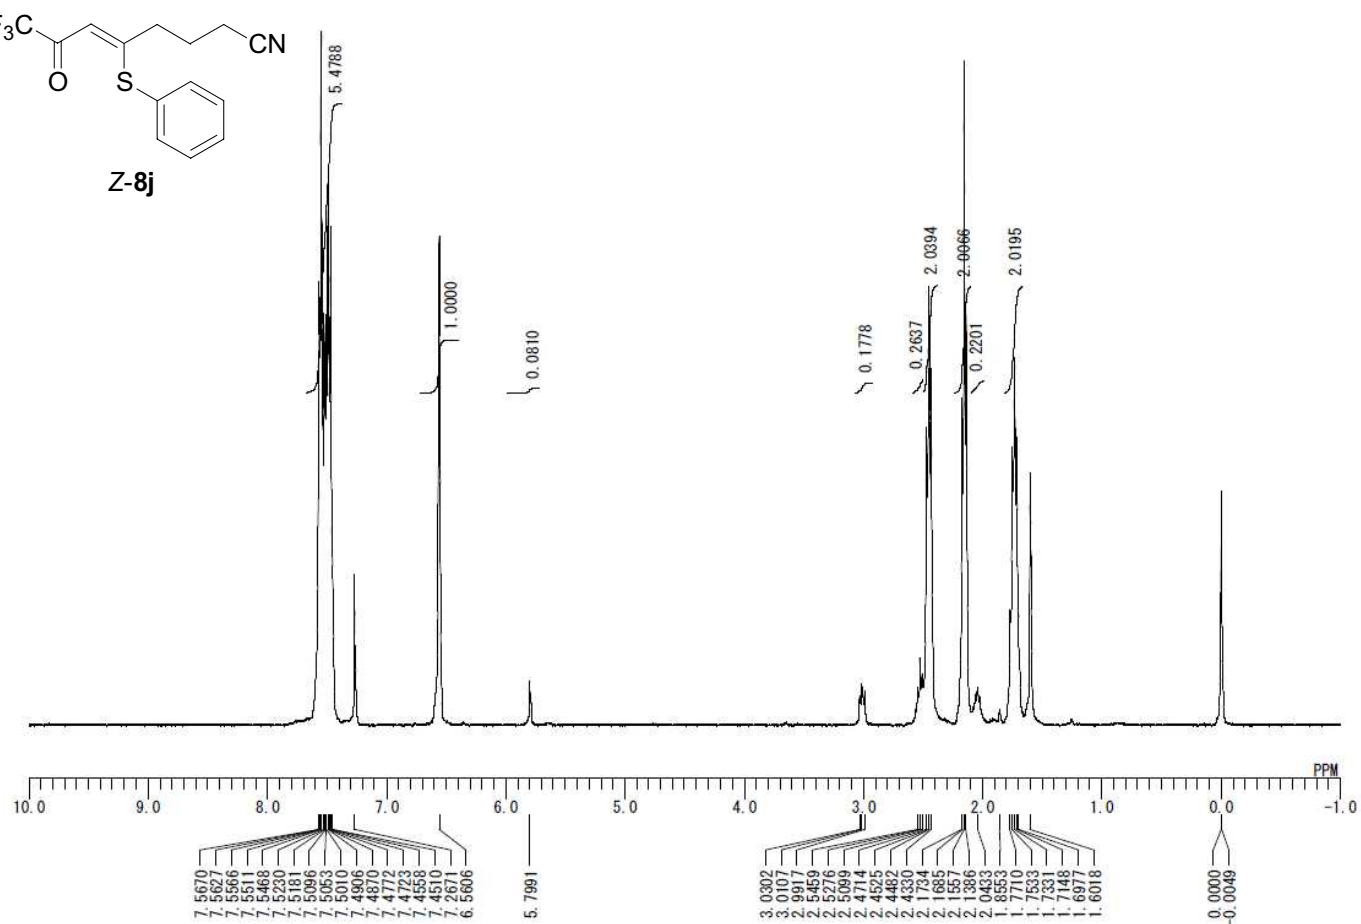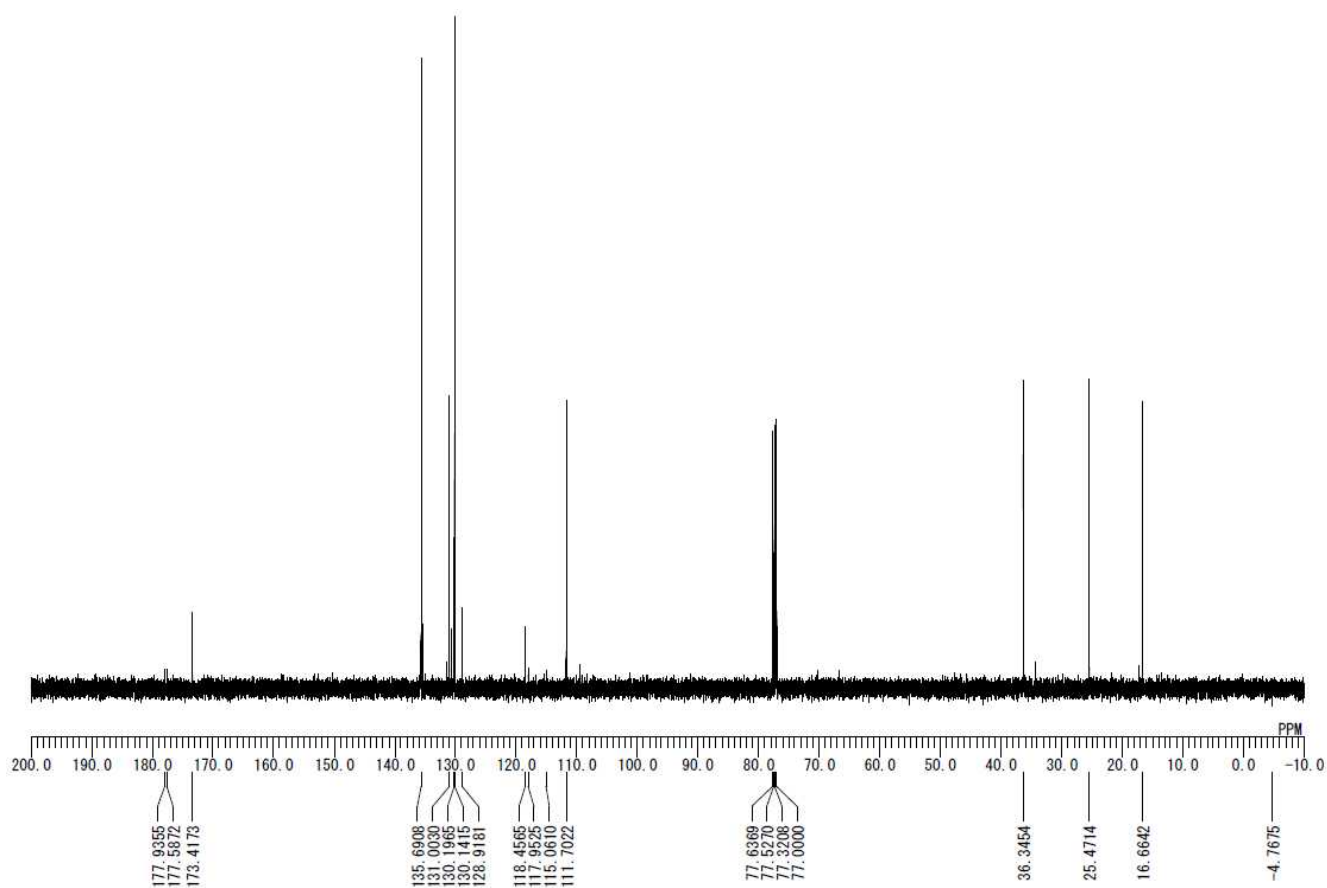

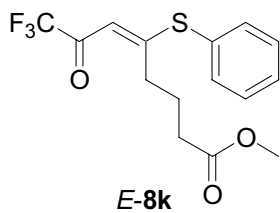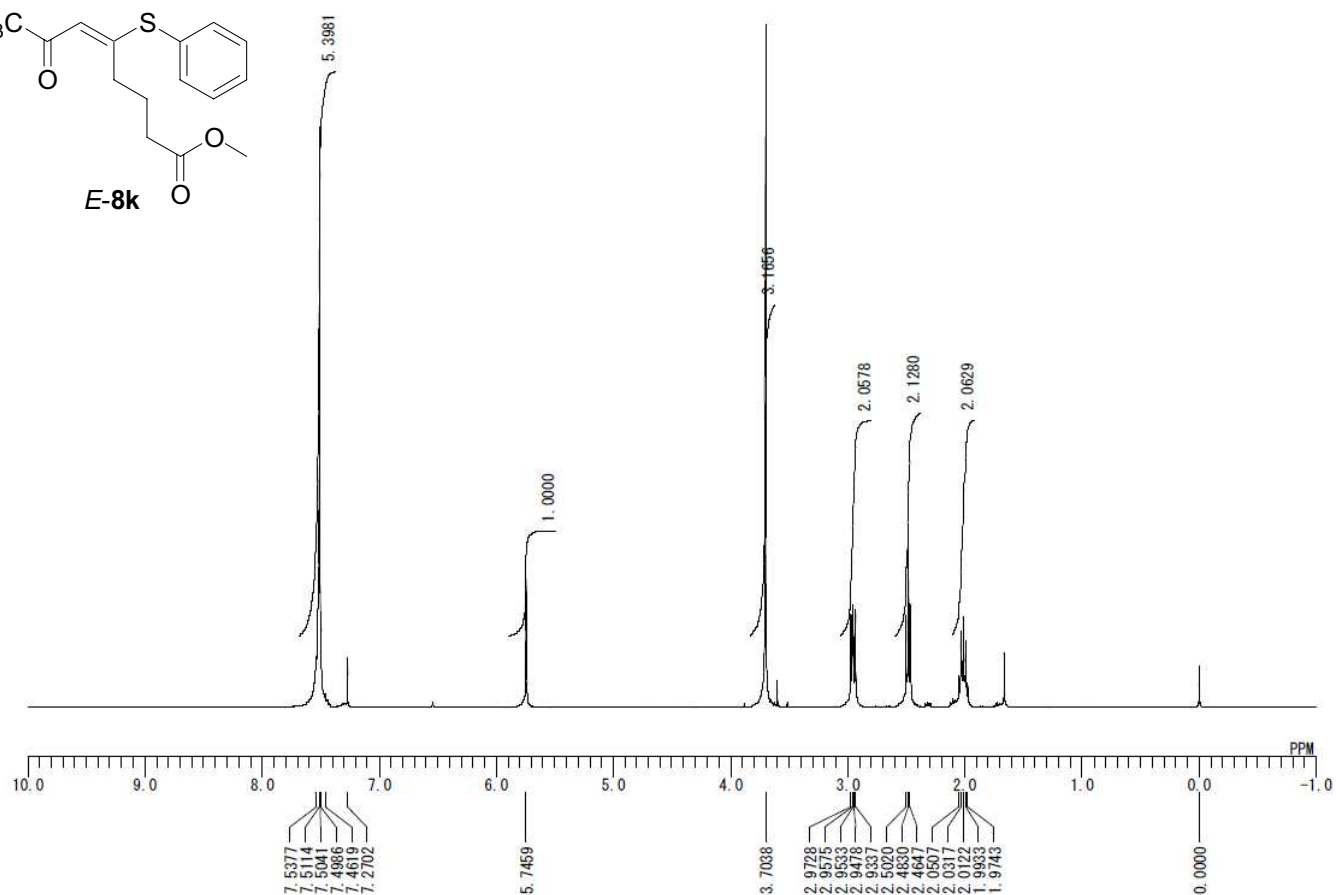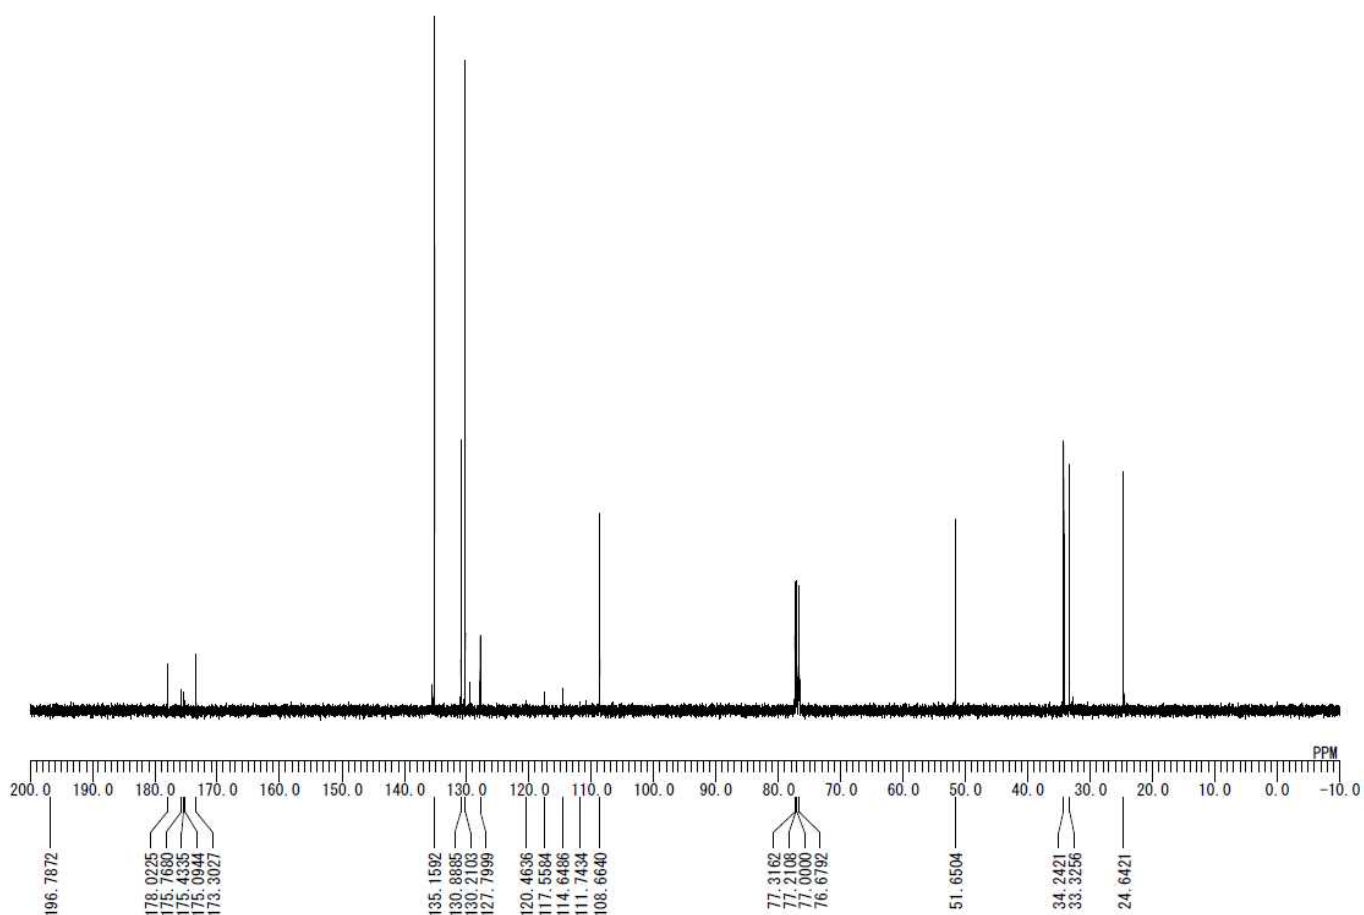

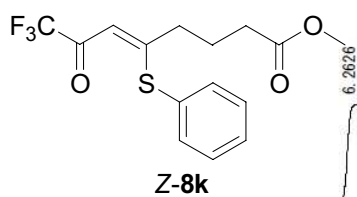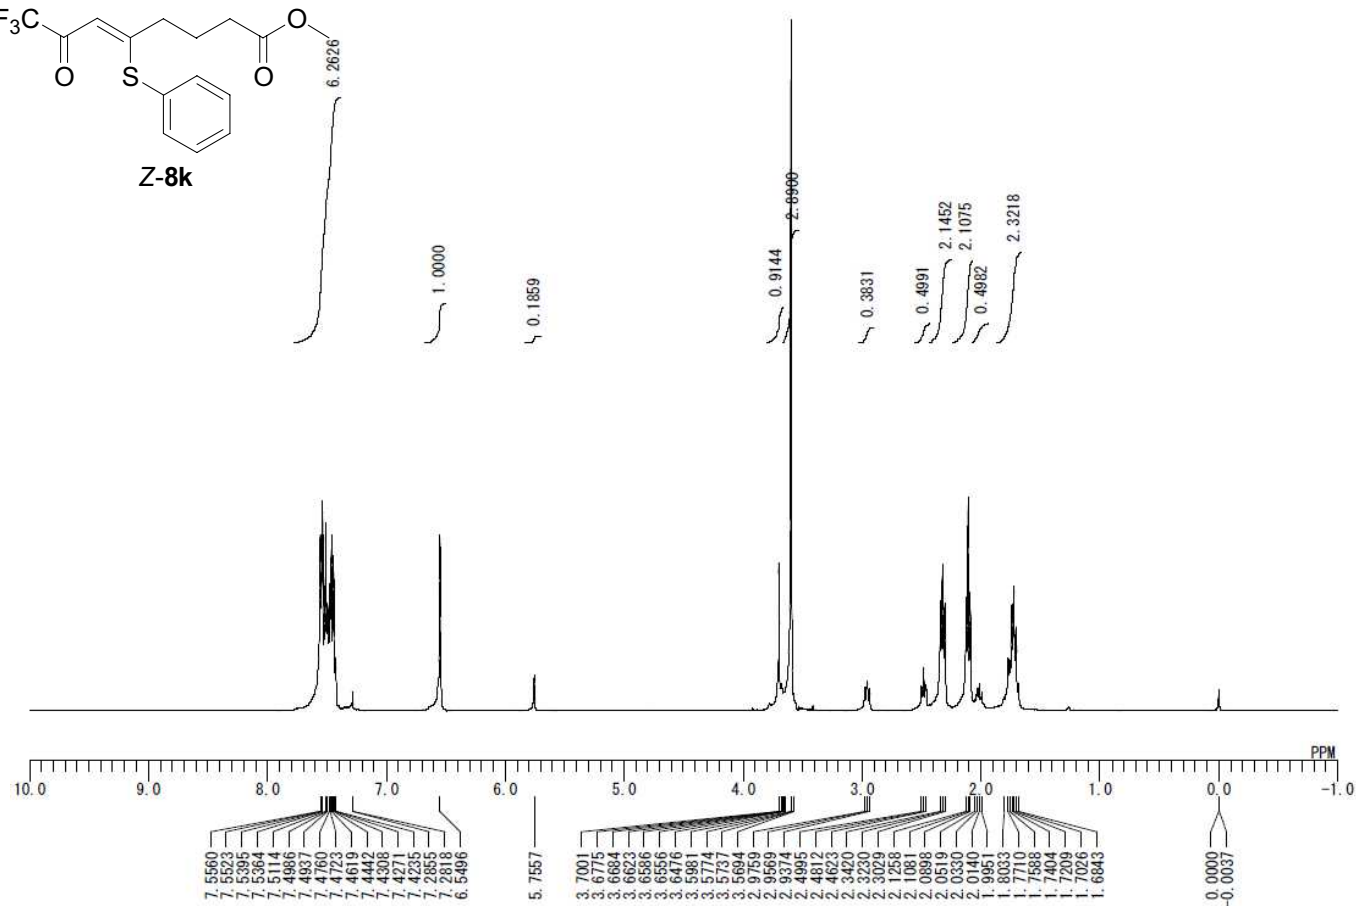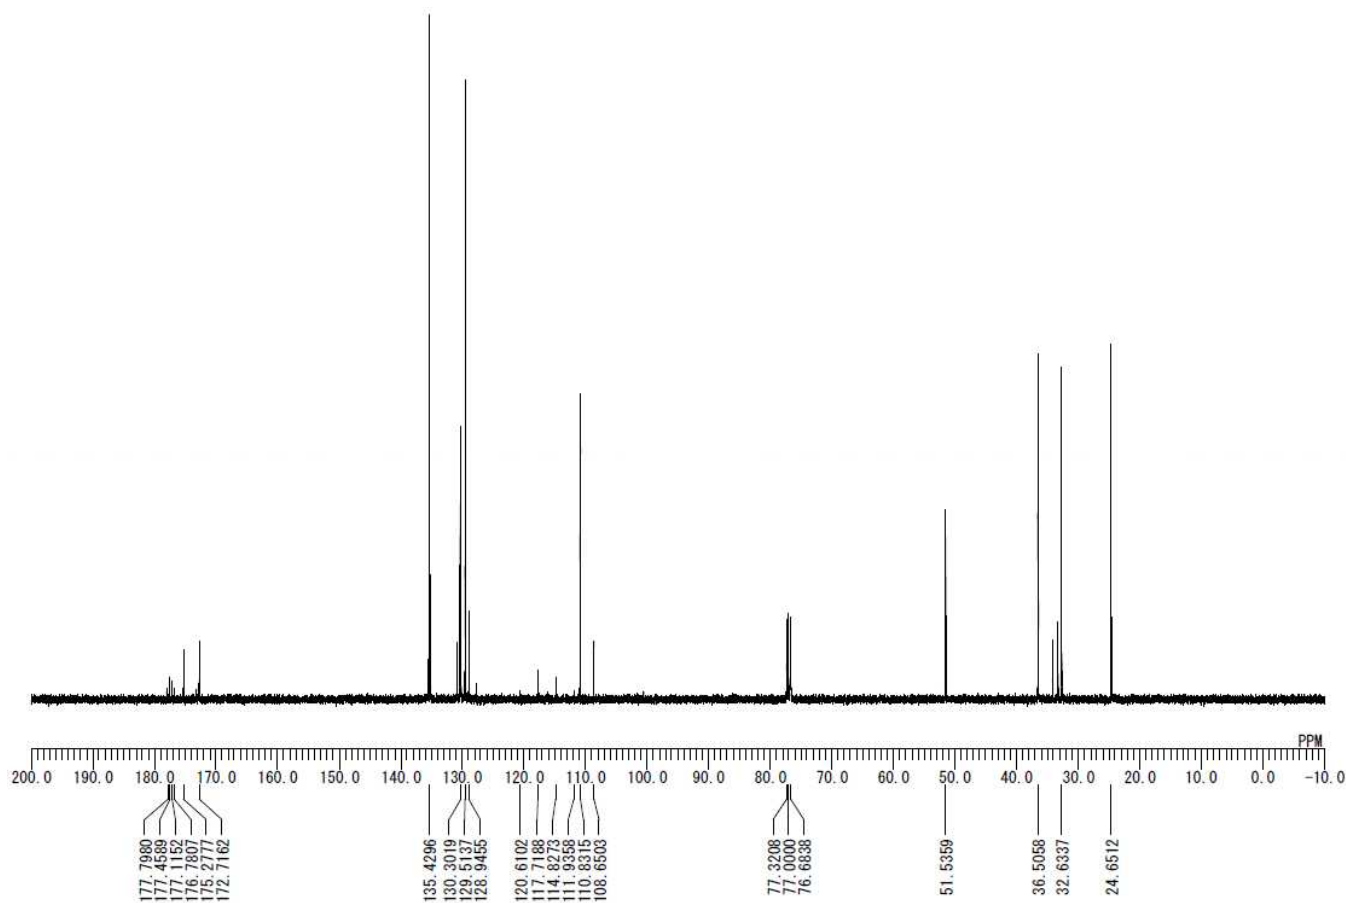

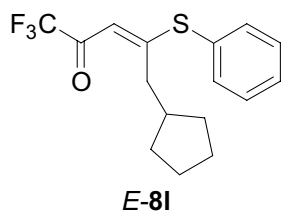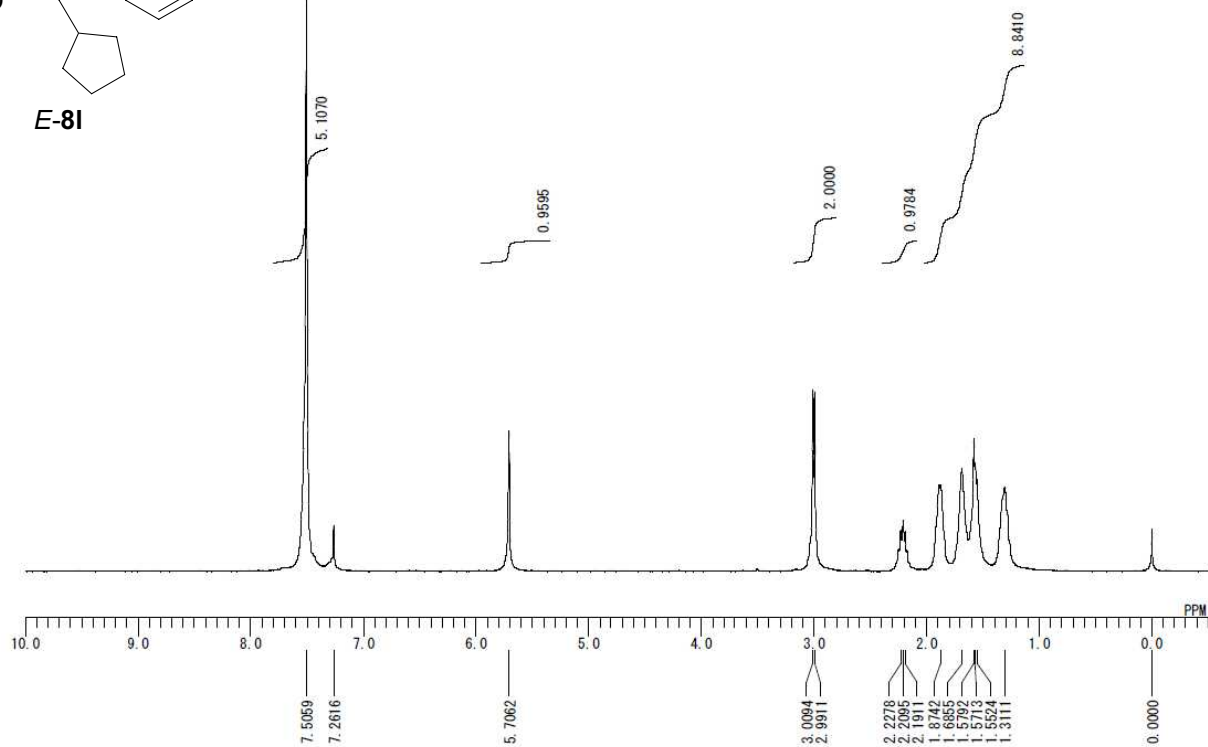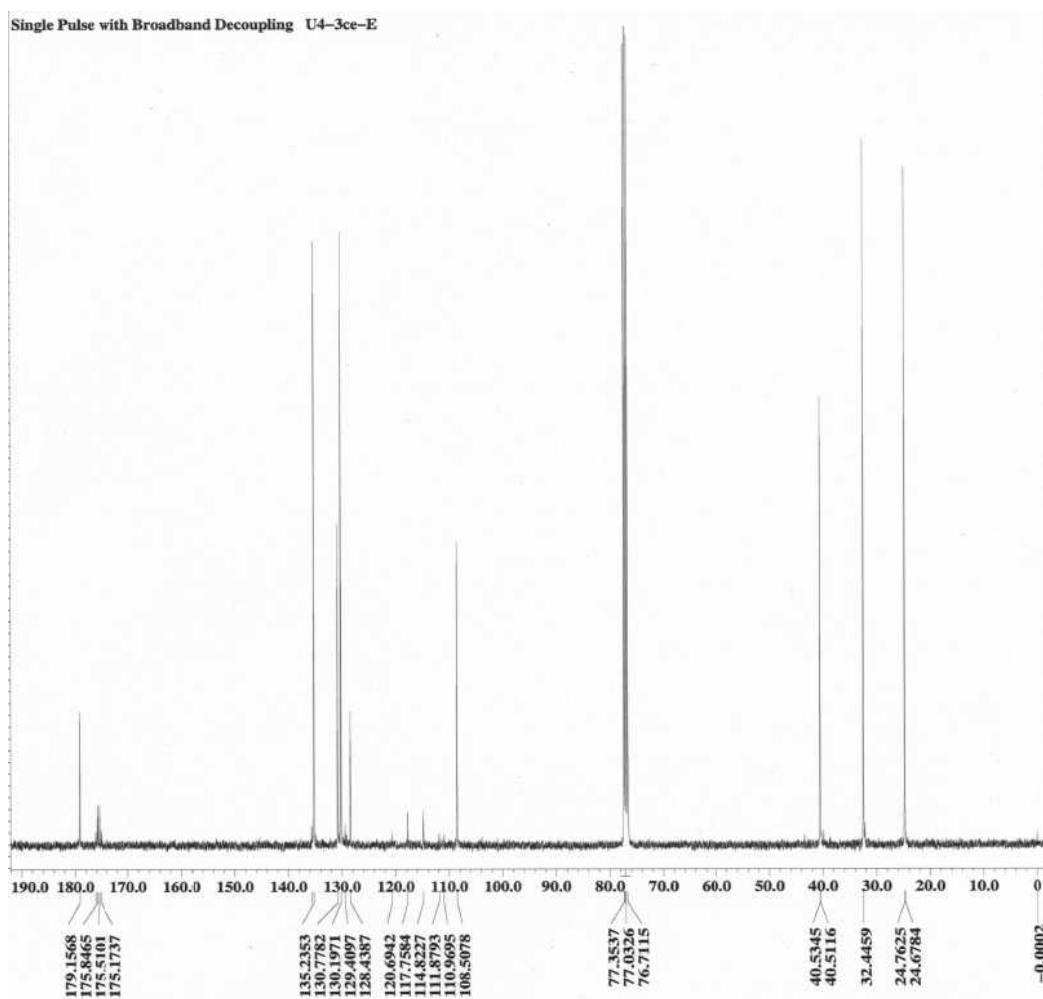



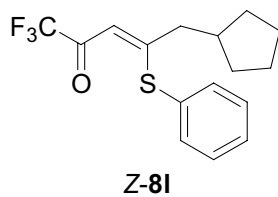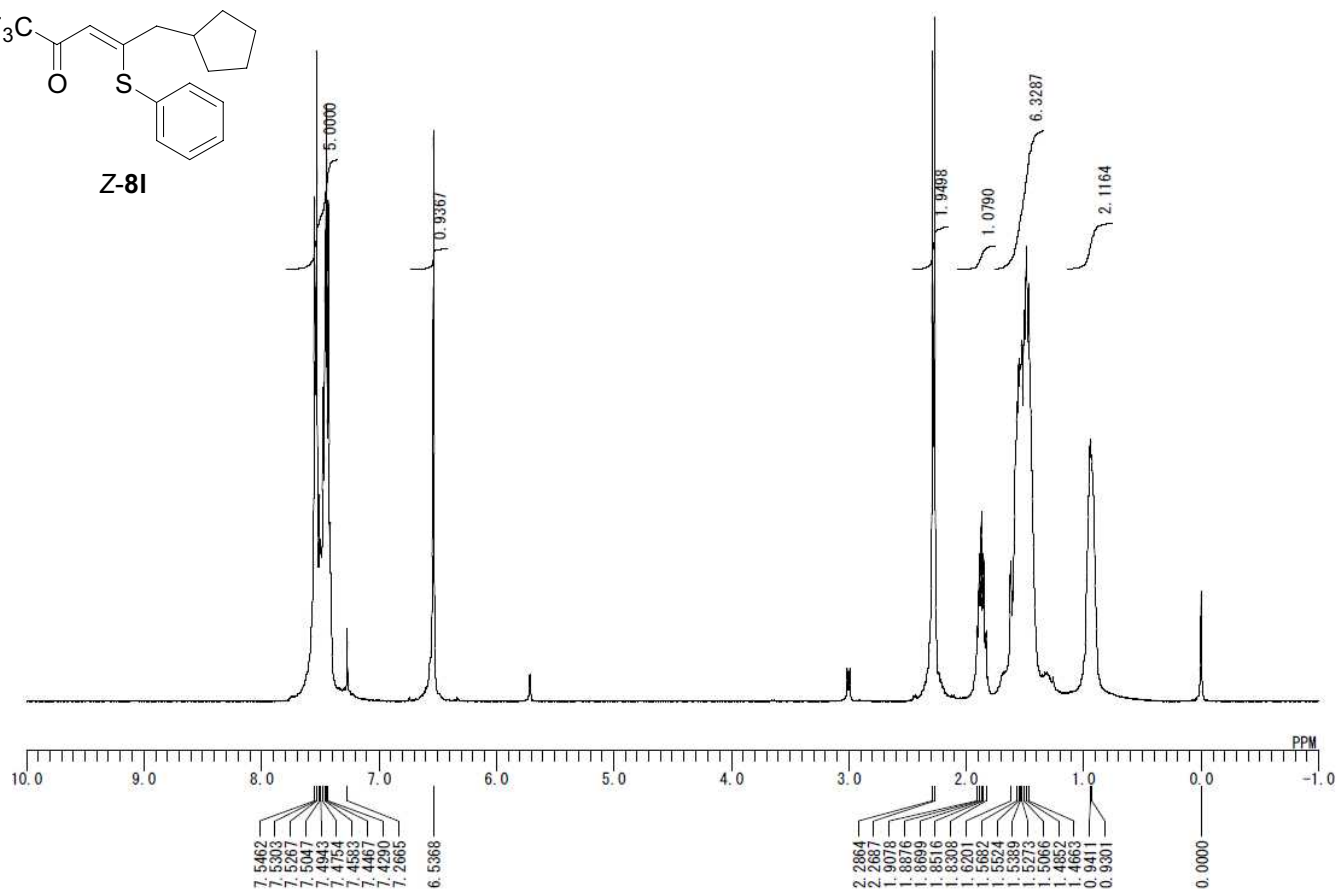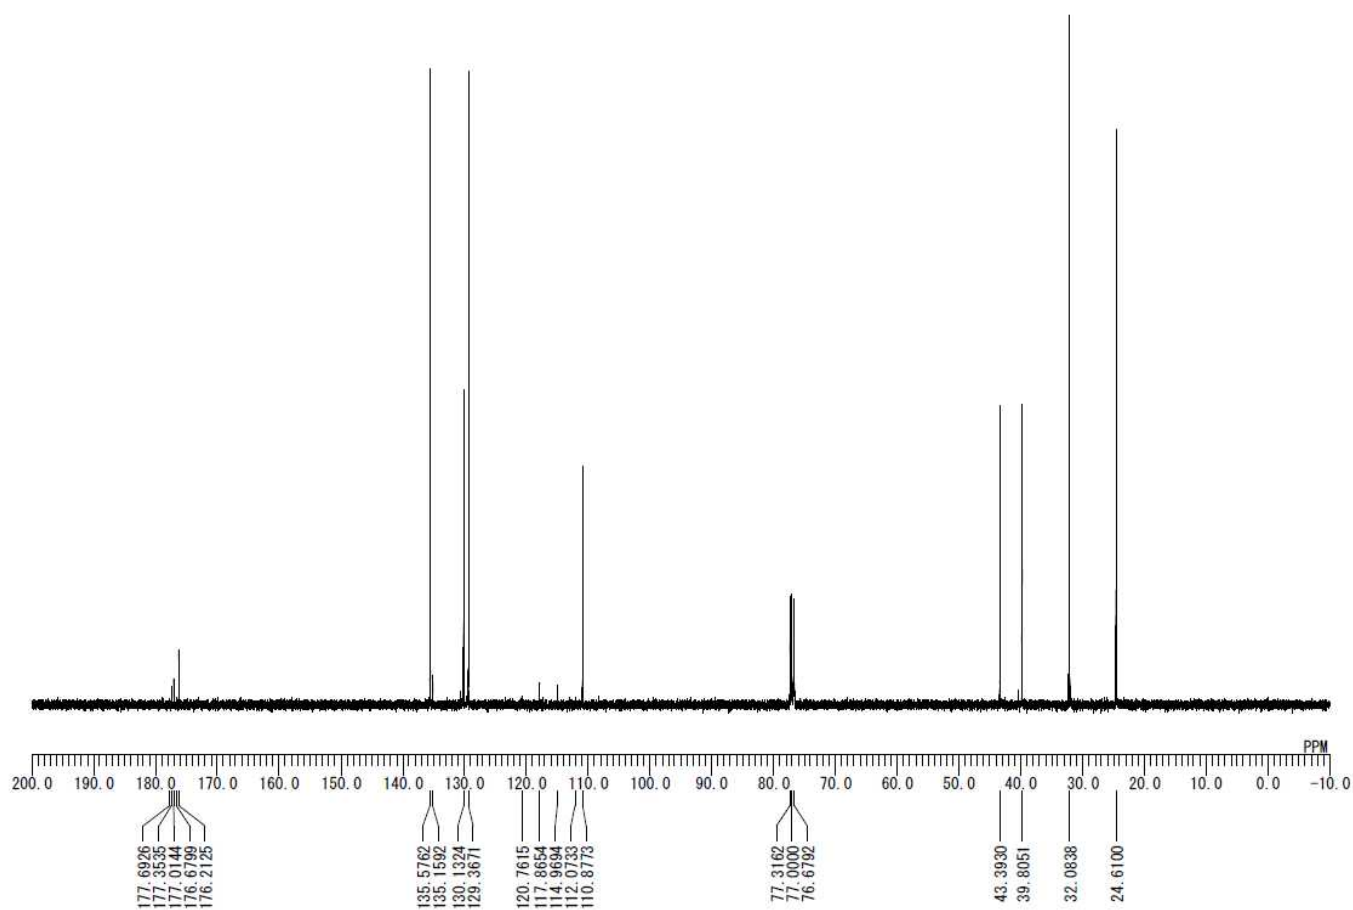

Supplement: b900492k.pdf [file b900492k.pdf]
